# Supplementary material for: l-Pipecolinic acid derived Lewis base organocatalyst for asymmetric reduction of N-aryl imines by trichlorosilane: effects of the side amide group on catalytic performances
Source: Royal Society of Chemistry journal article supplement (doi:10.1039/c2ob26772a), 2012-11-12
Supplement: c2ob26772a.pdf [file c2ob26772a.pdf]

# The NMR spectra of **5b**

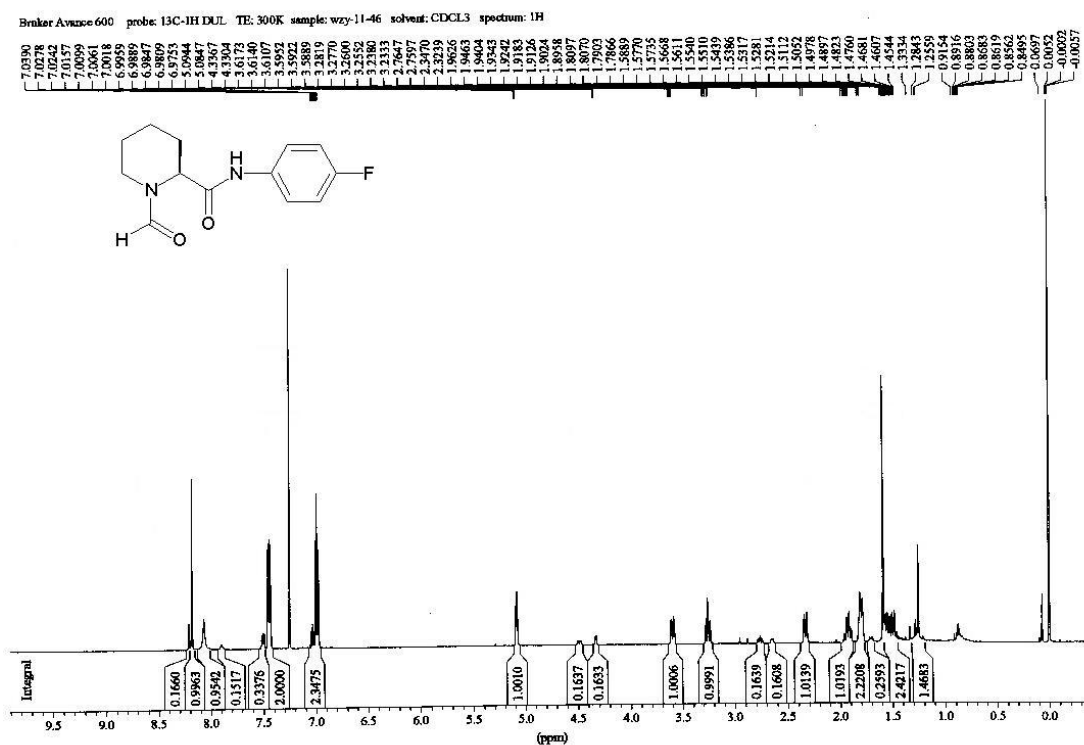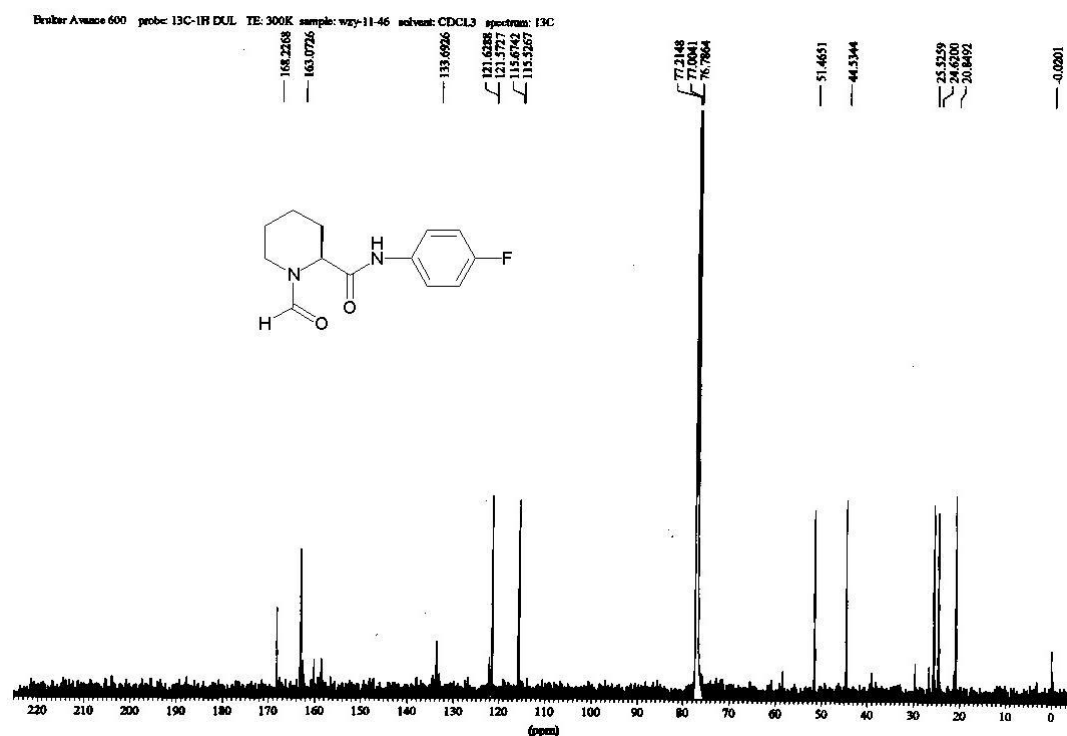

# The NMR spectra of **5c**

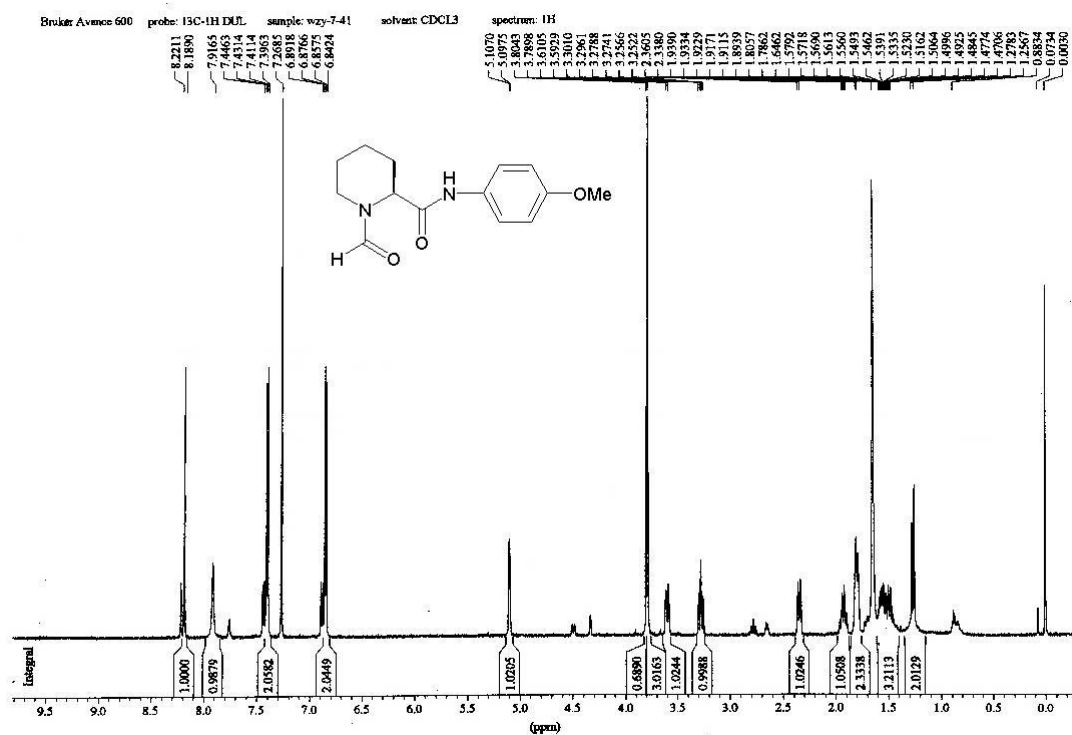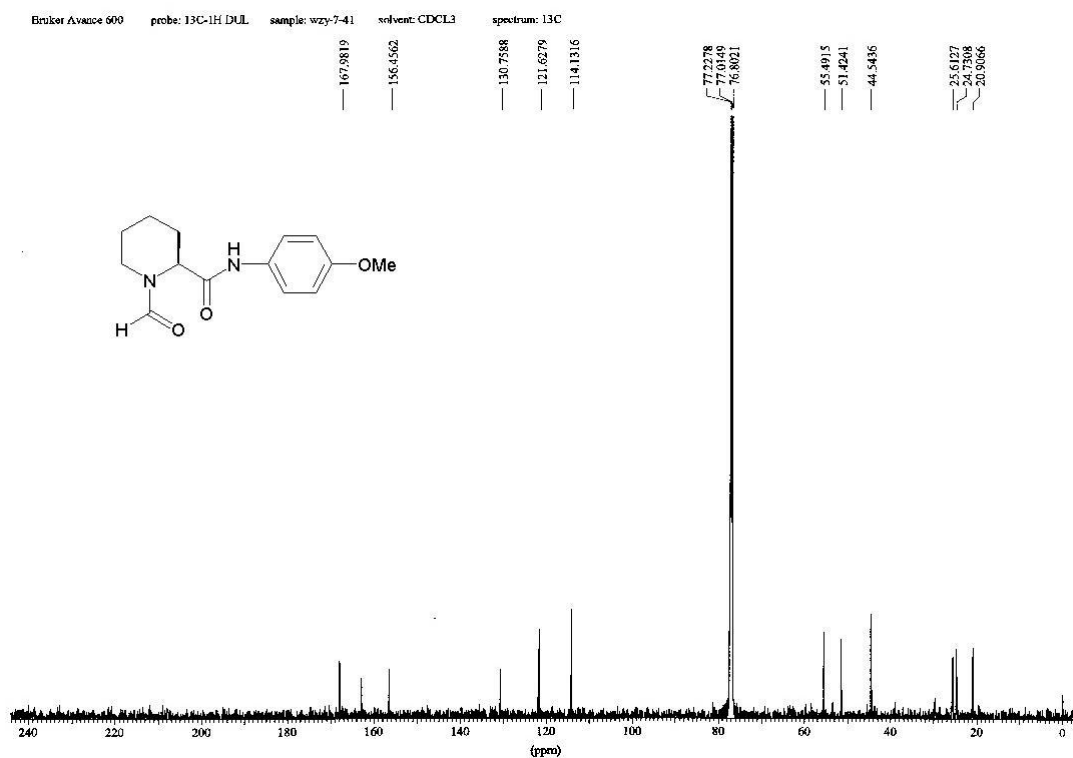

# The NMR spectra of **5d**

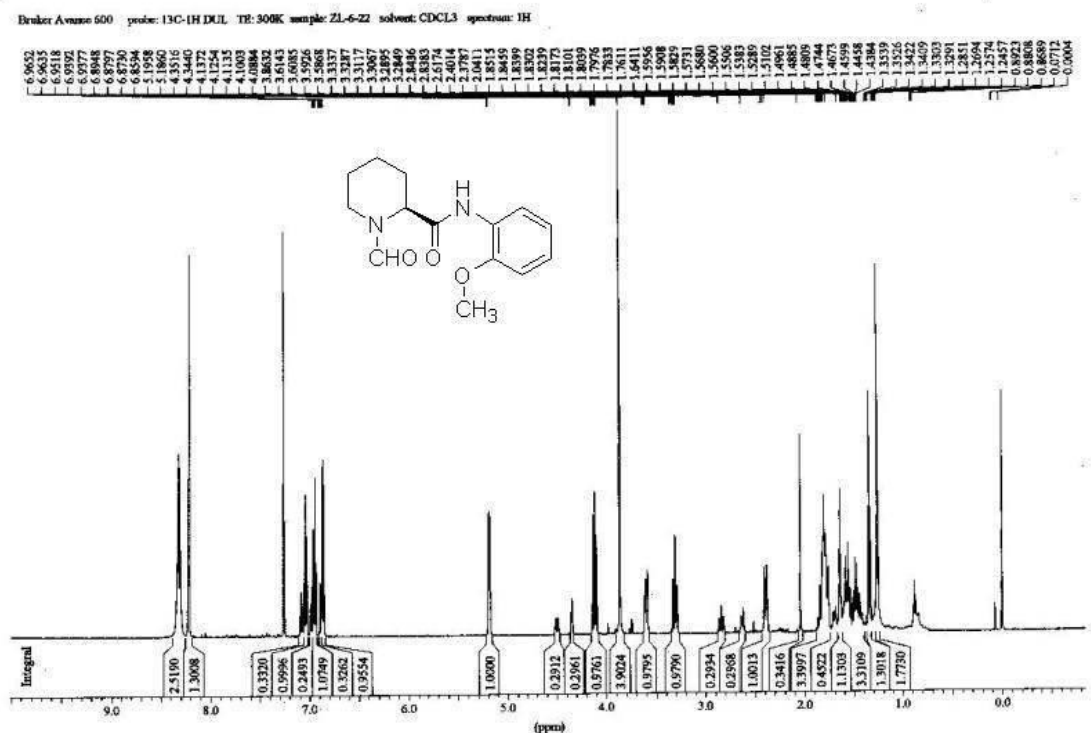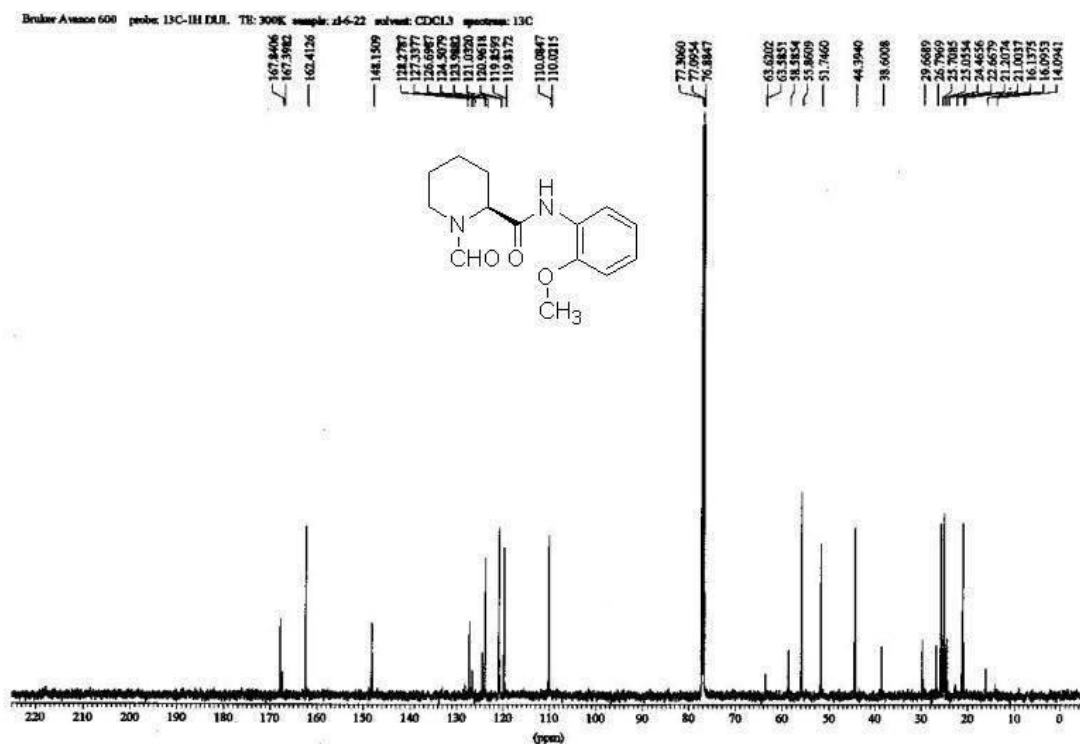

The NMR spectra of **5e**

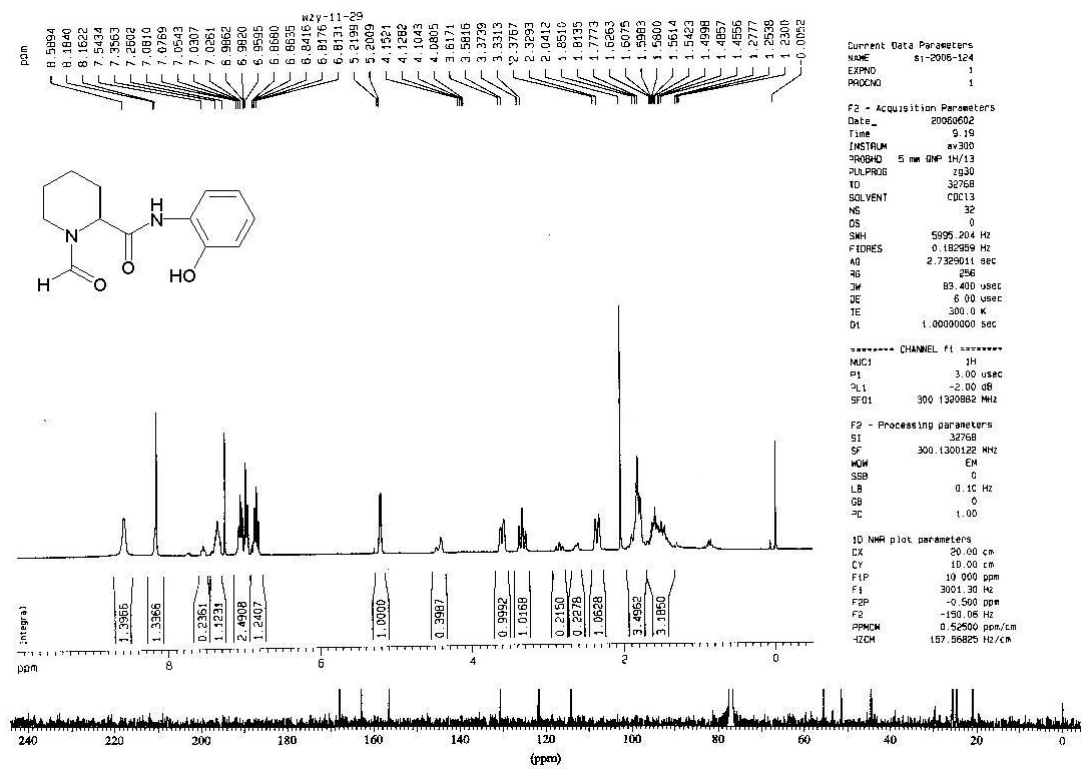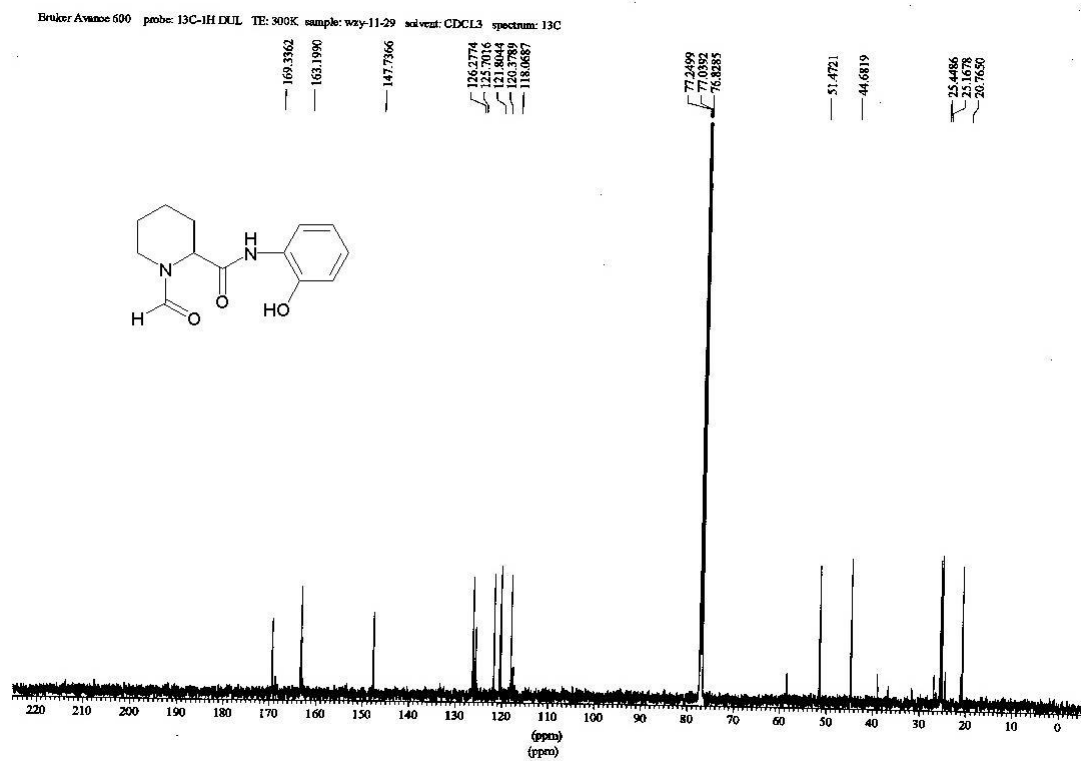

# The NMR spectra of **5f**

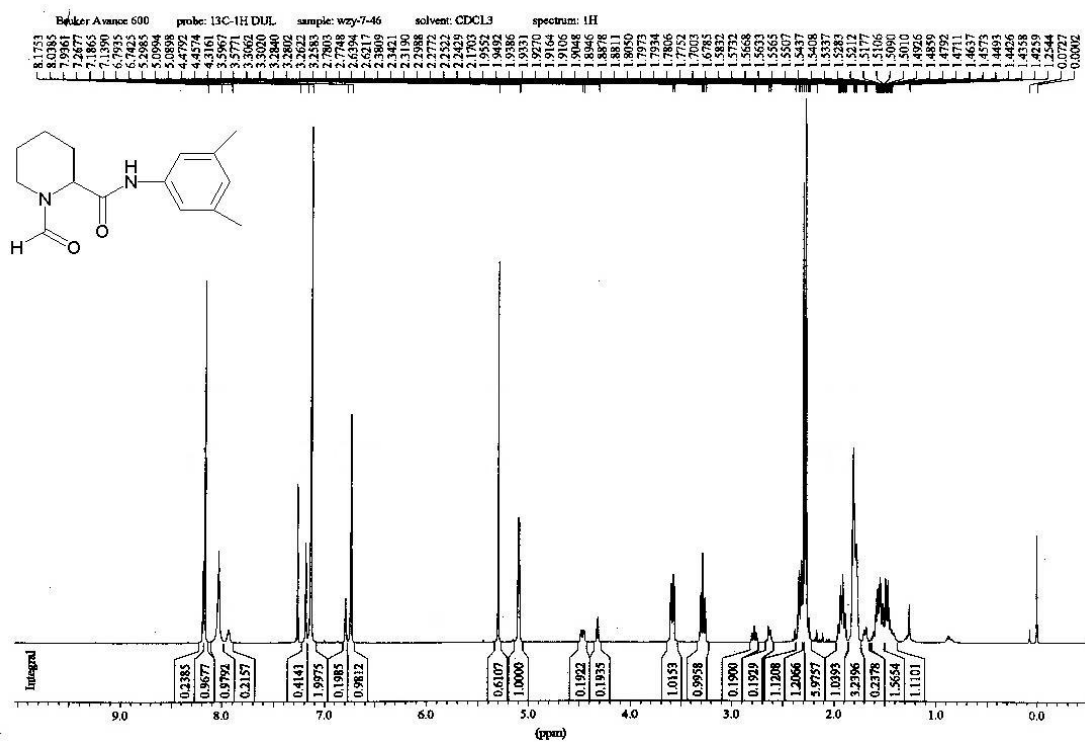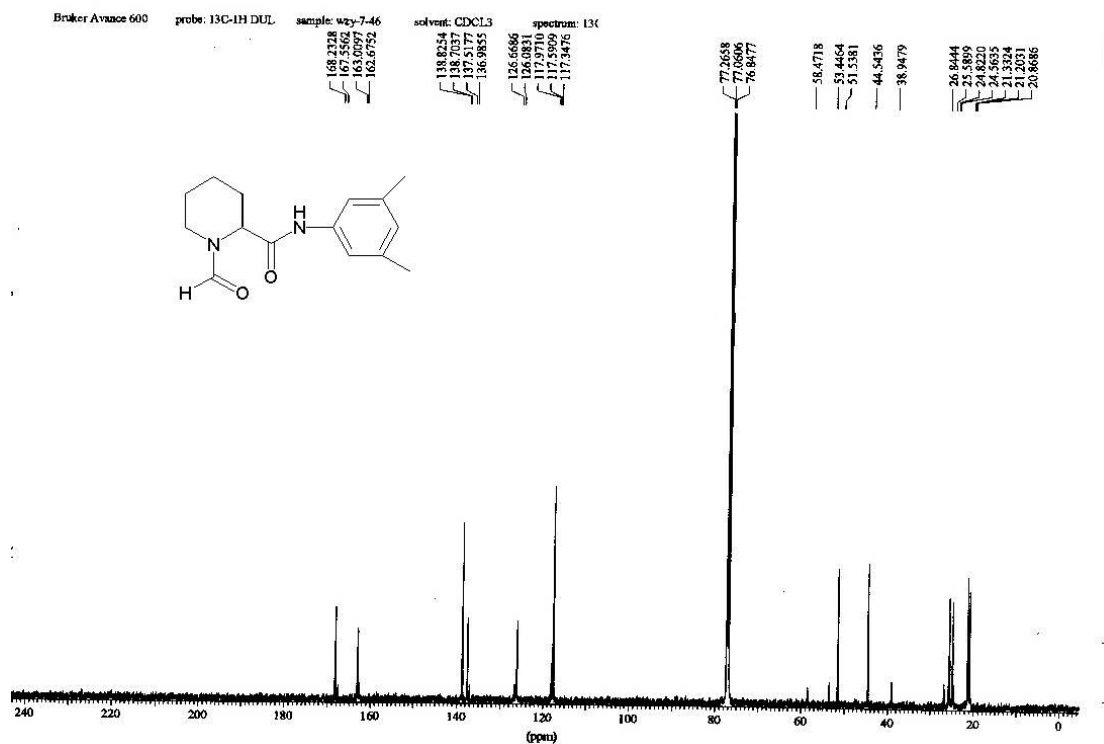

# The NMR spectra of **5g**

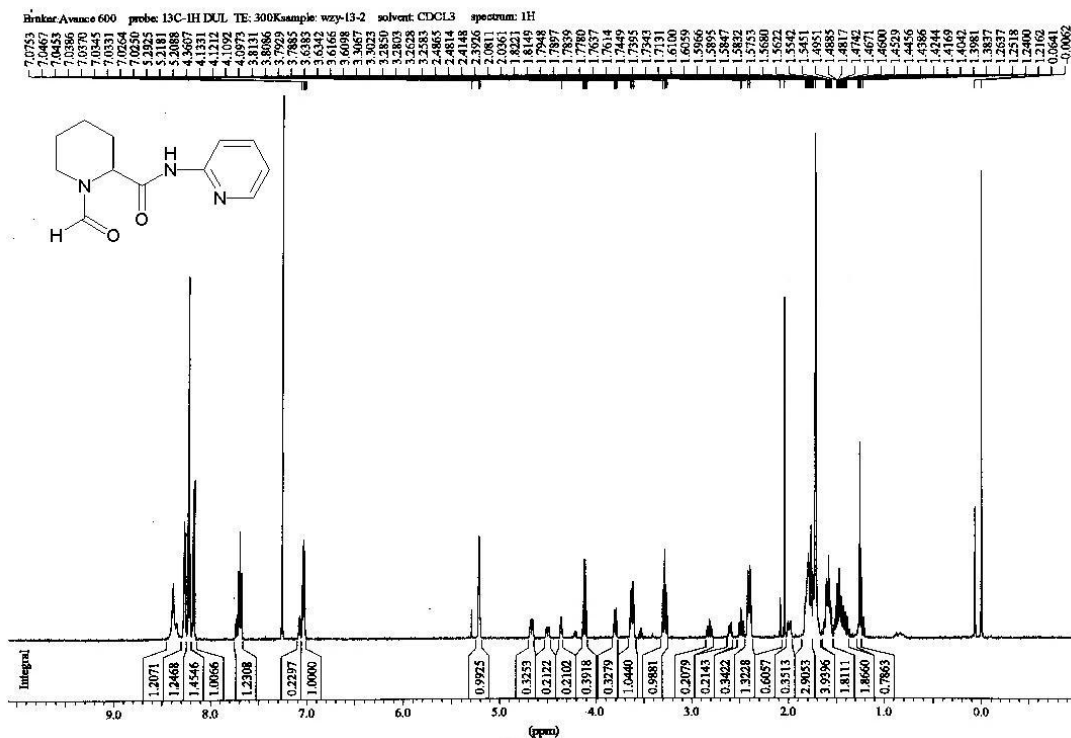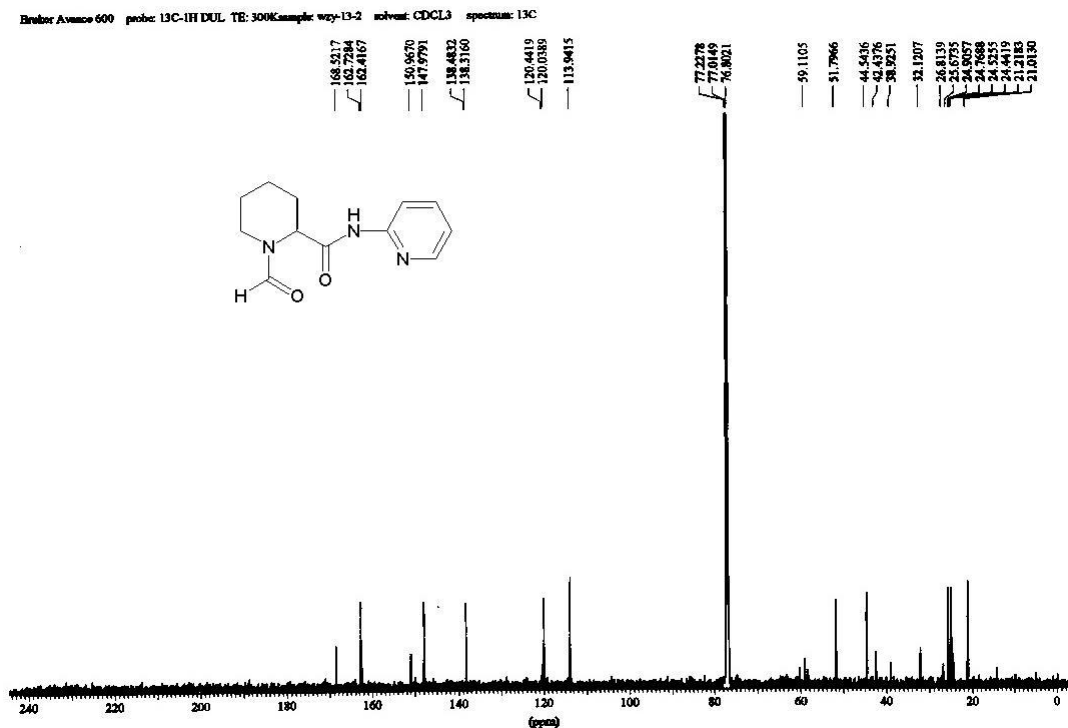

### The NMR spectra of **5h**

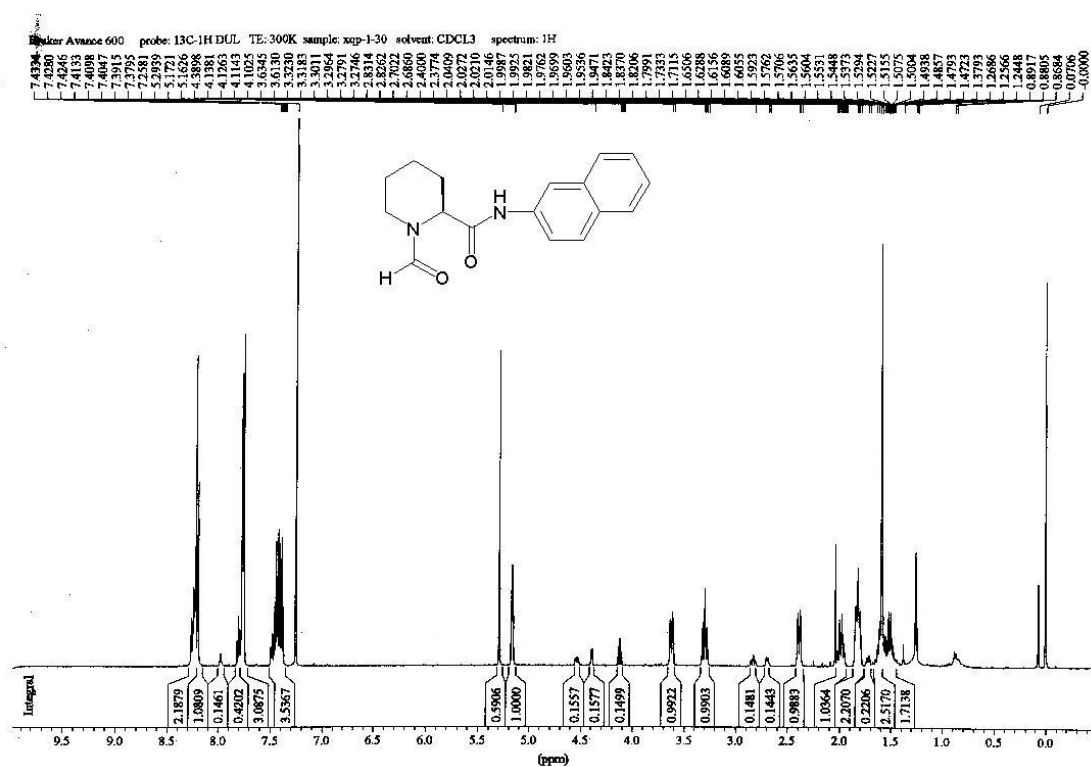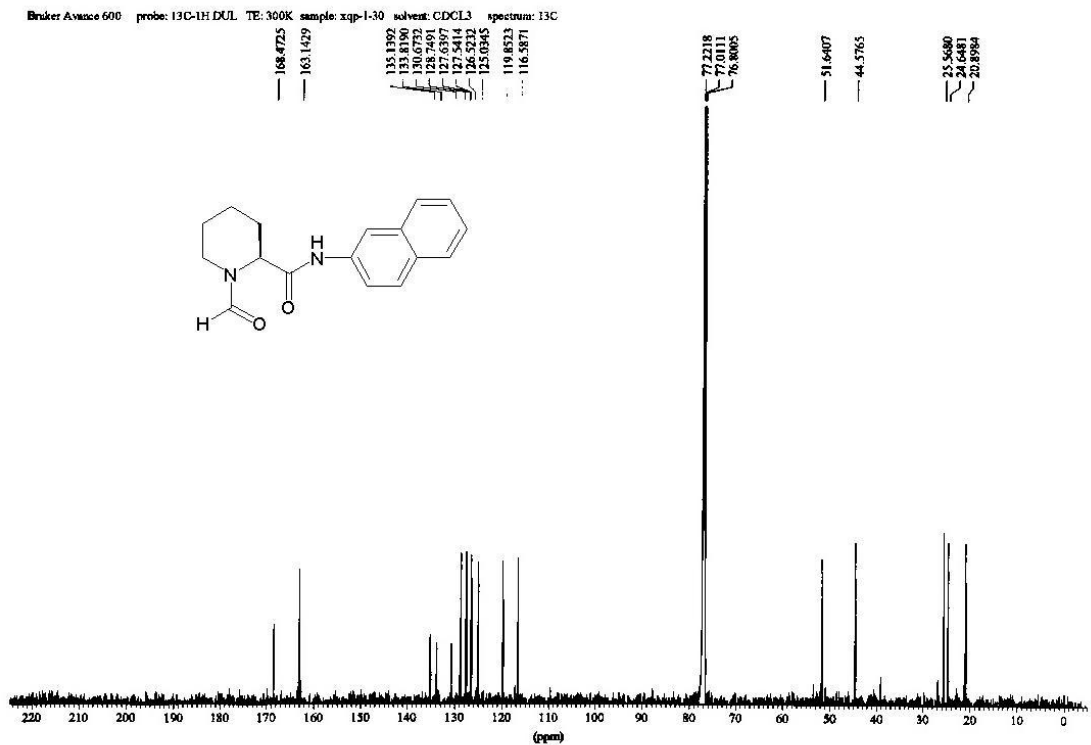

# The NMR spectra of **5i**

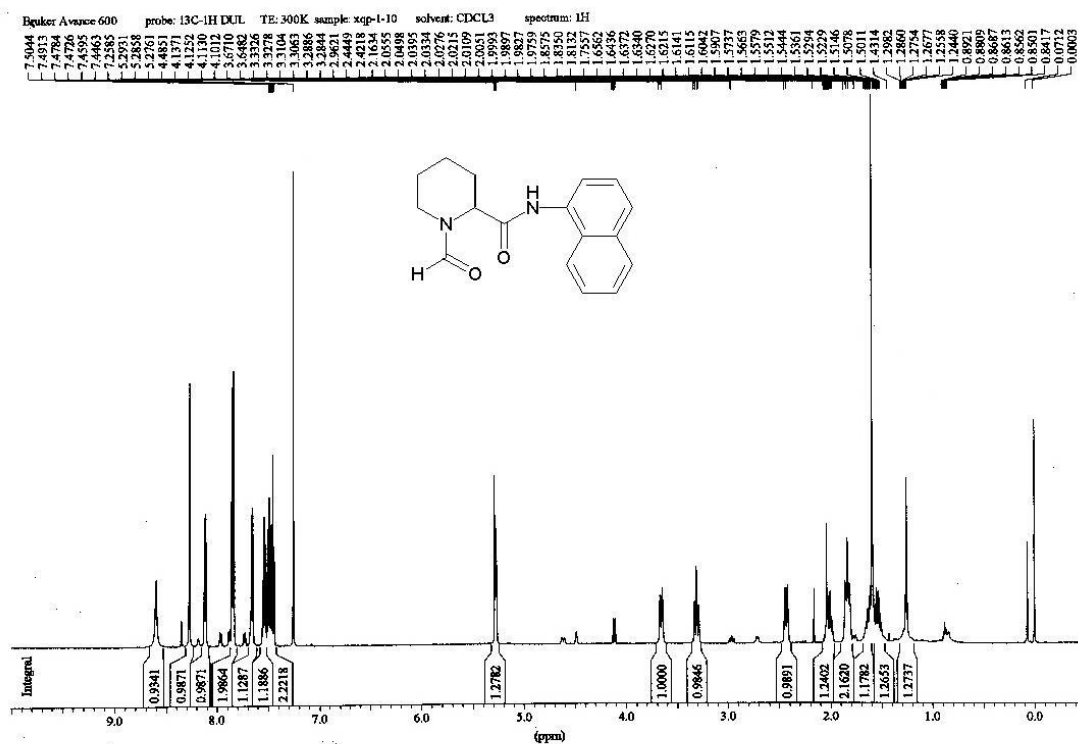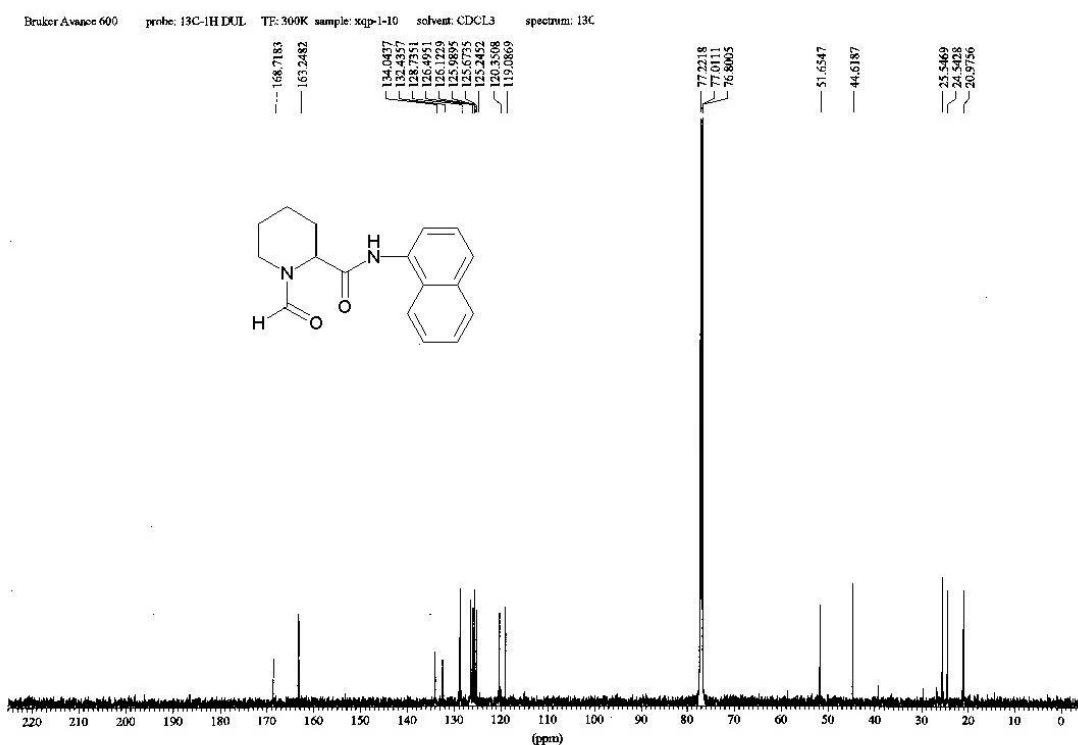



# The NMR spectra of **6b**

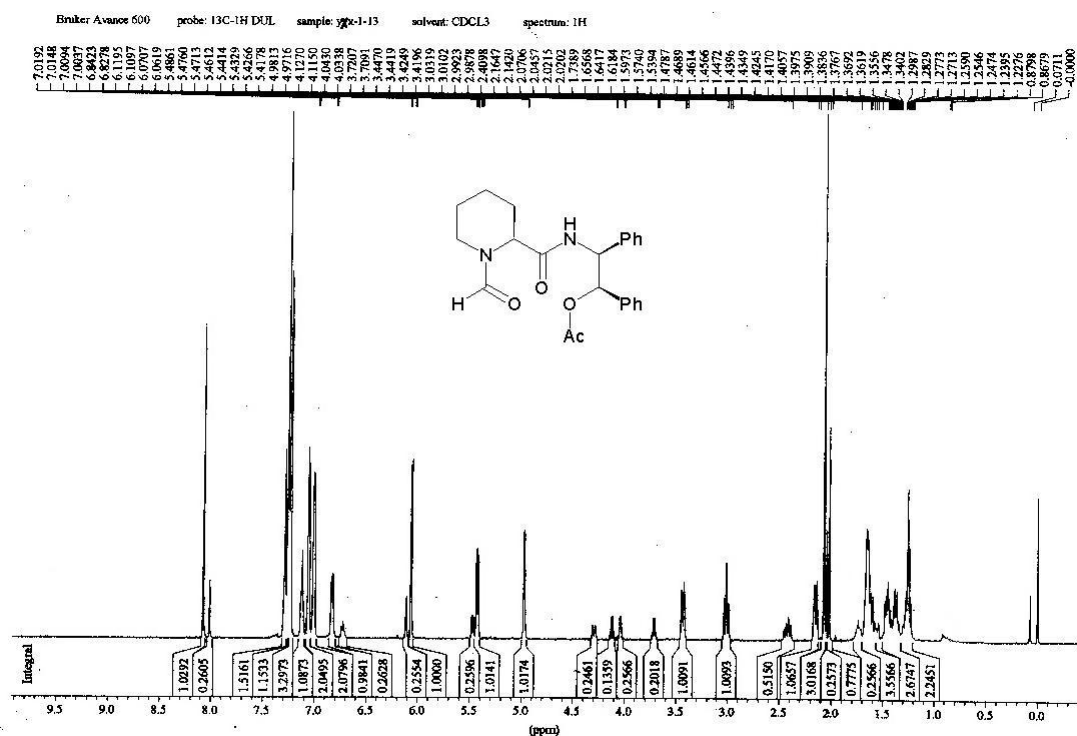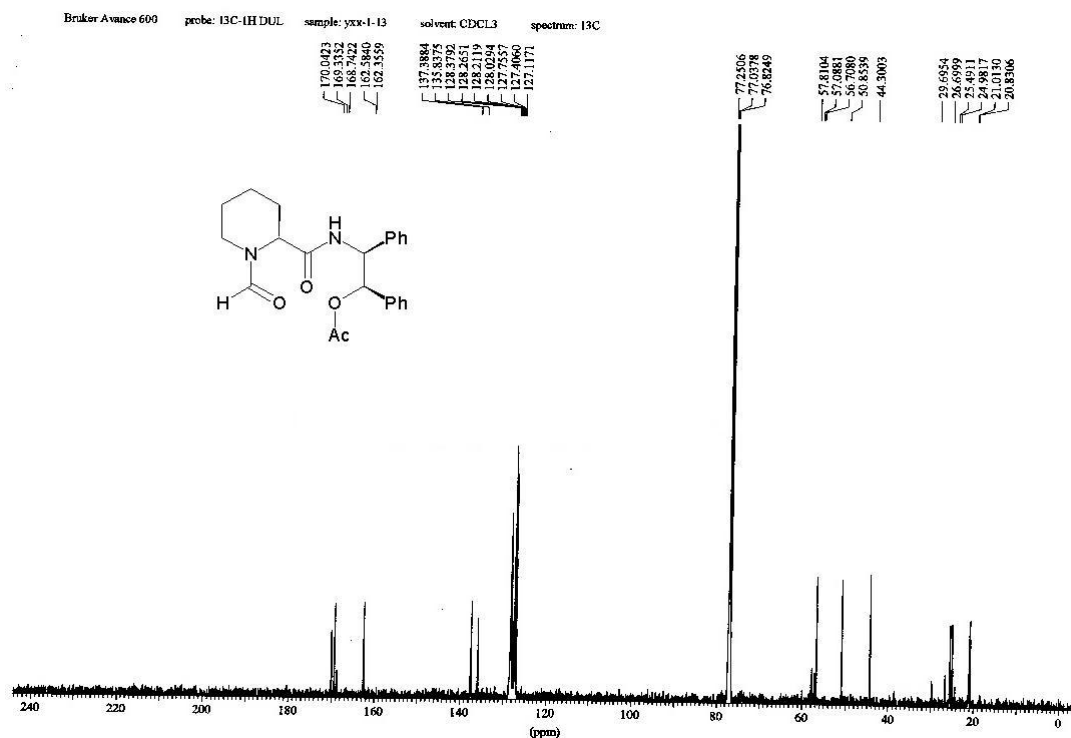



The NMR spectra of **7a**

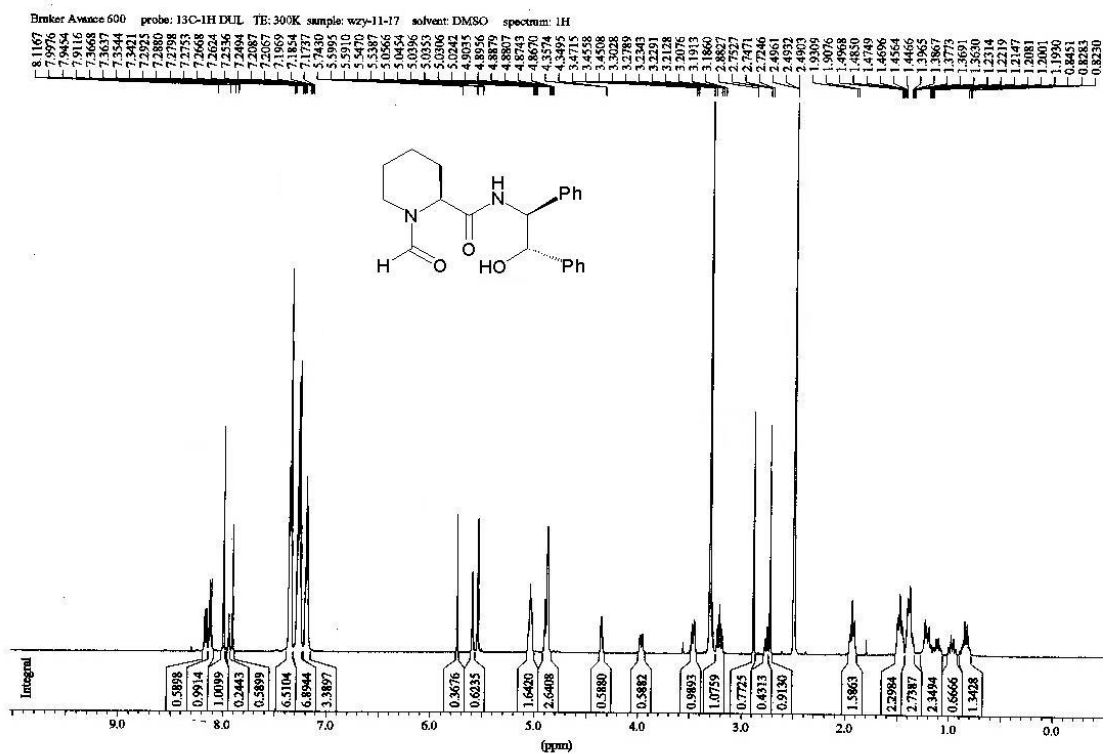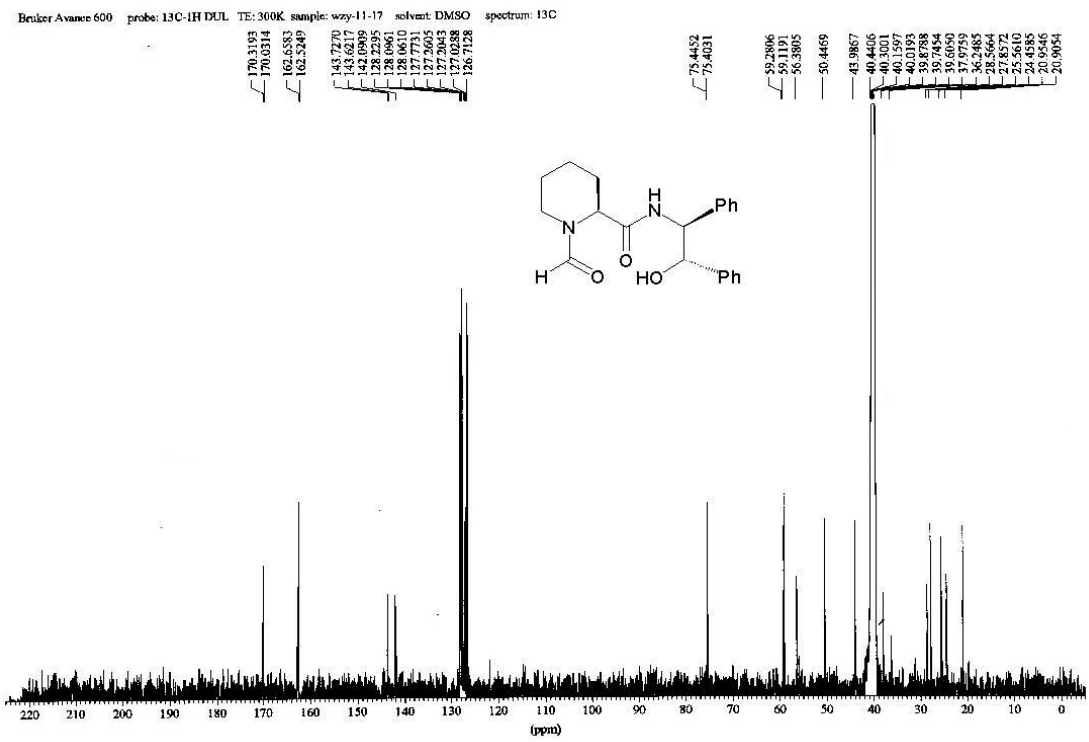







# The NMR spectra of **8b**

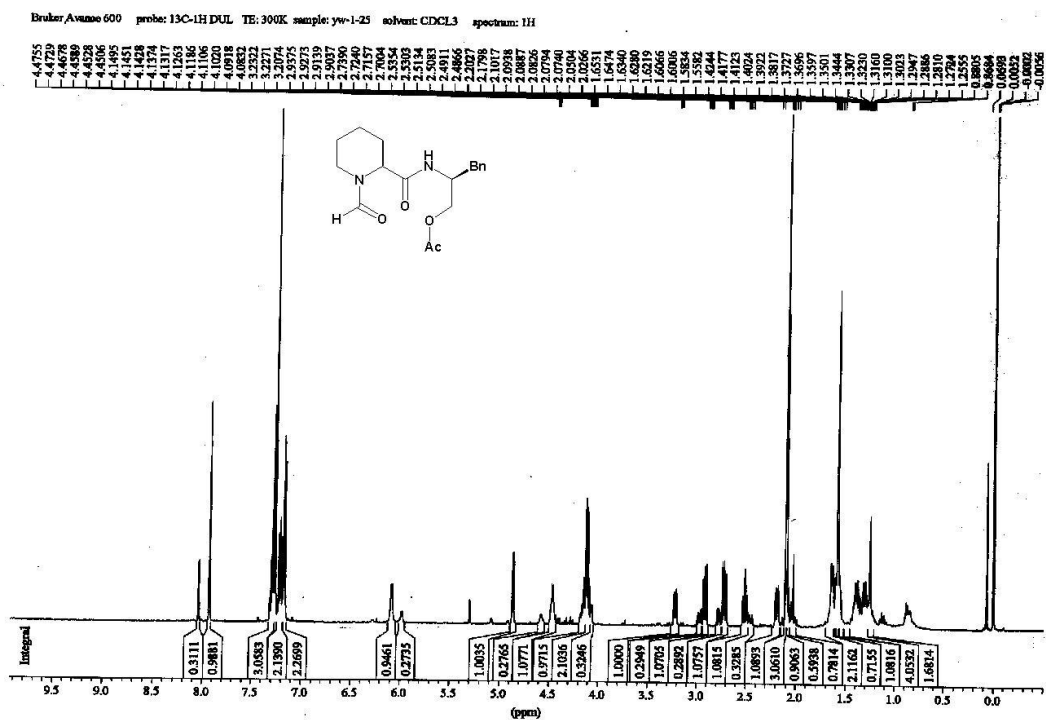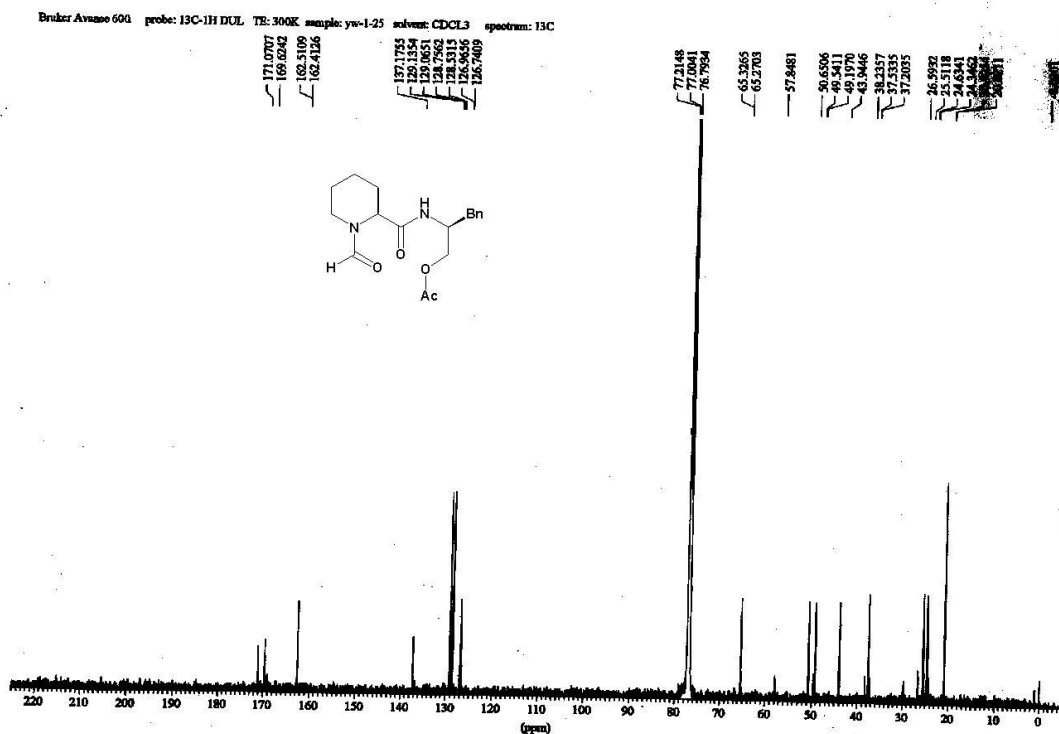

The NMR spectra of 8c

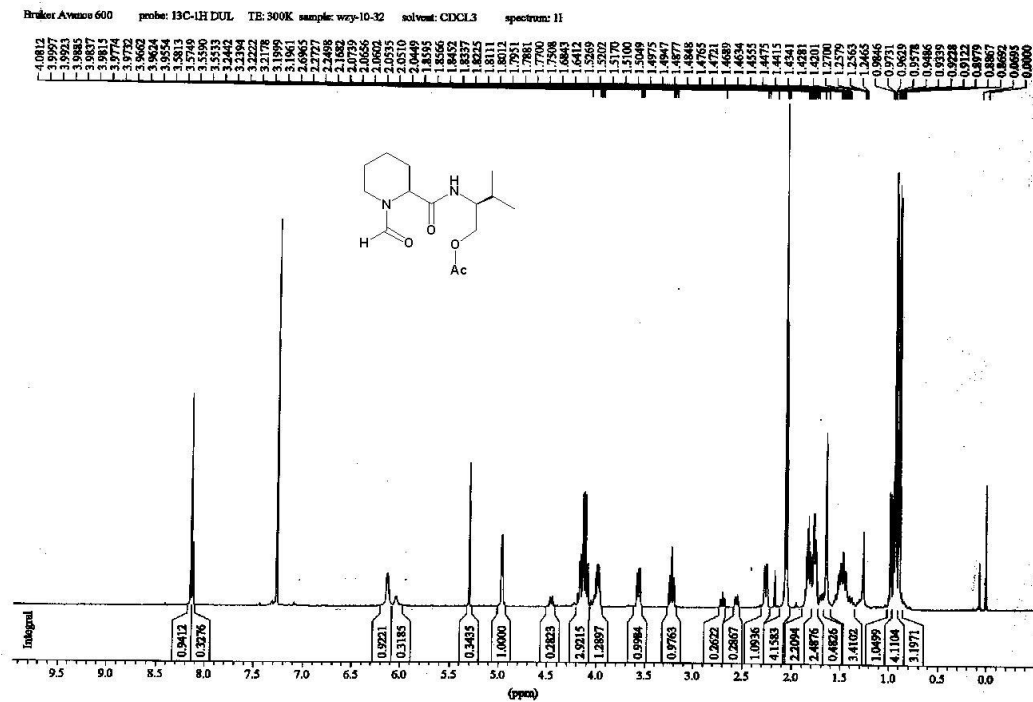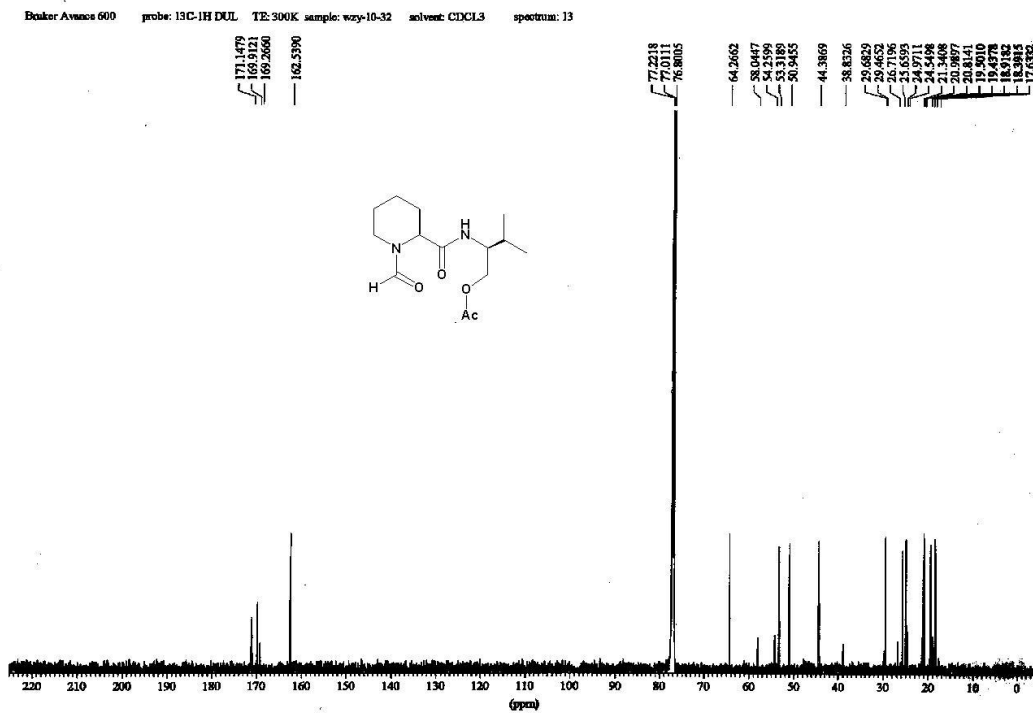



The NMR spectra of **9b**

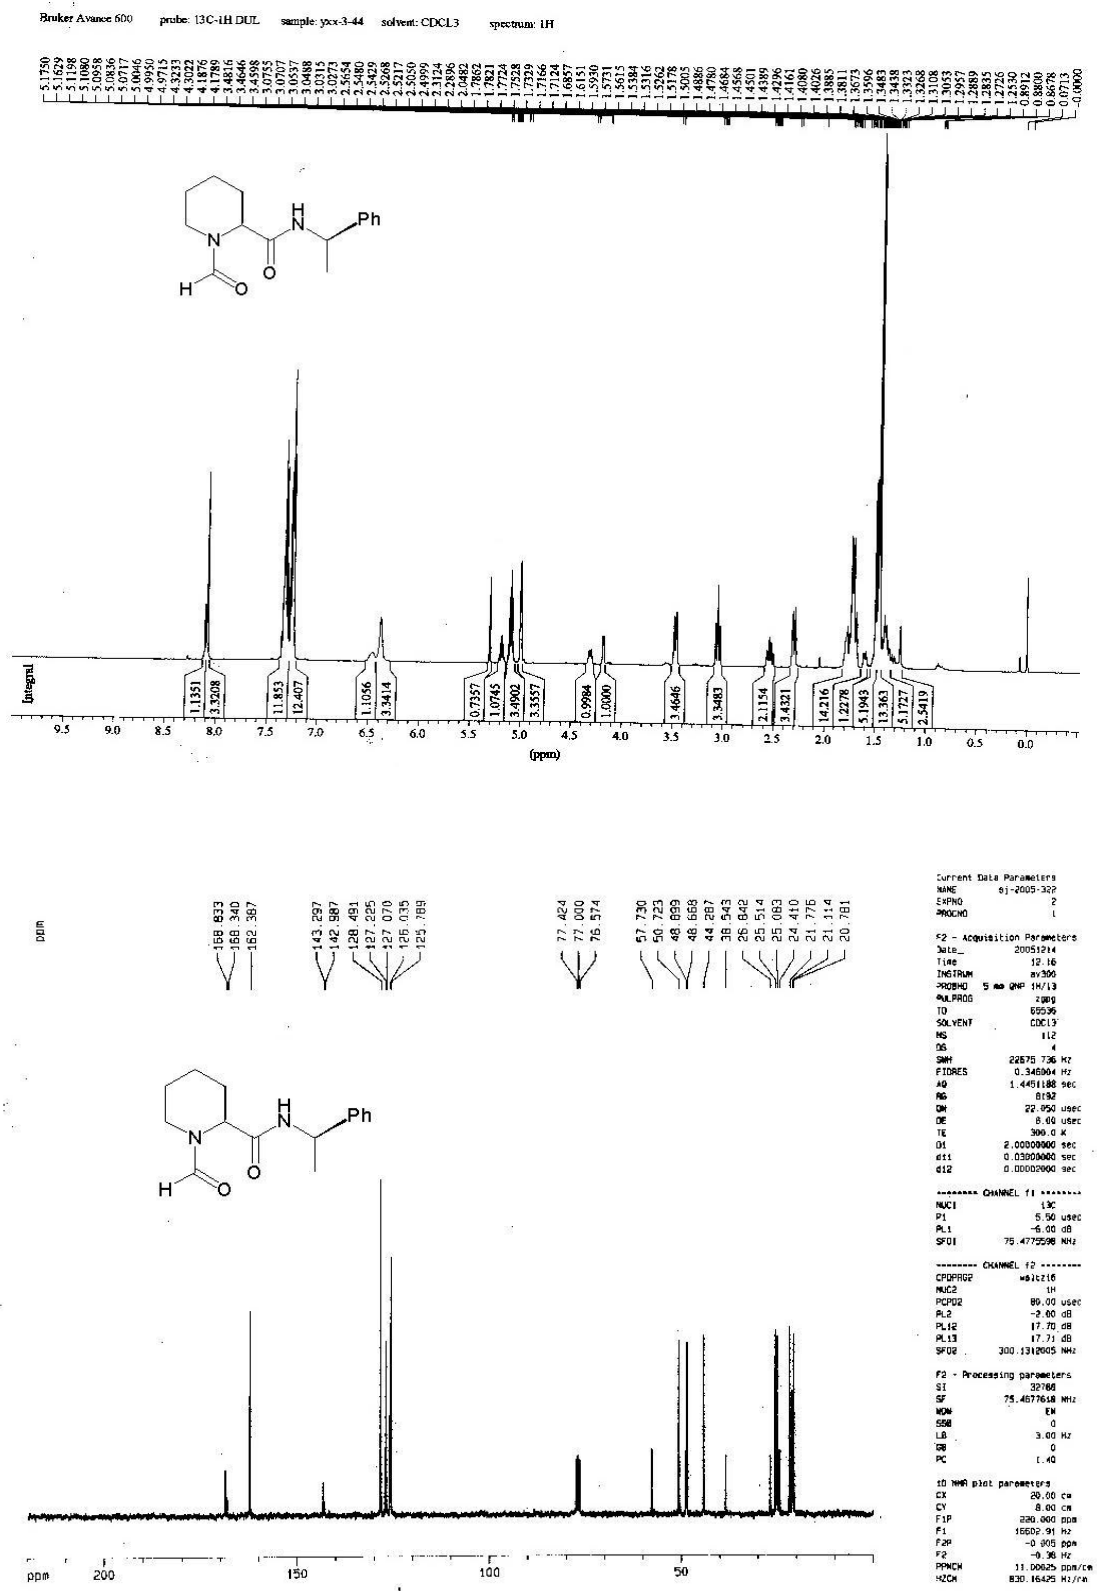



# The NMR spectra of **9d**

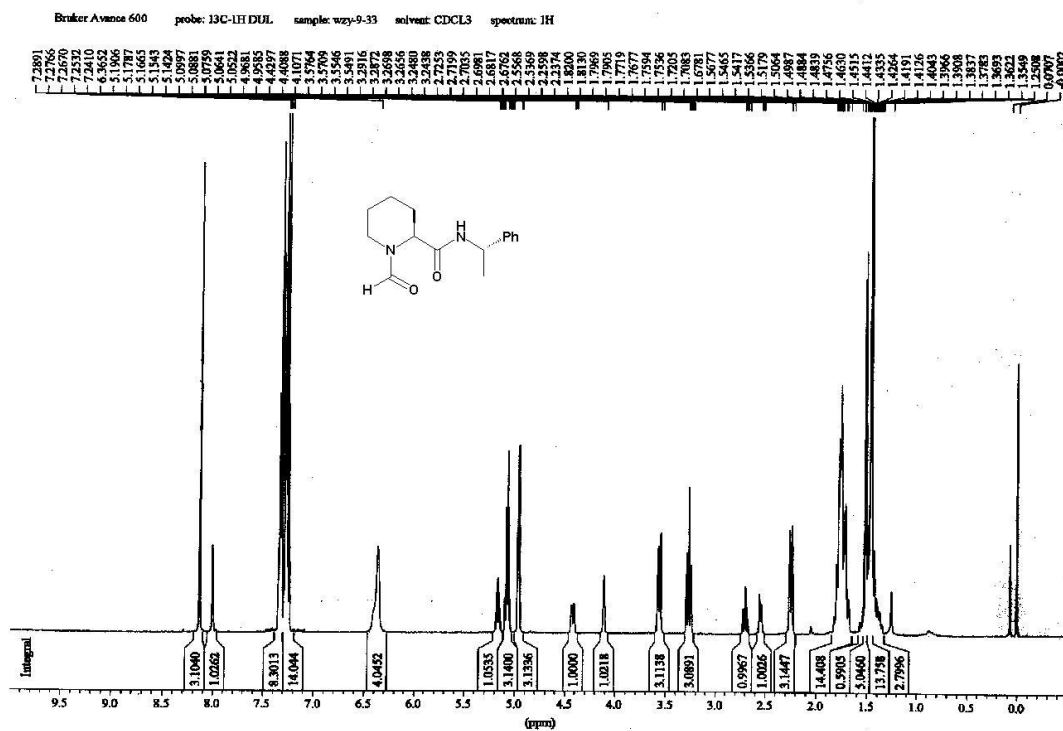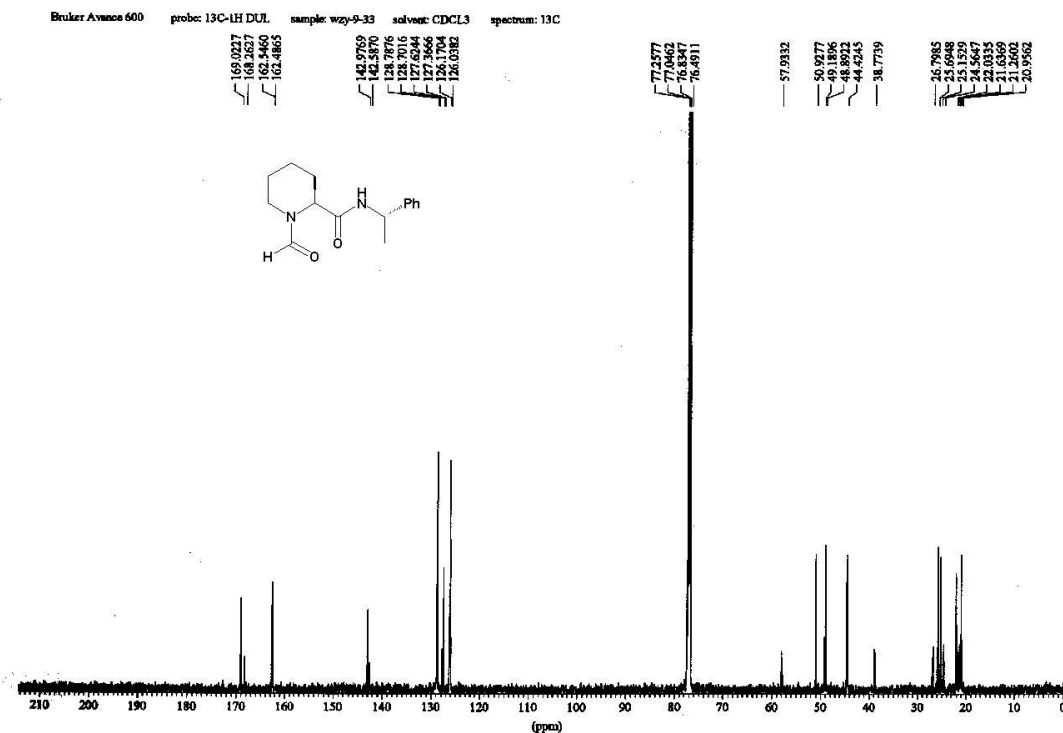

# The NMR spectra of **10a**

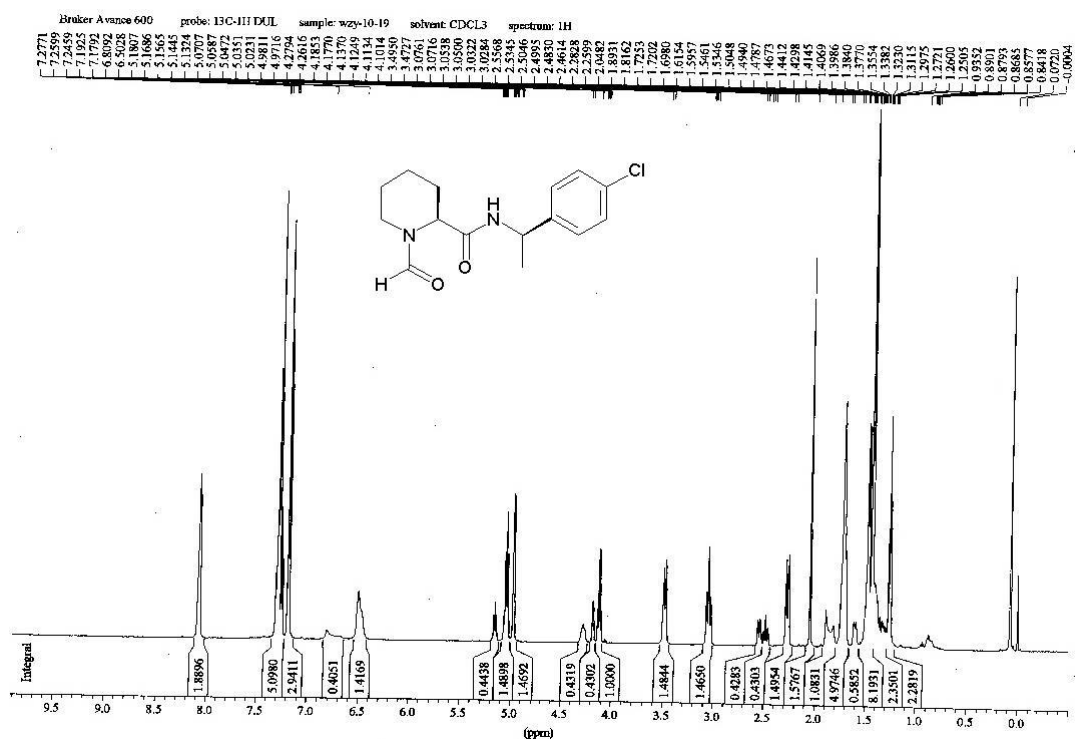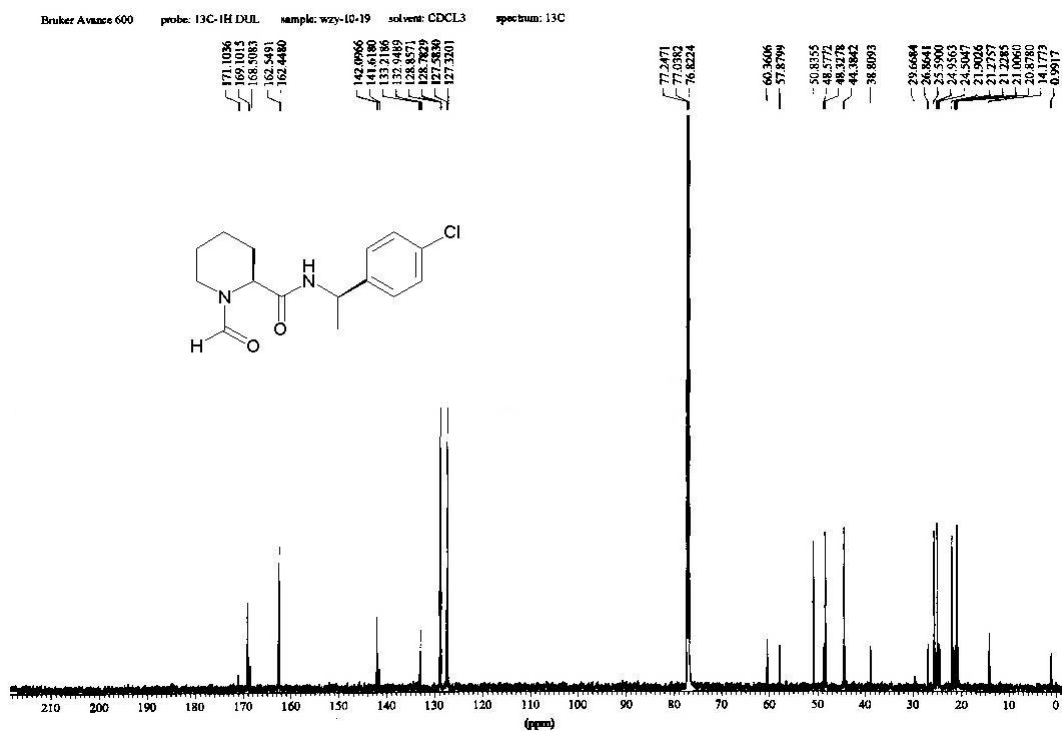

The NMR spectra of 10b

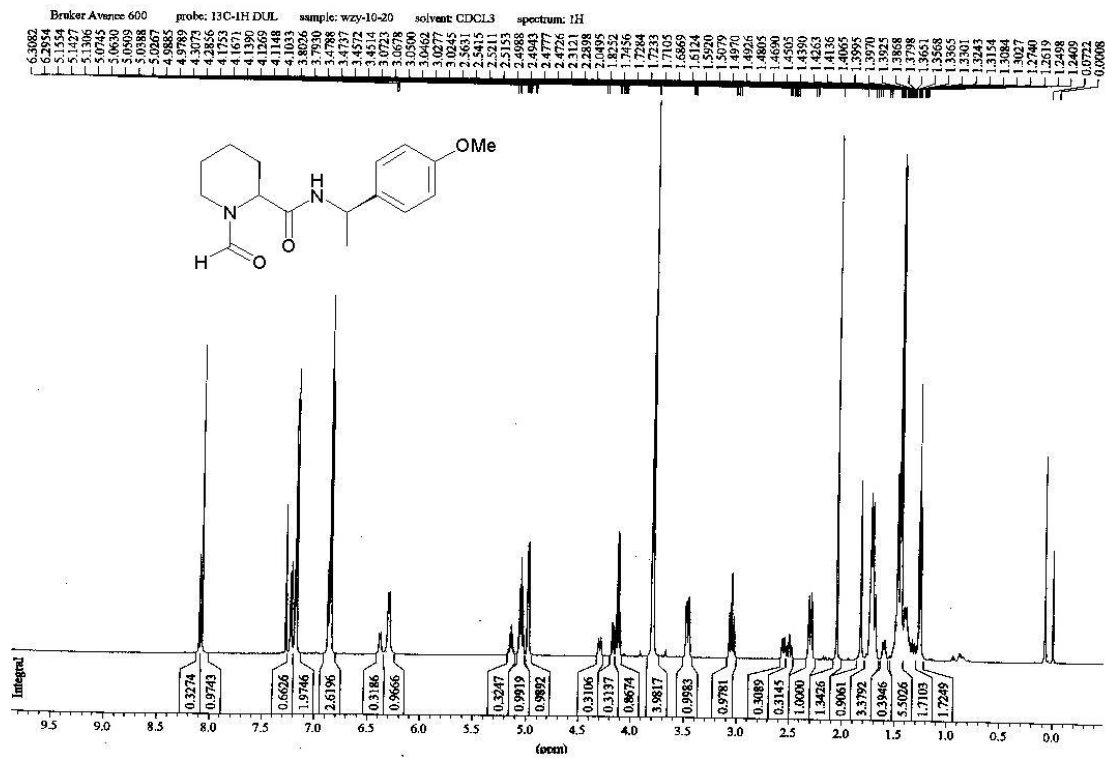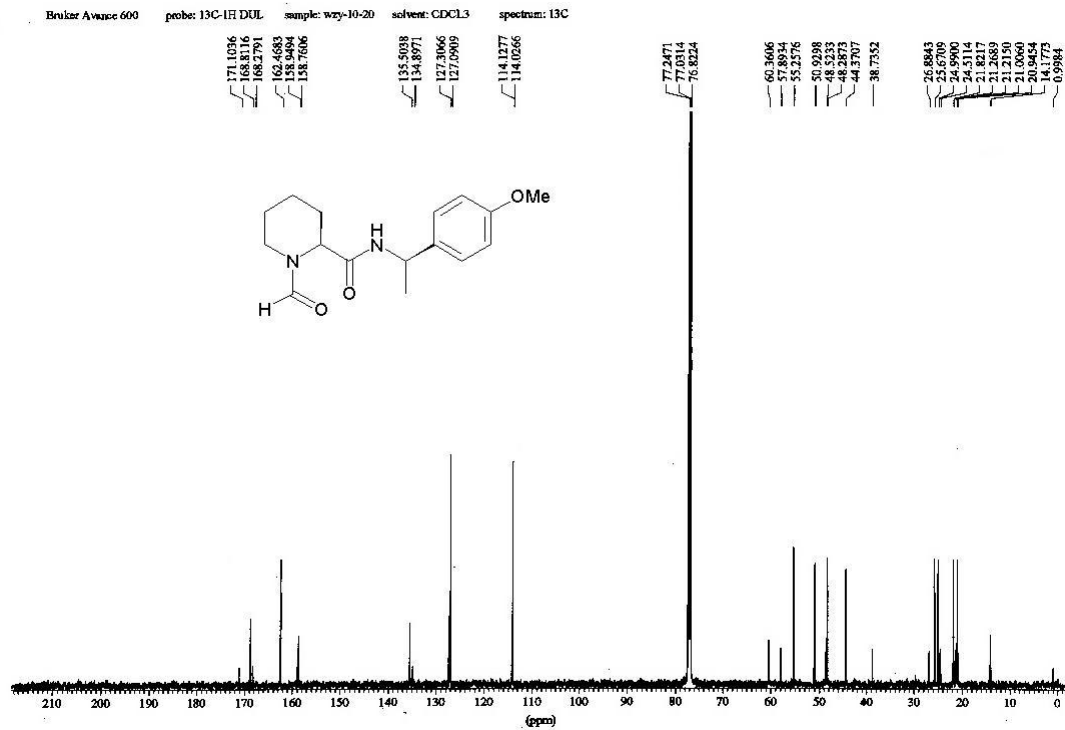



The NMR spectra of **11a**

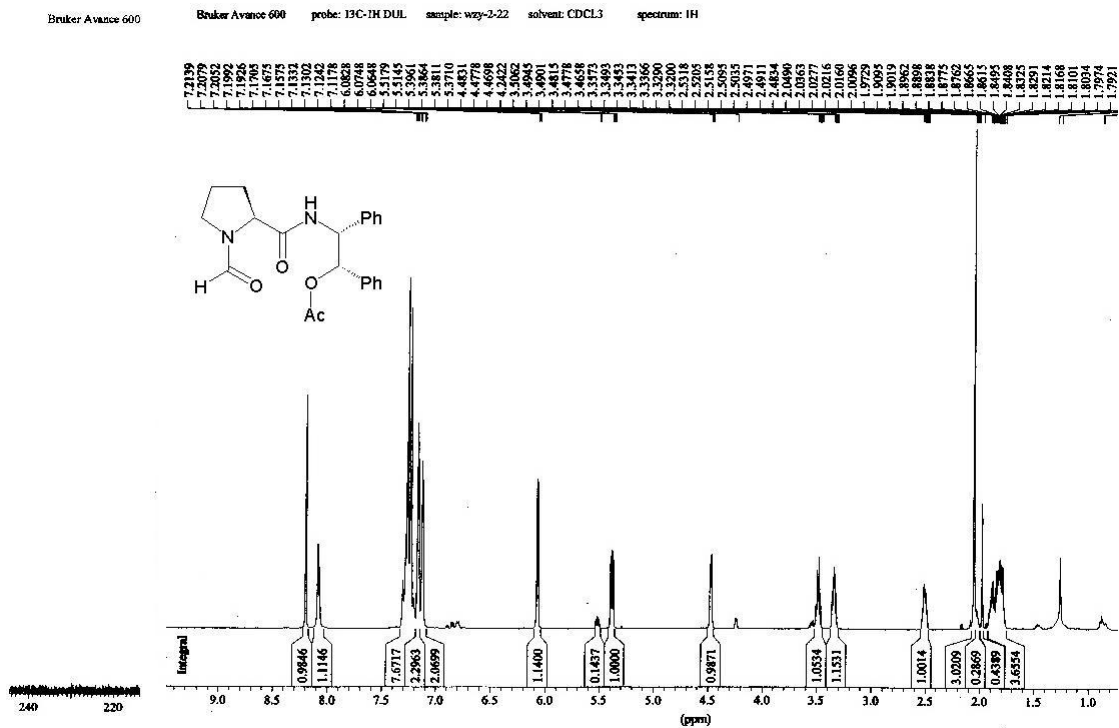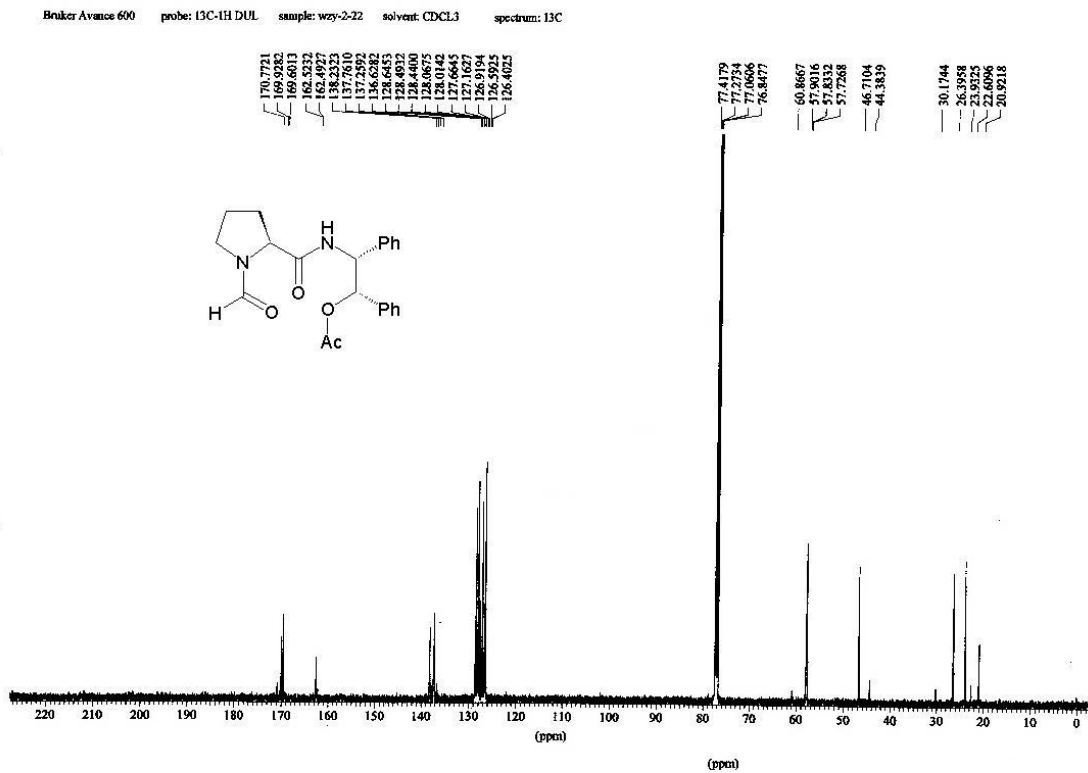

# The NMR spectra of **11b**

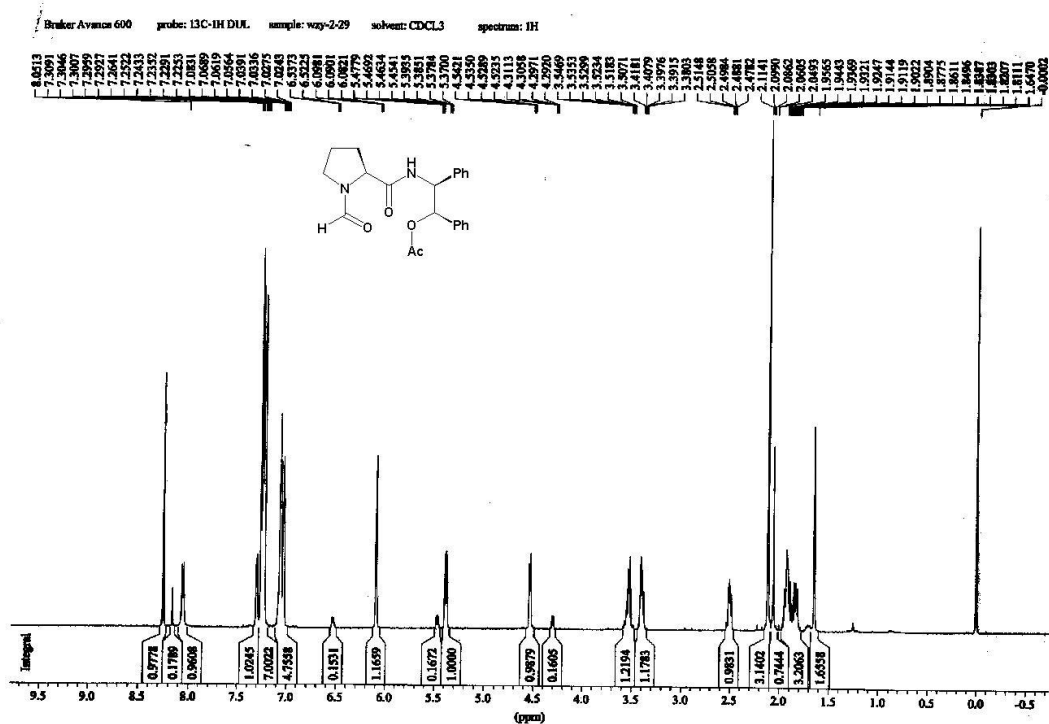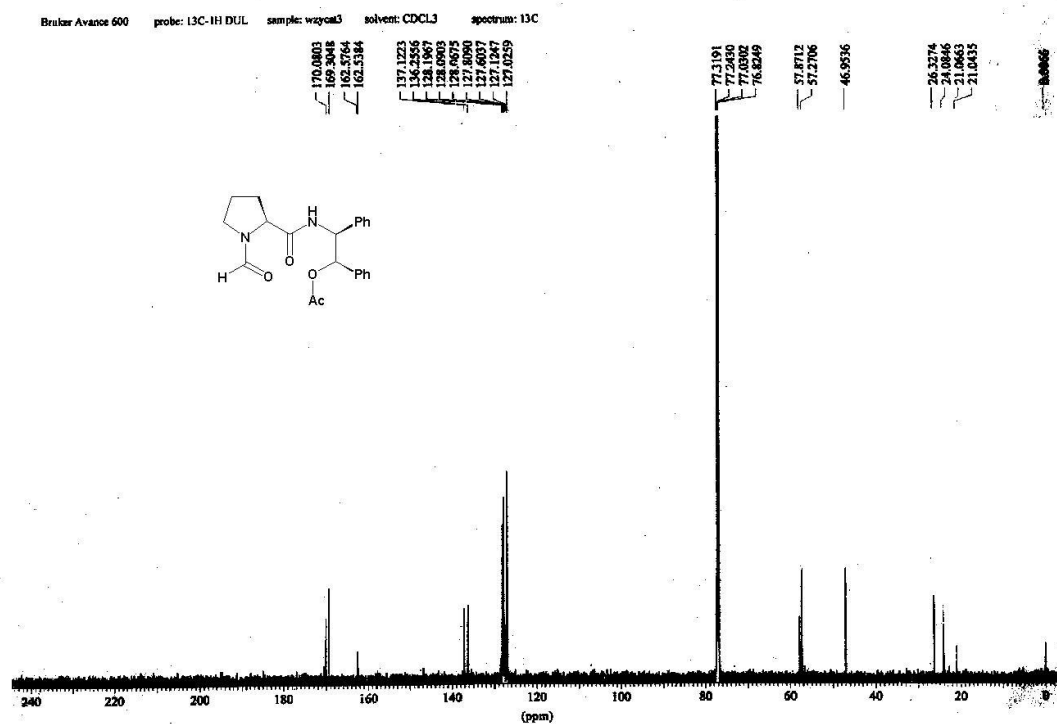



The NMR spectra of 12

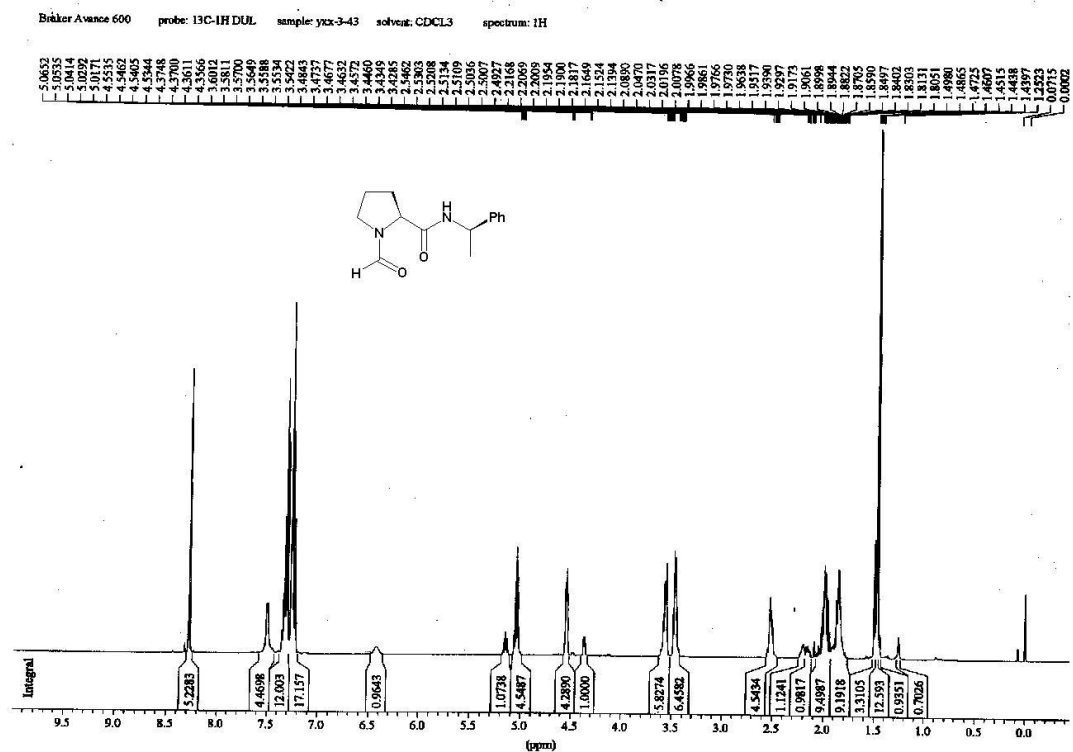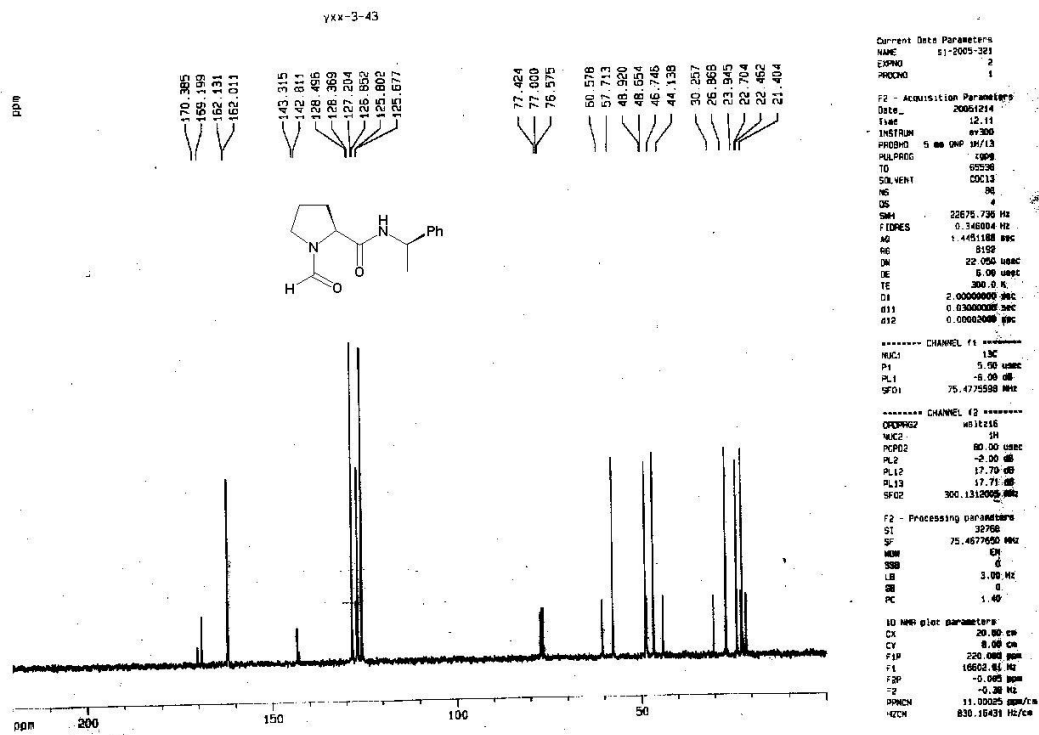

The NMR spectra of **1e**

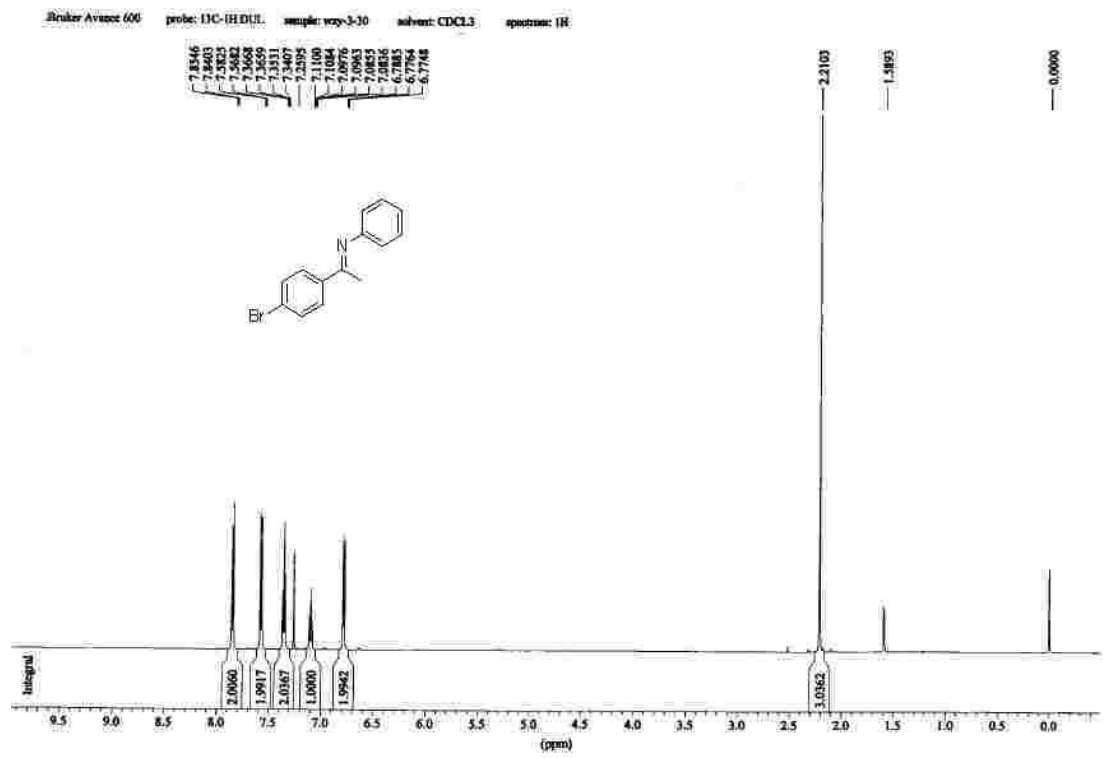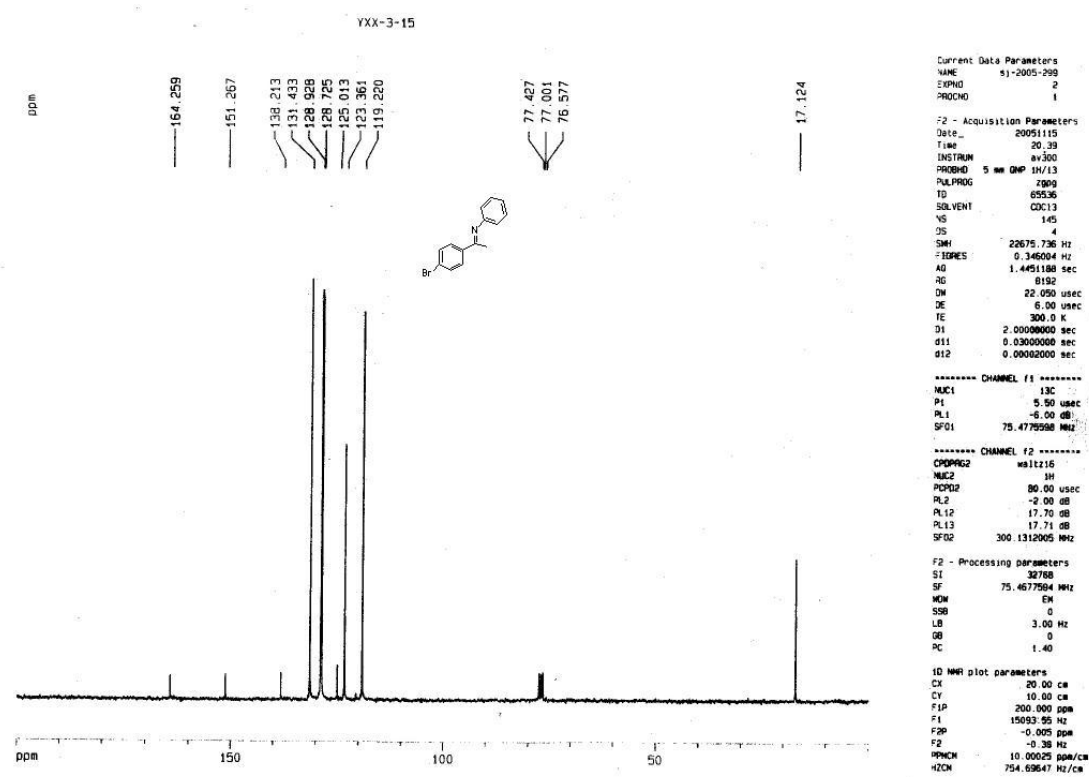

The NMR spectra of **1f**

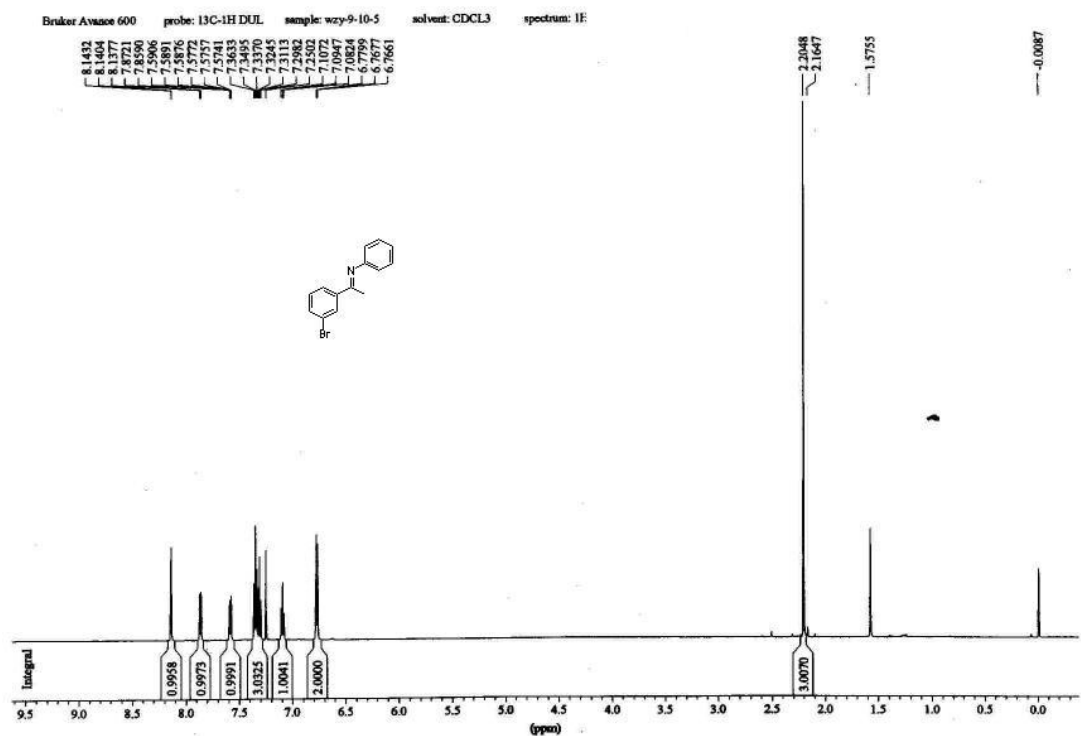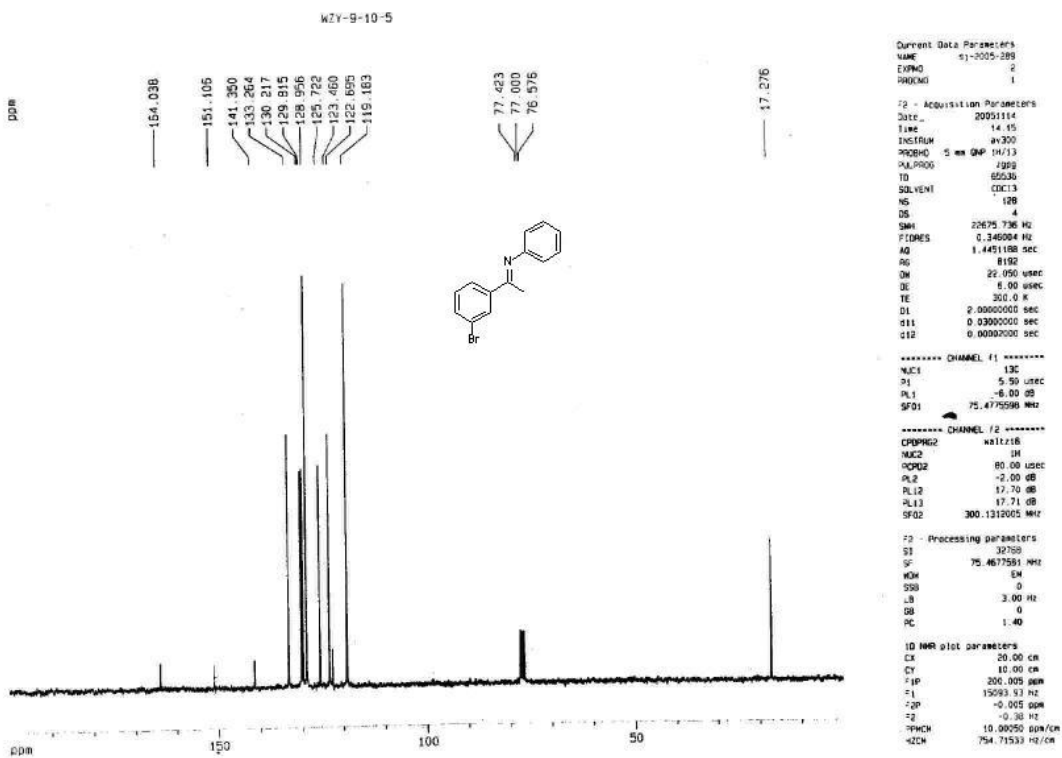

The NMR spectra of **1h**

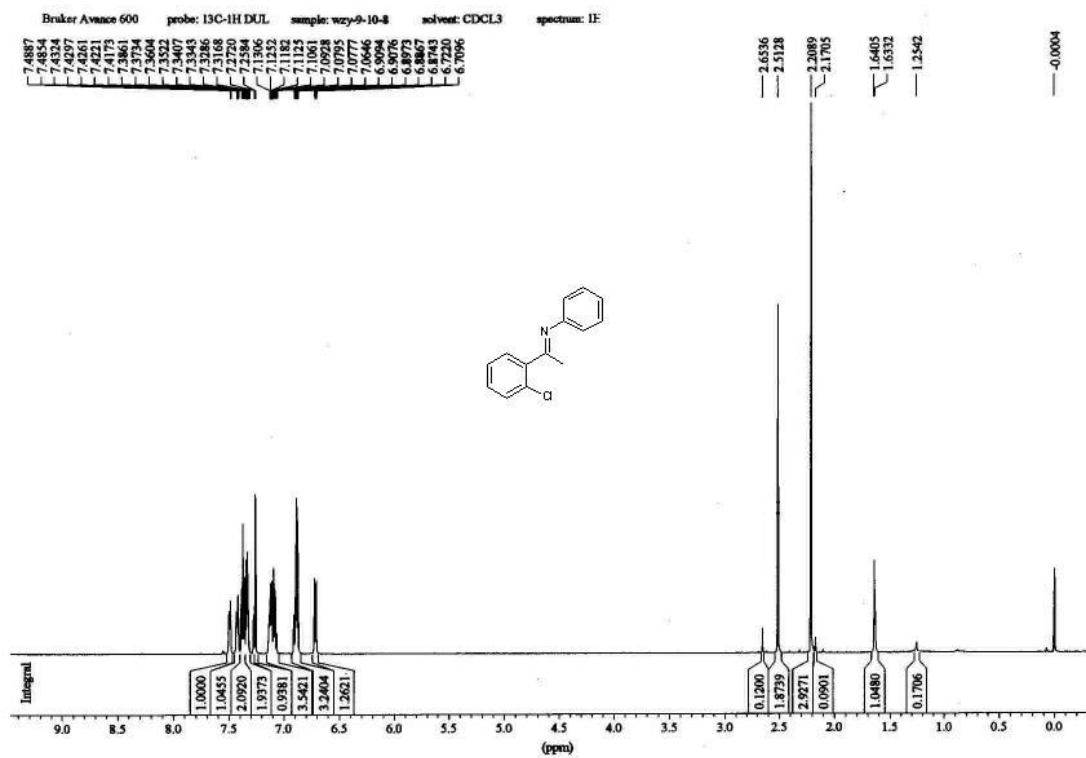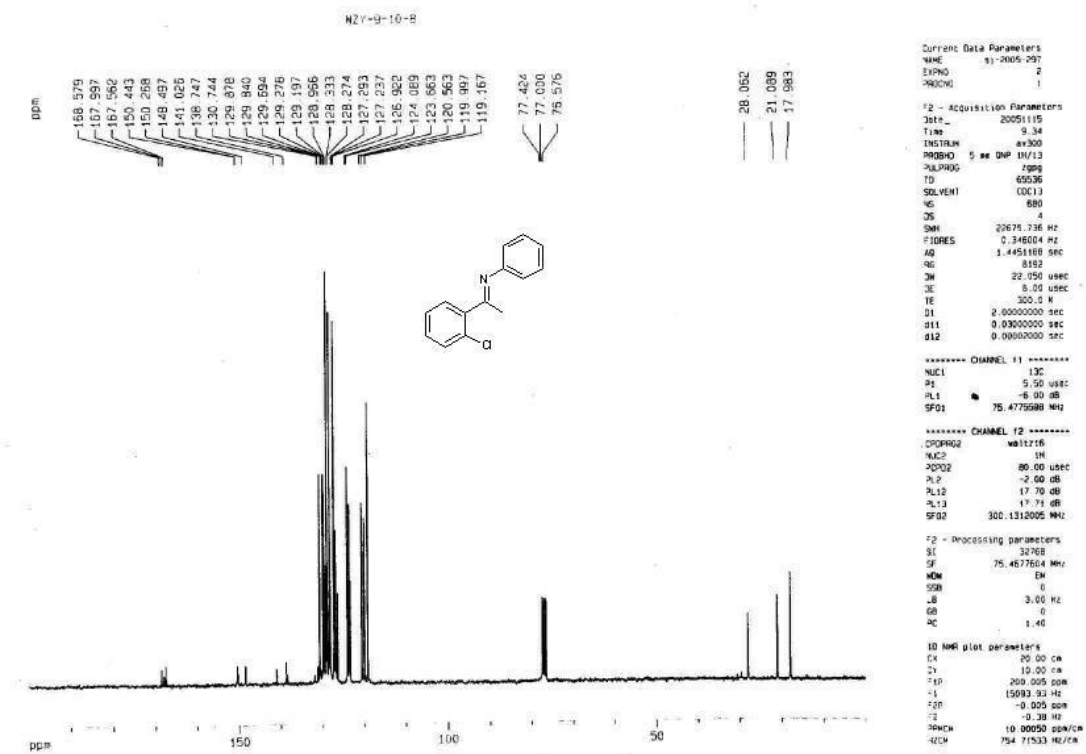



The NMR spectra of **1m**

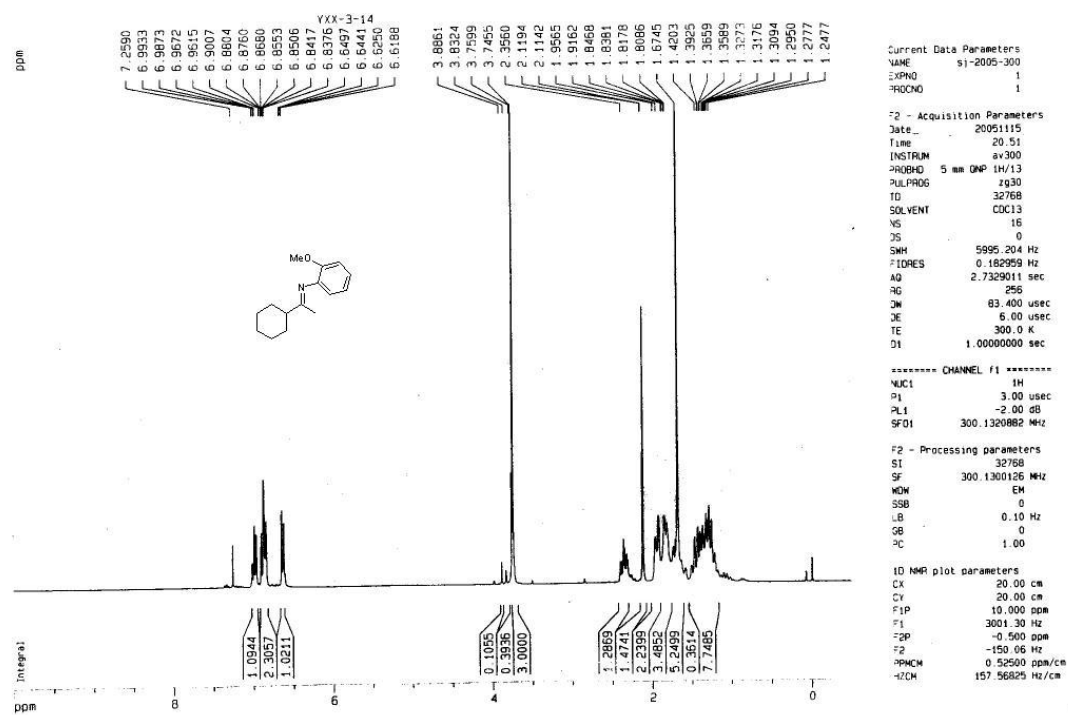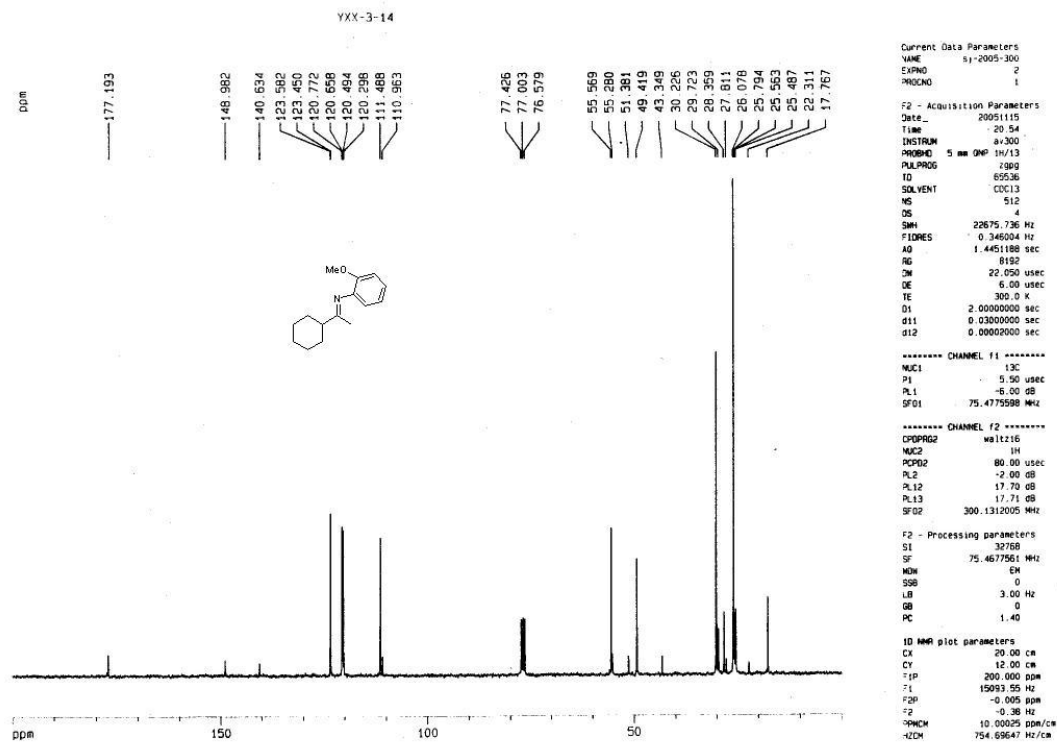

The NMR spectra of **1n**

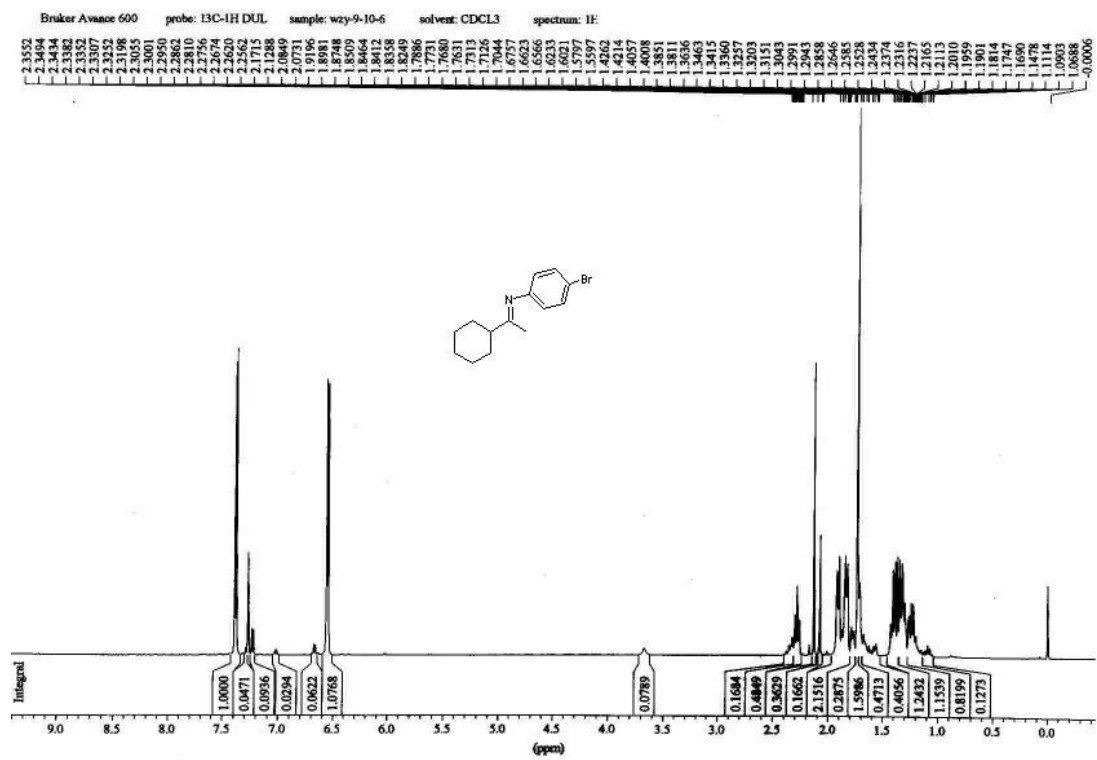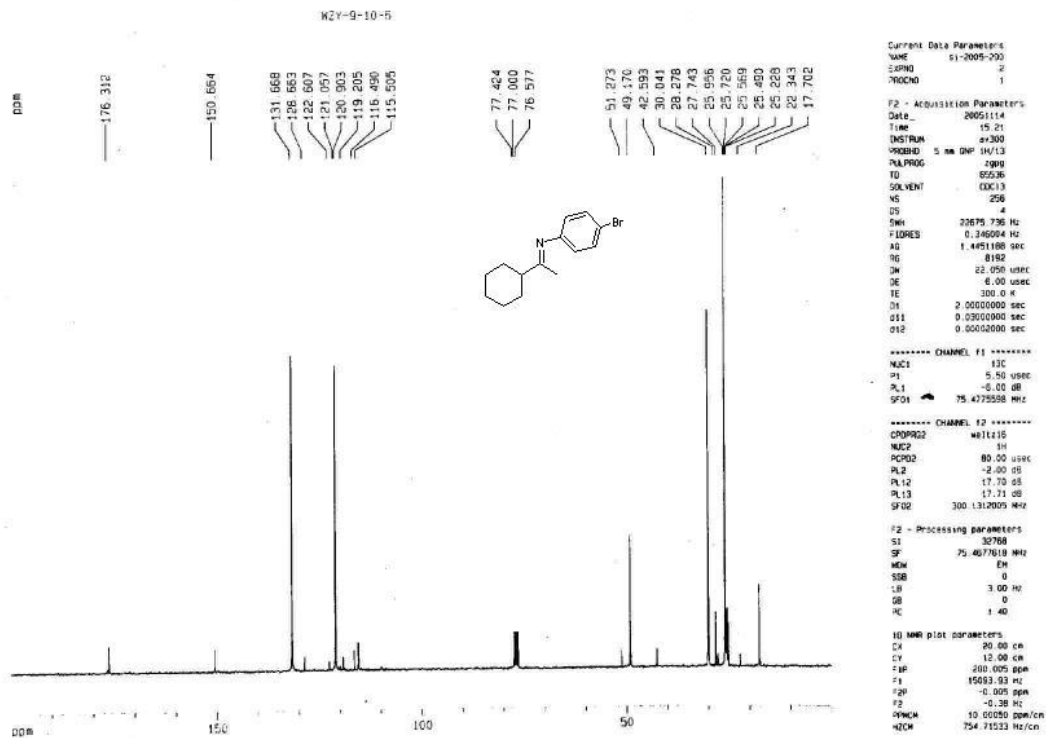



The NMR spectra of **1v**

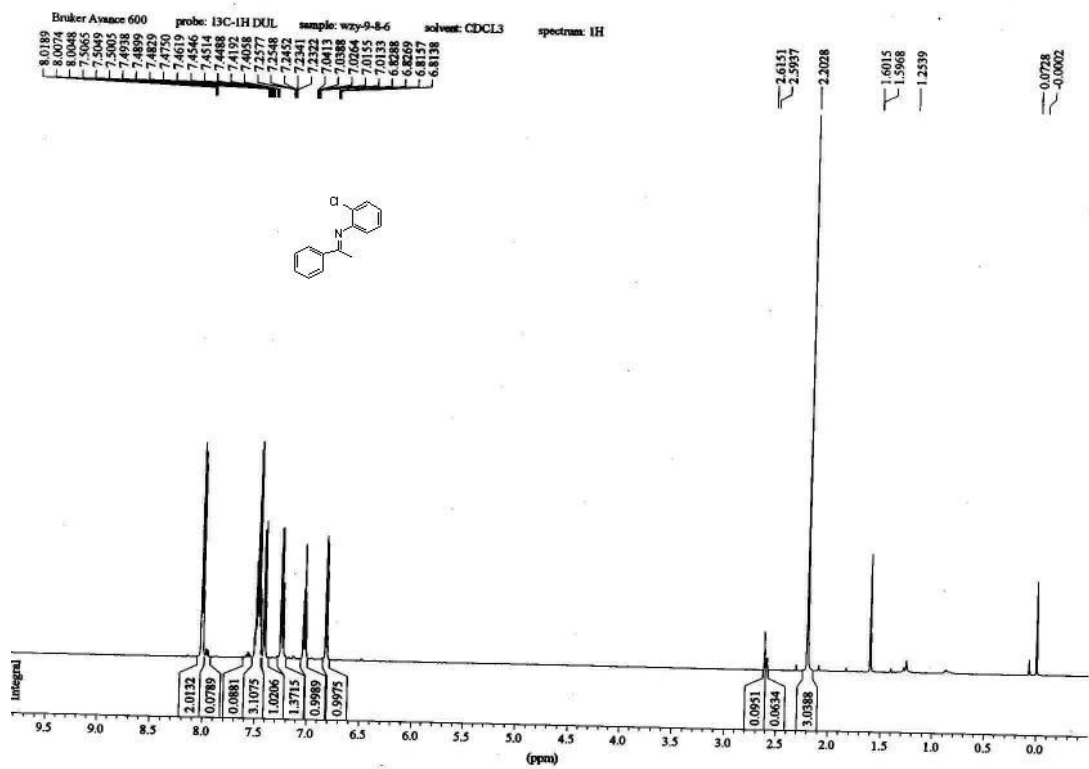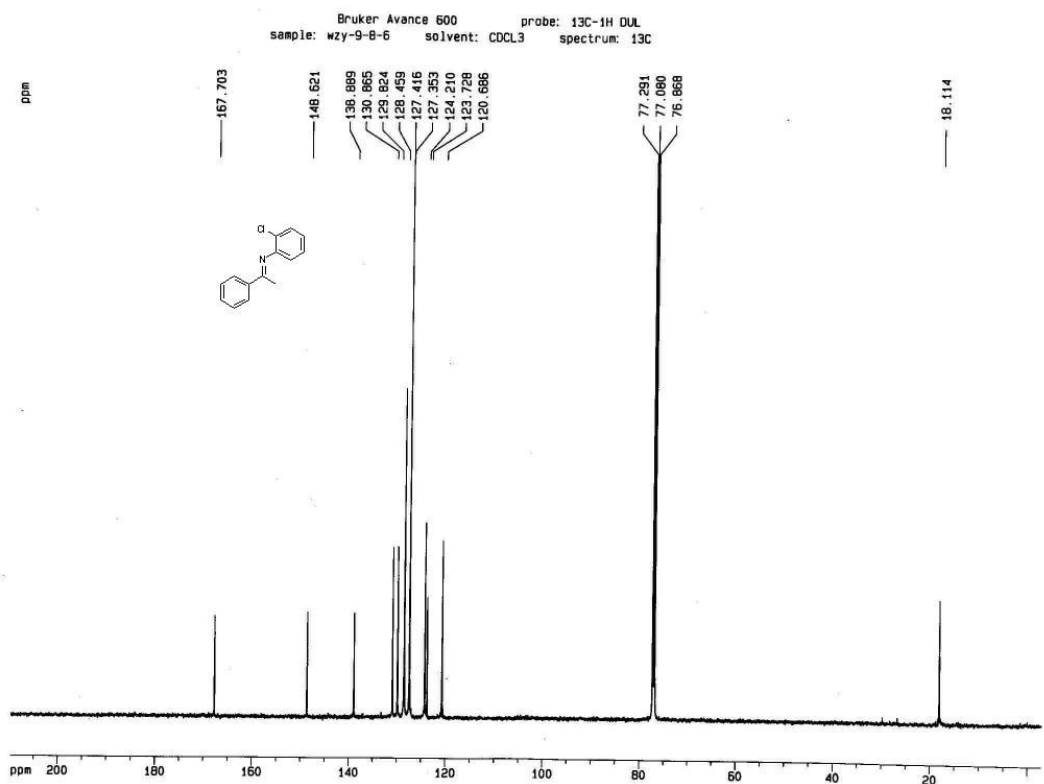

The NMR spectra of **1z**

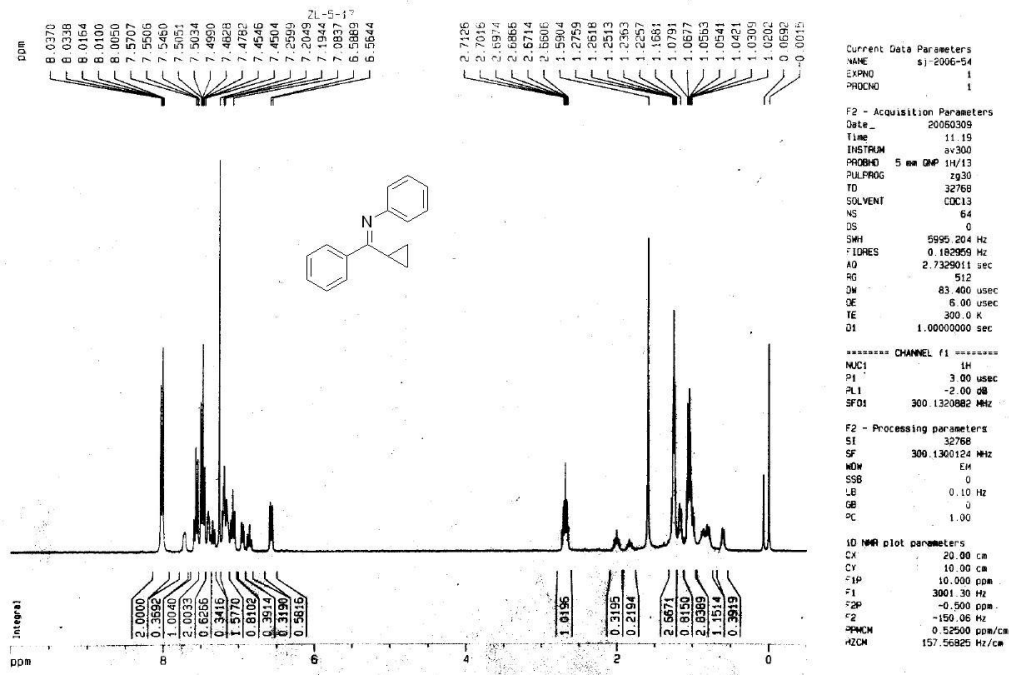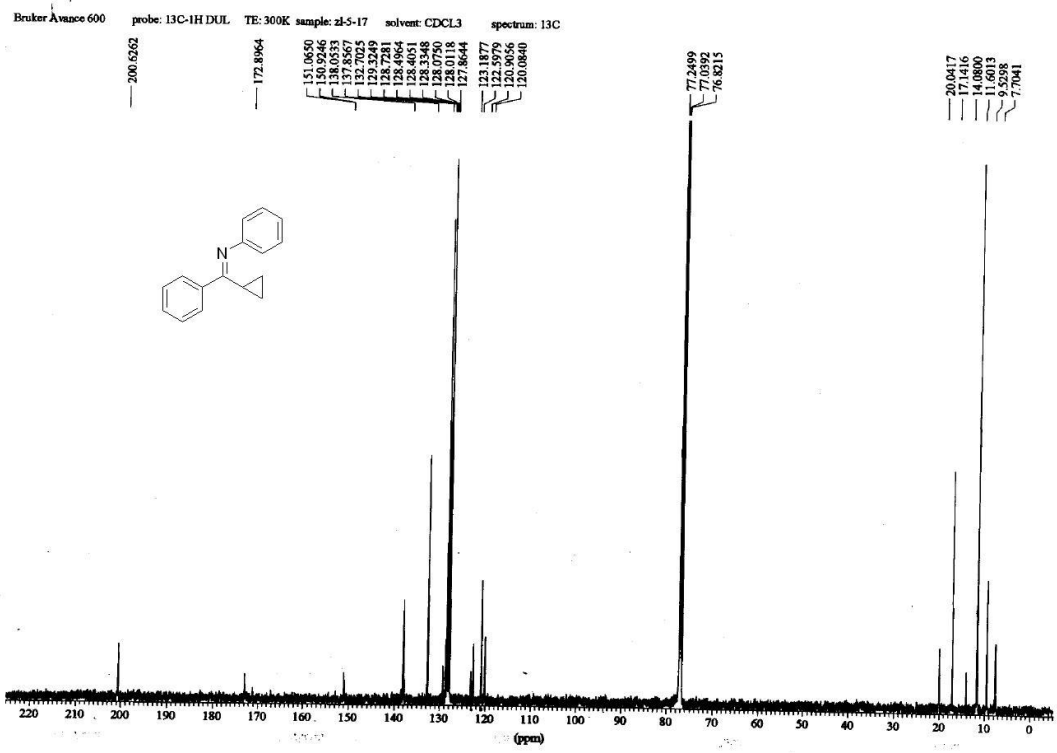

The NMR spectra of 1a'

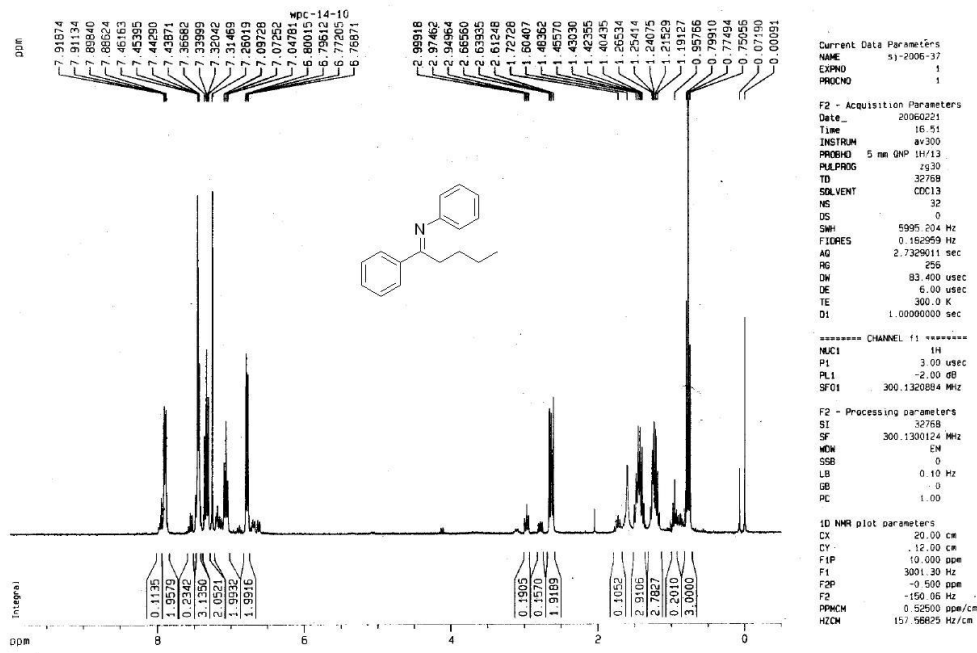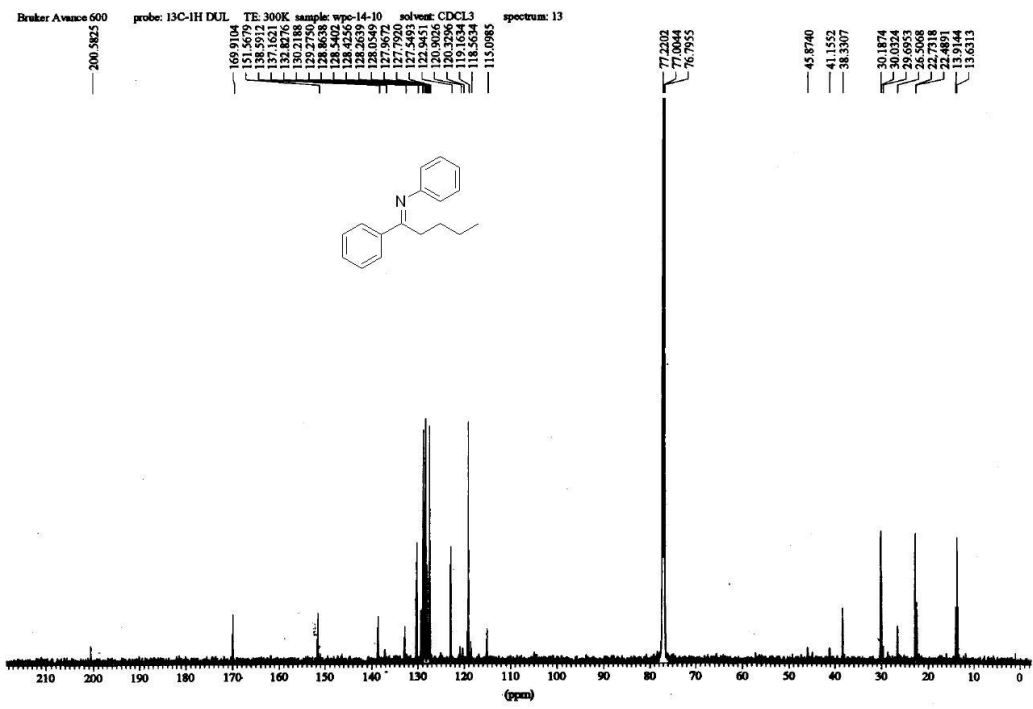

The NMR spectra of **2a**

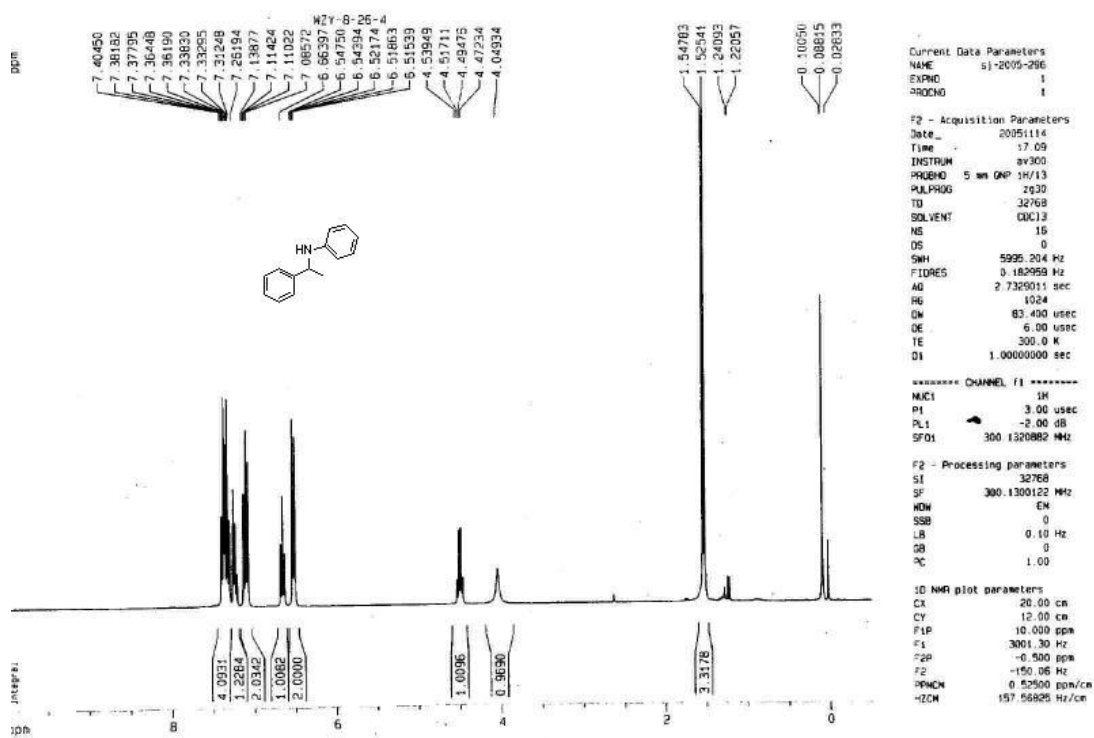

The NMR spectra of **2b**

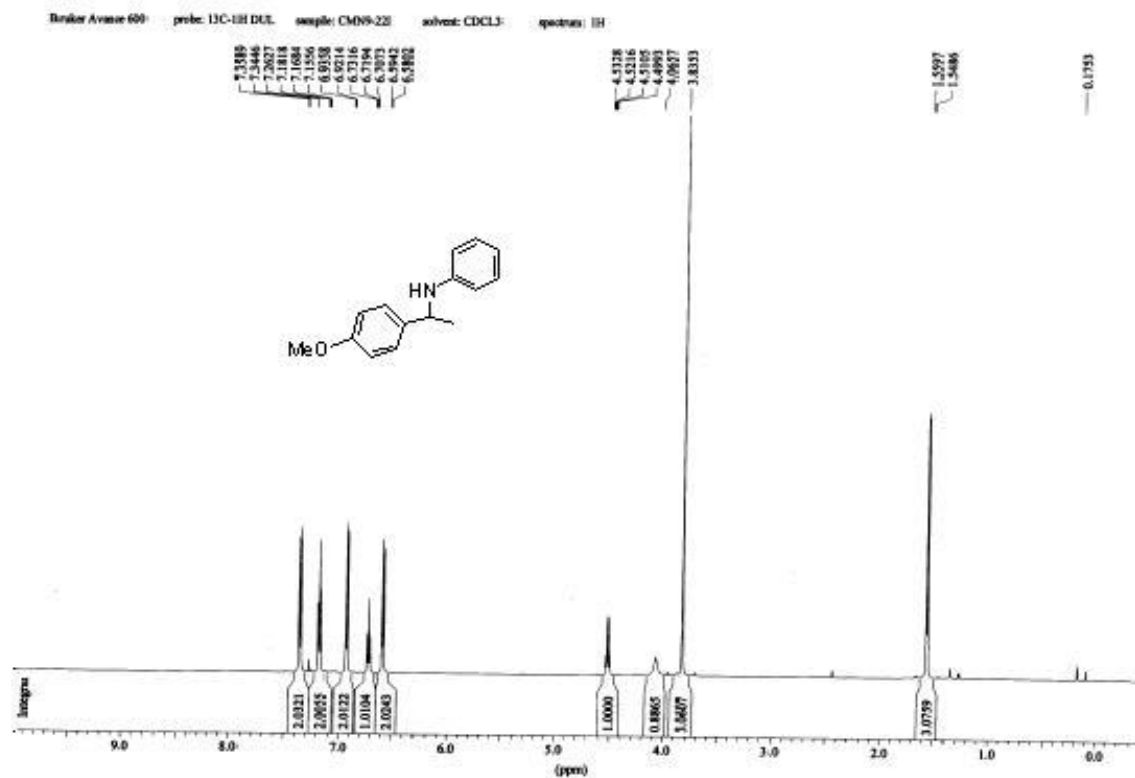

# The NMR spectra of **2c**

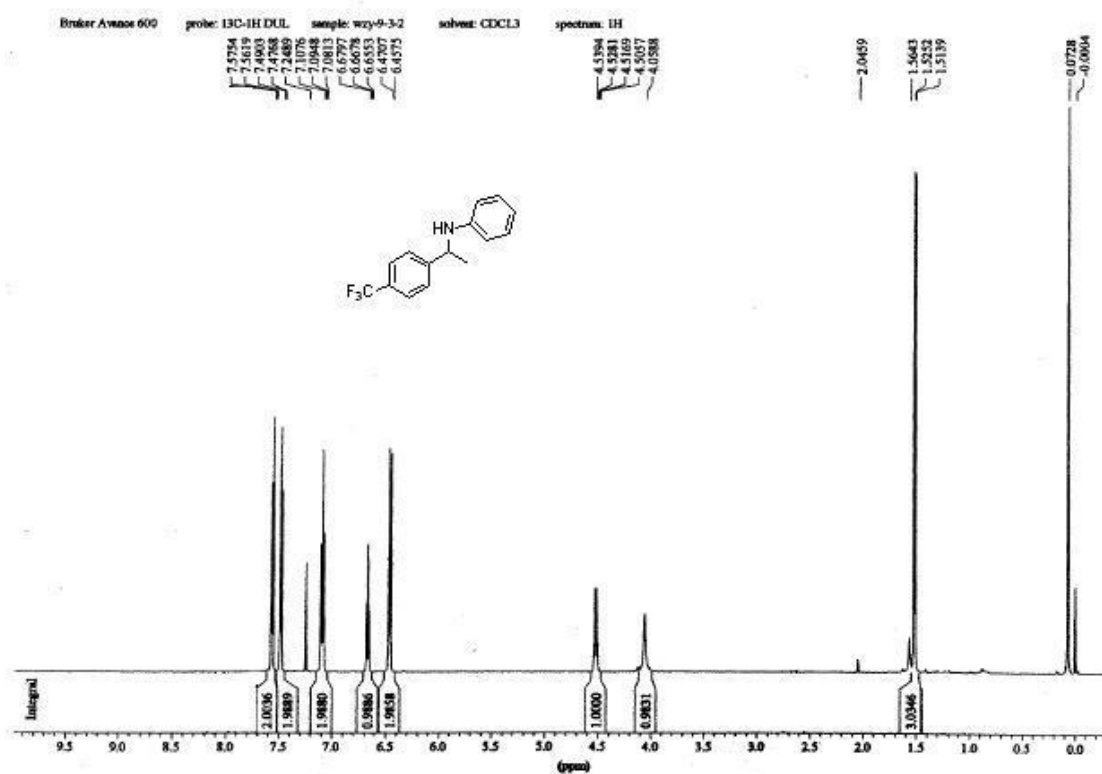

# The NMR spectra of **2d**

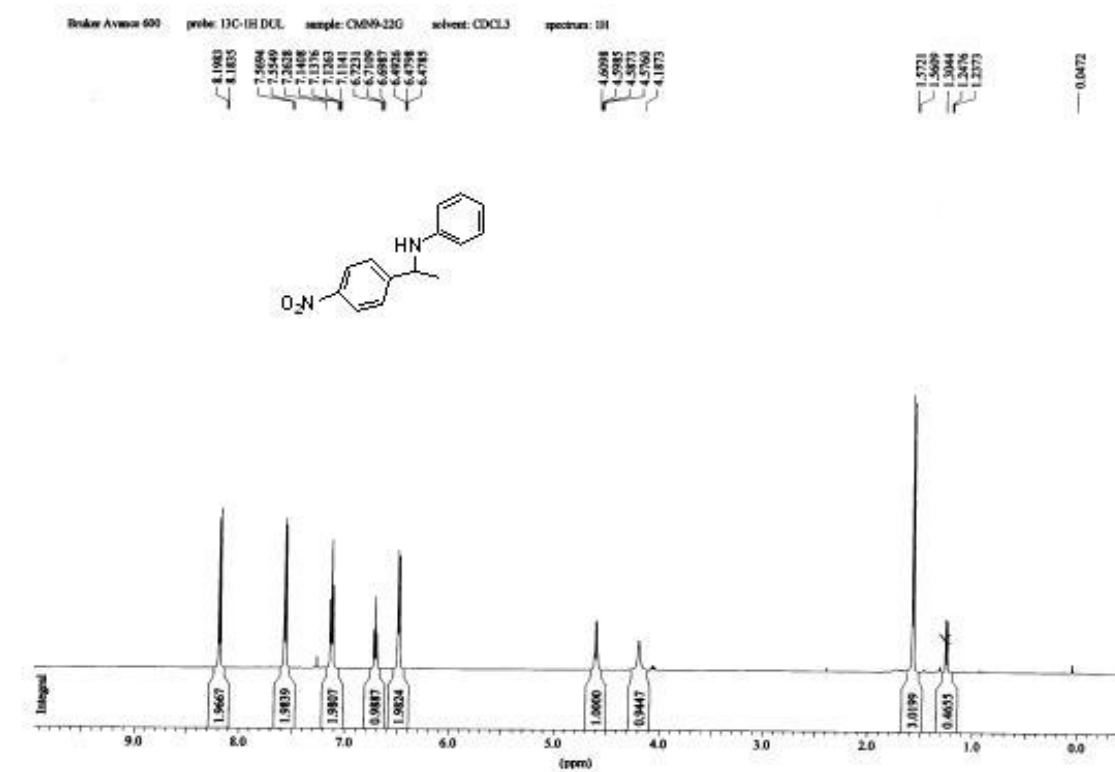



The NMR spectra of **2f**

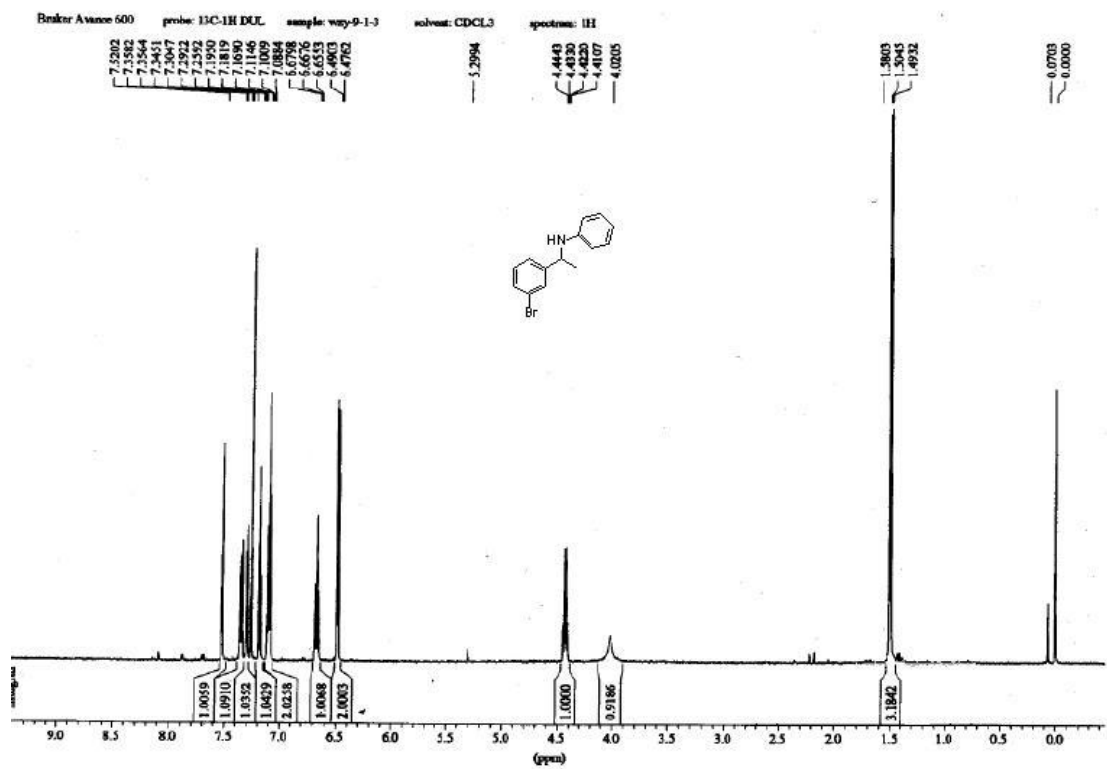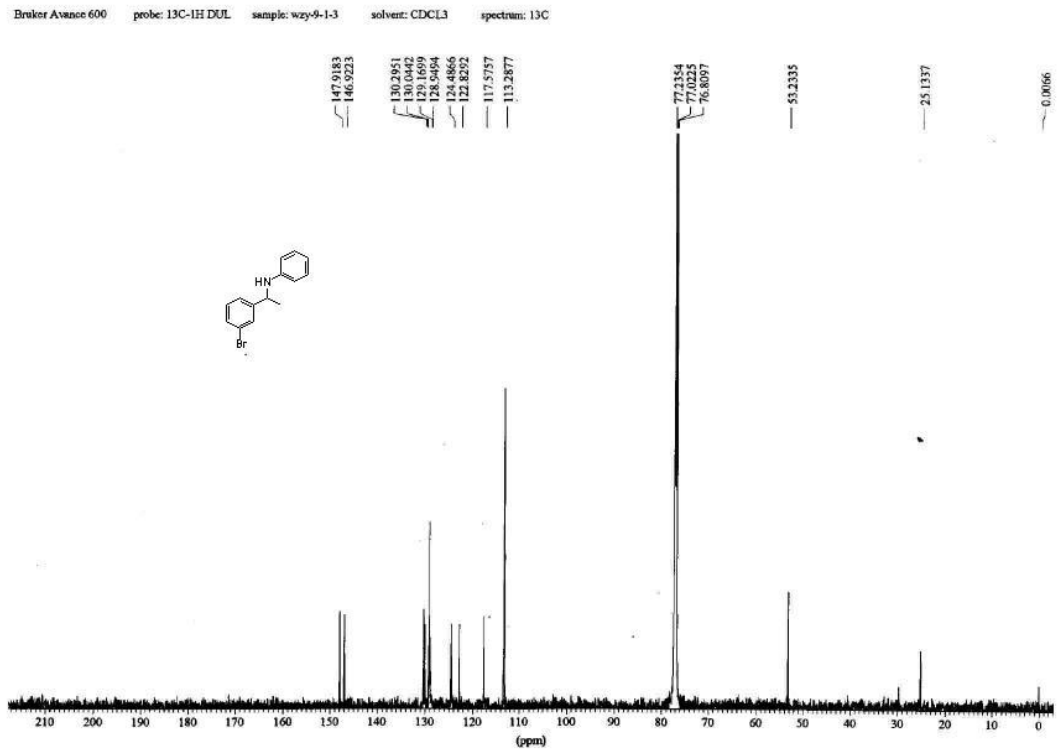

# The NMR spectra of **2g**

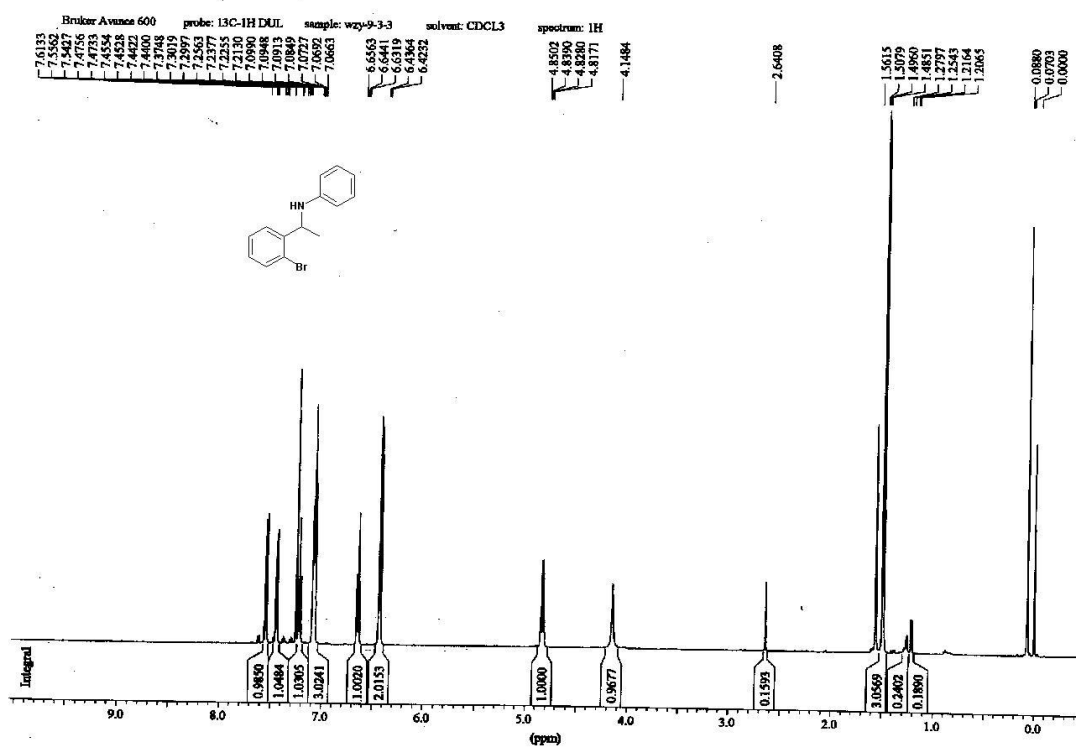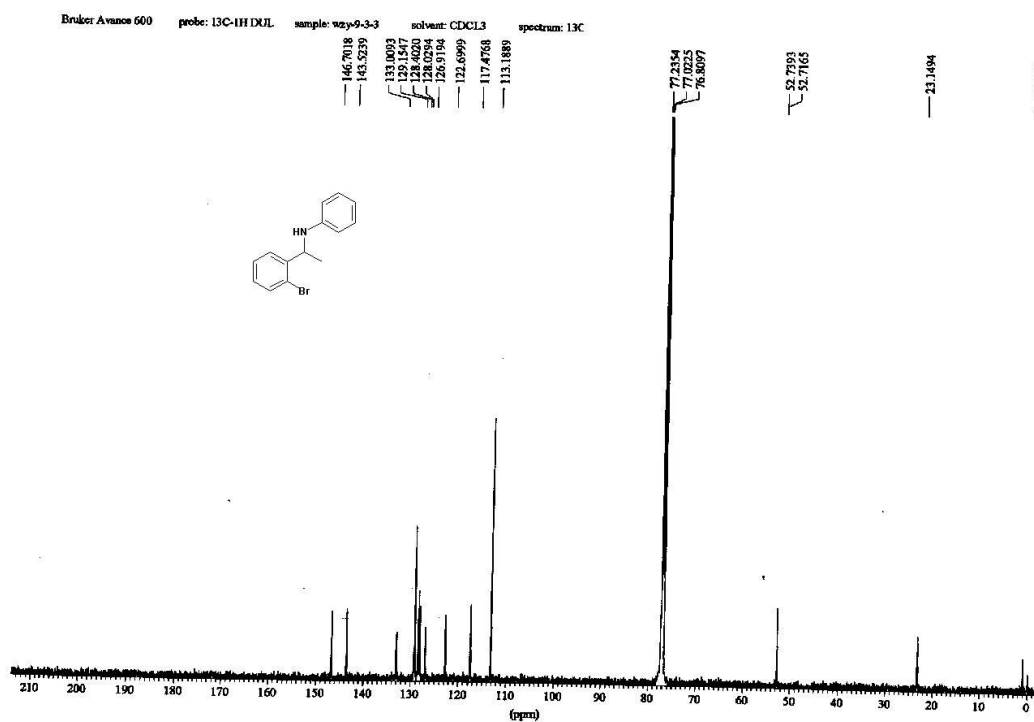

# The NMR spectra of **2h**

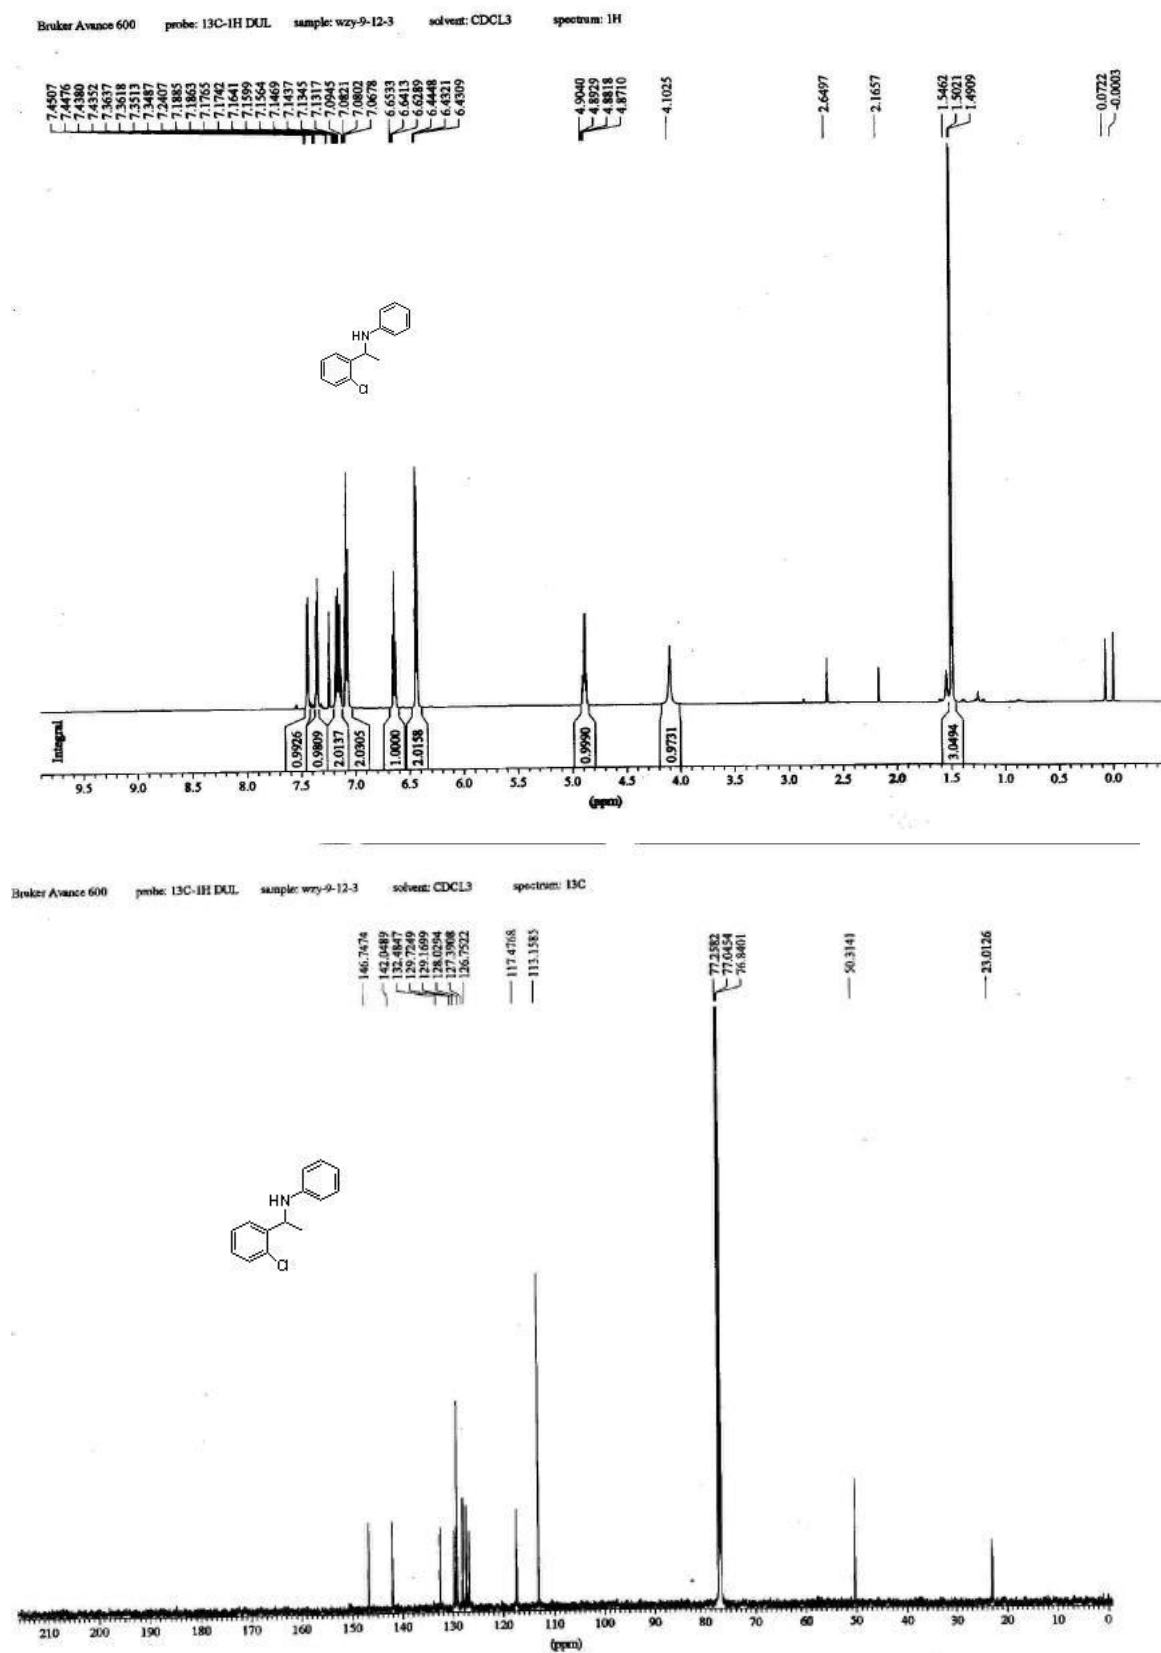

The NMR spectra of **2i**

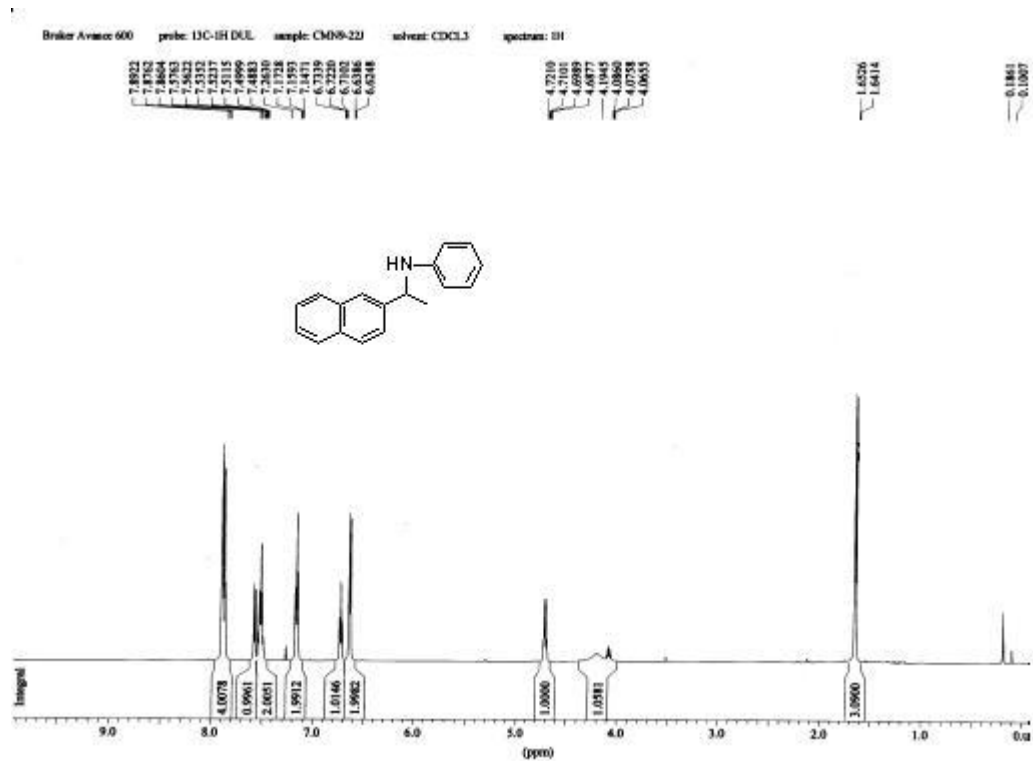

# The NMR spectra of **2j**

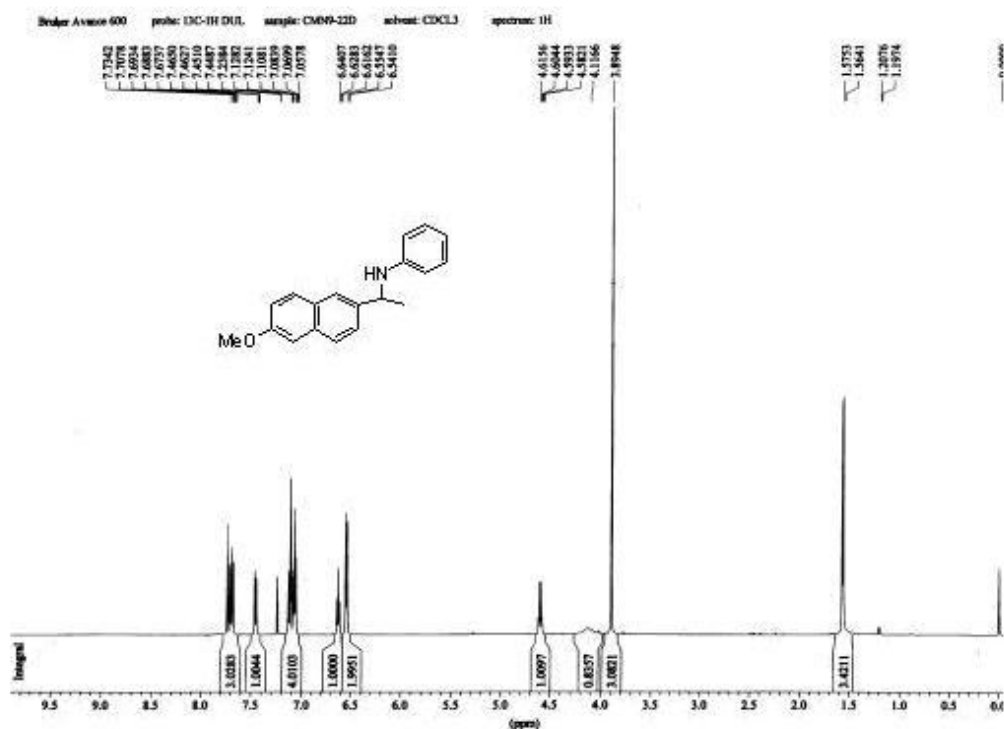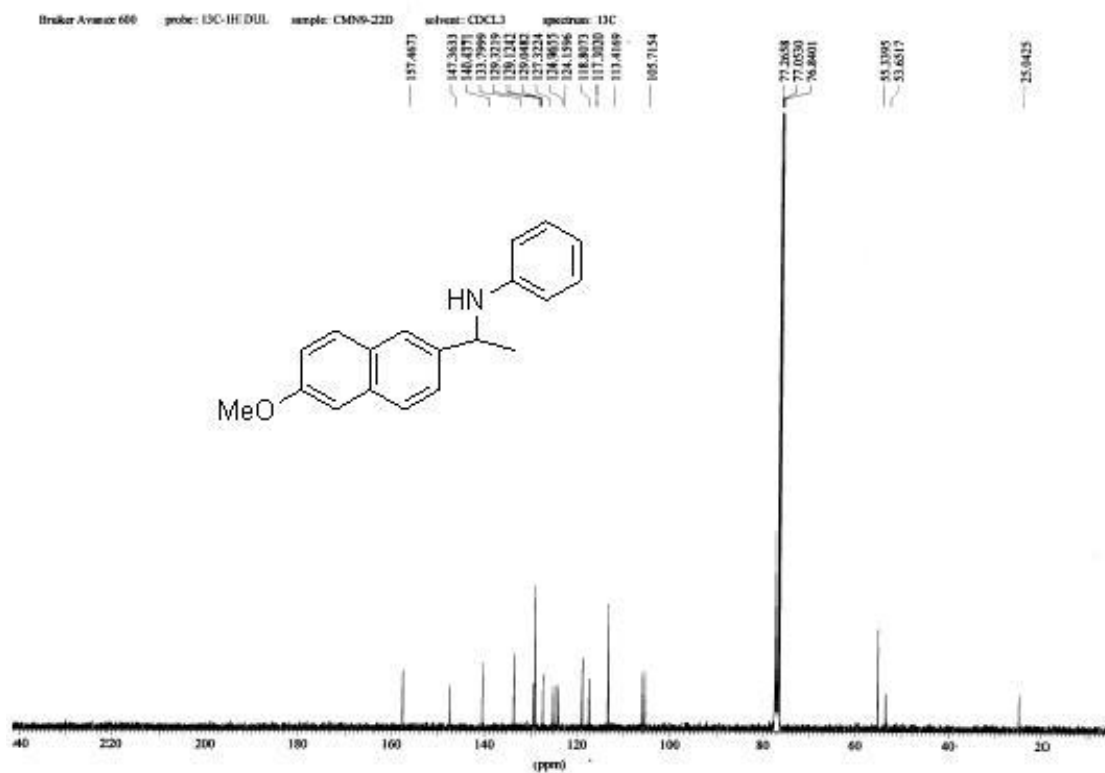

## The NMR spectra of 2k

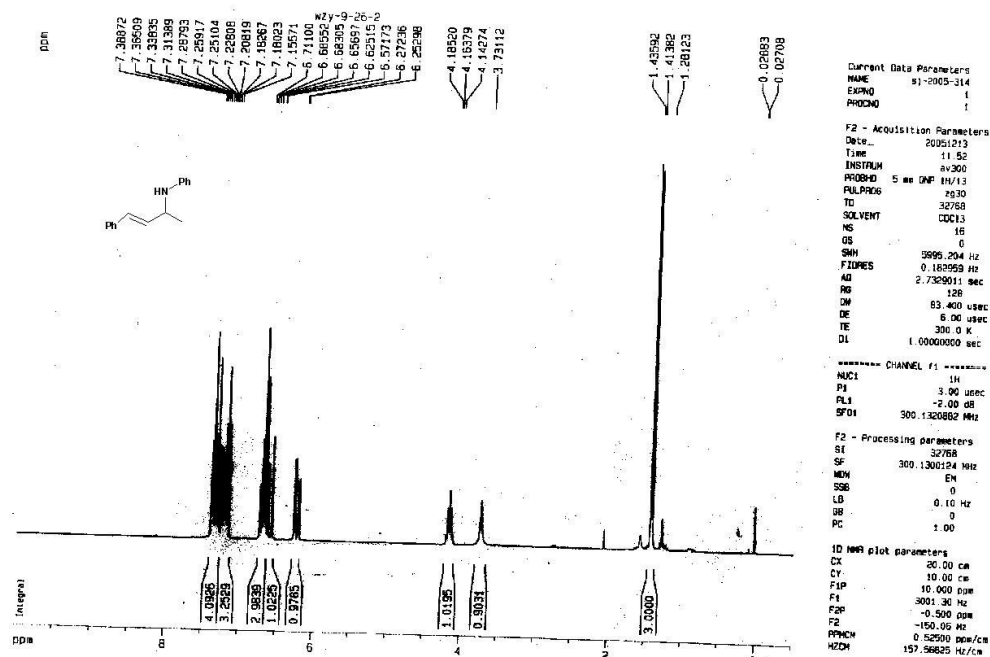

## The NMR spectra of 2l

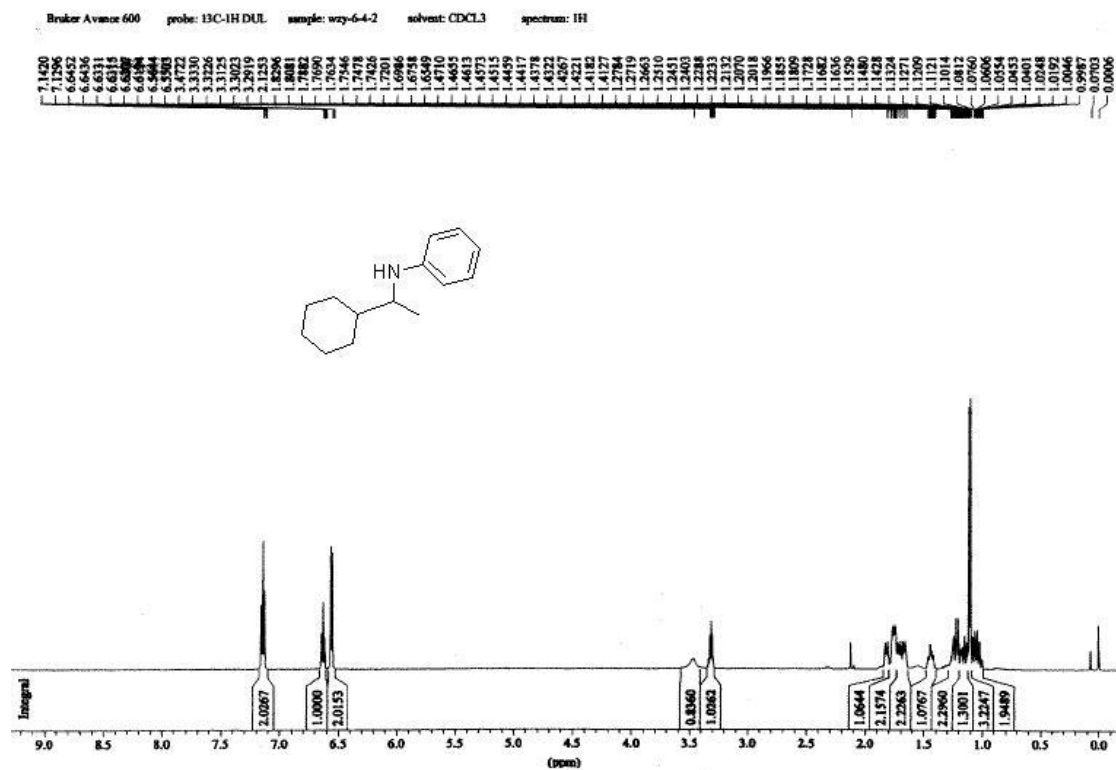

The NMR spectra of **2m**

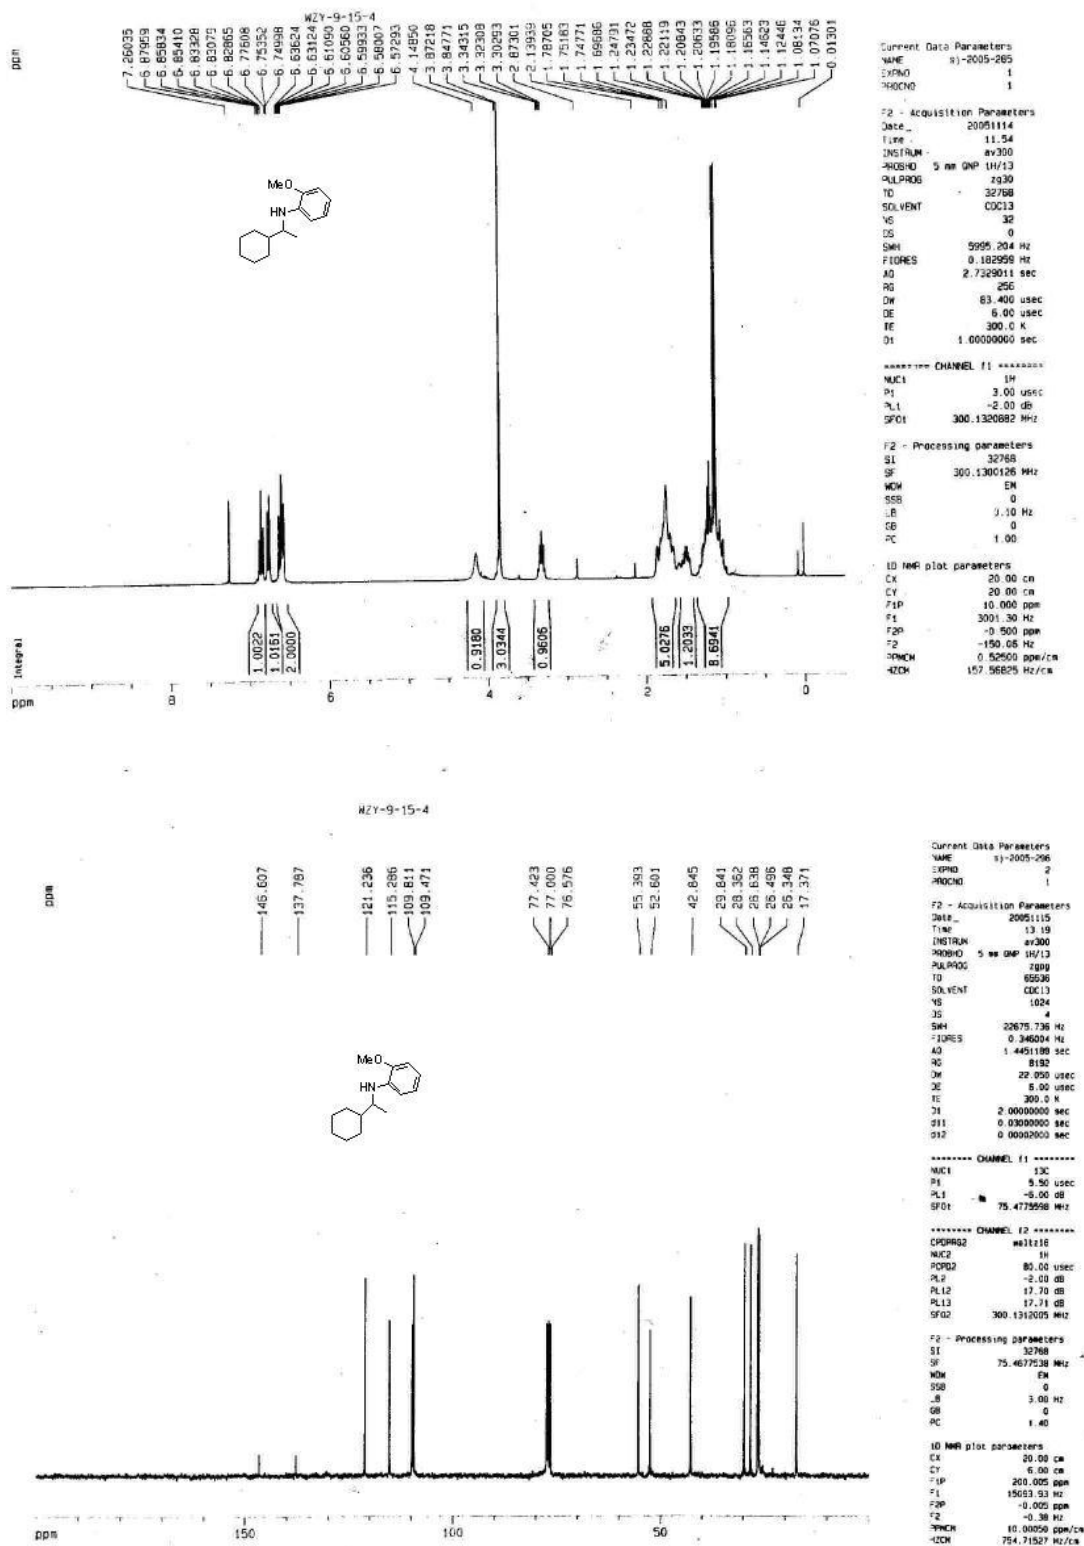

The NMR spectra of **2n**

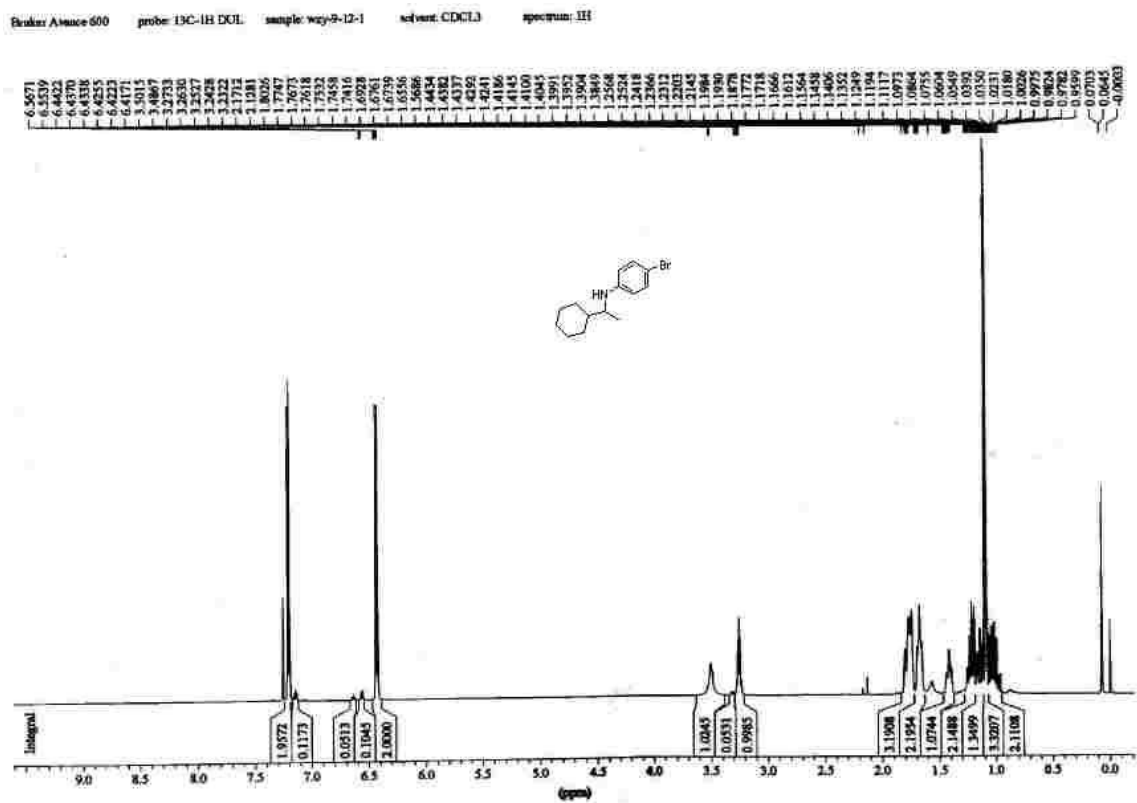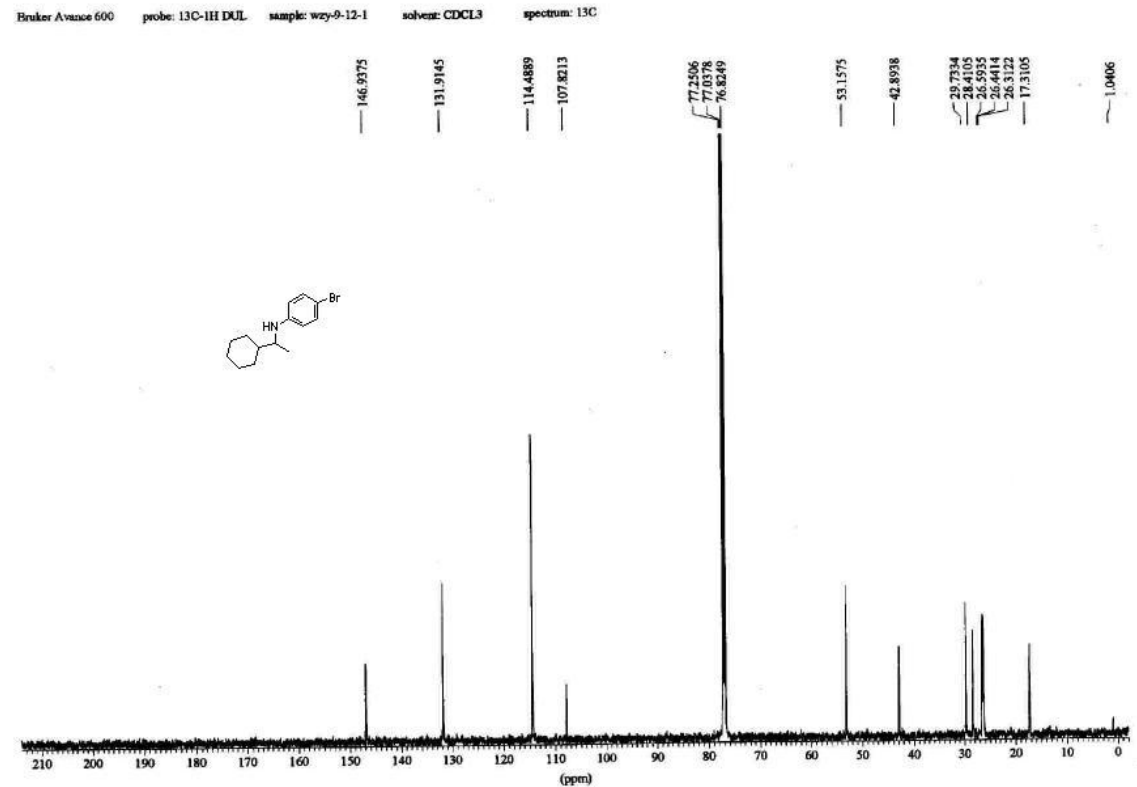

The NMR spectra of **2o**

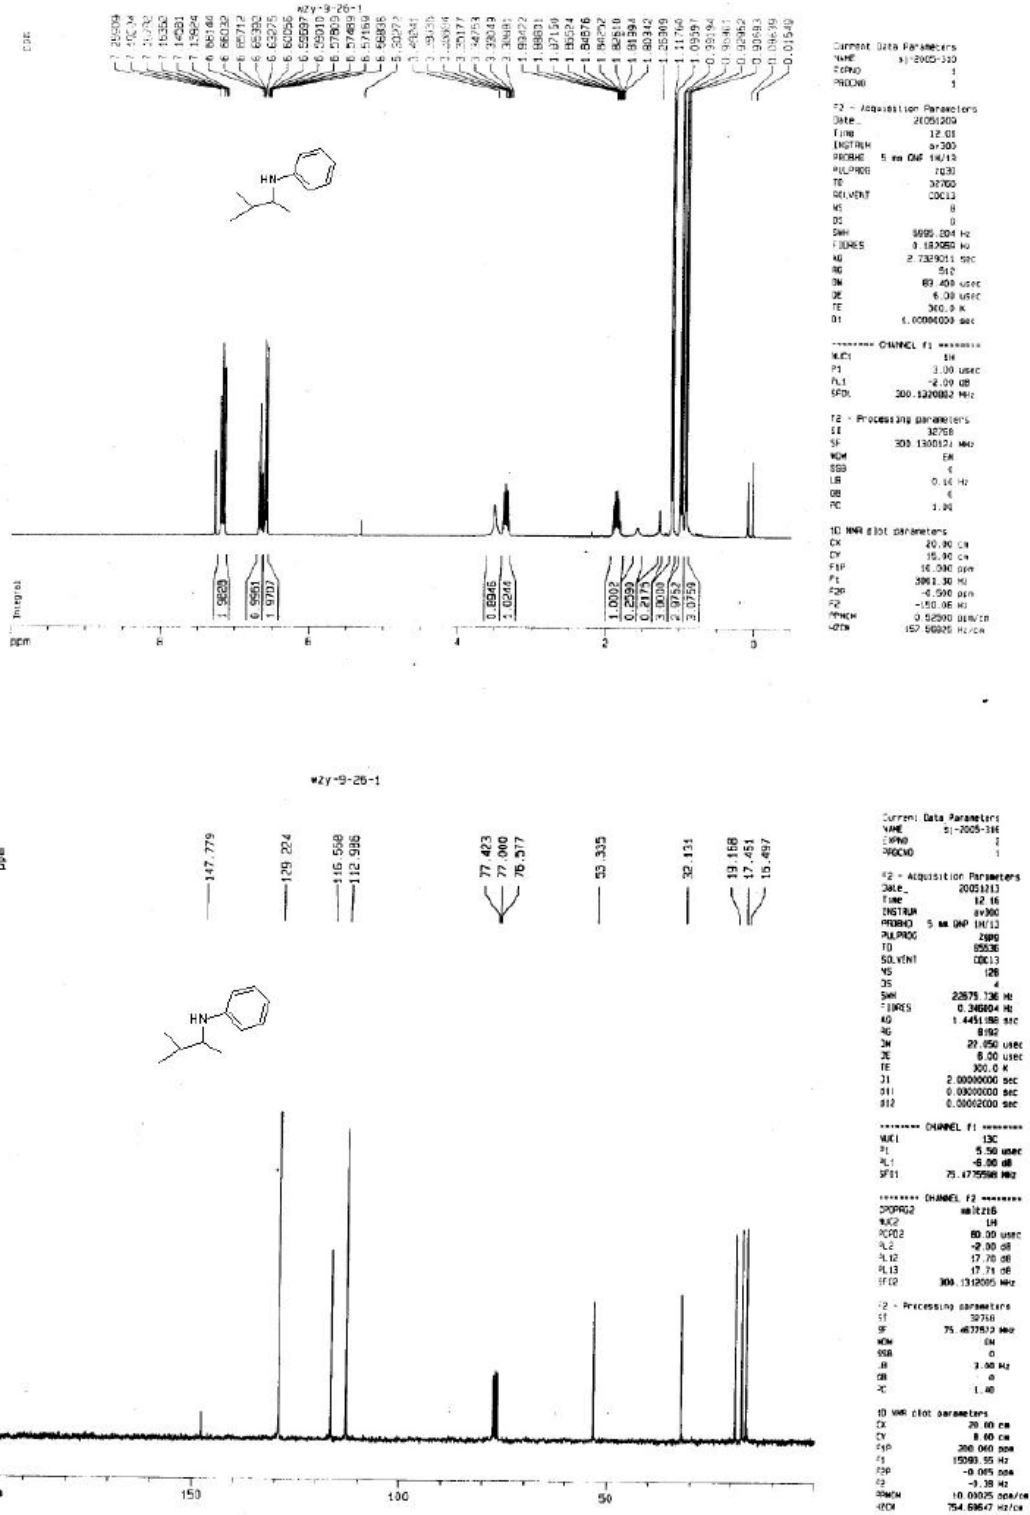

### The NMR spectra of **2p**

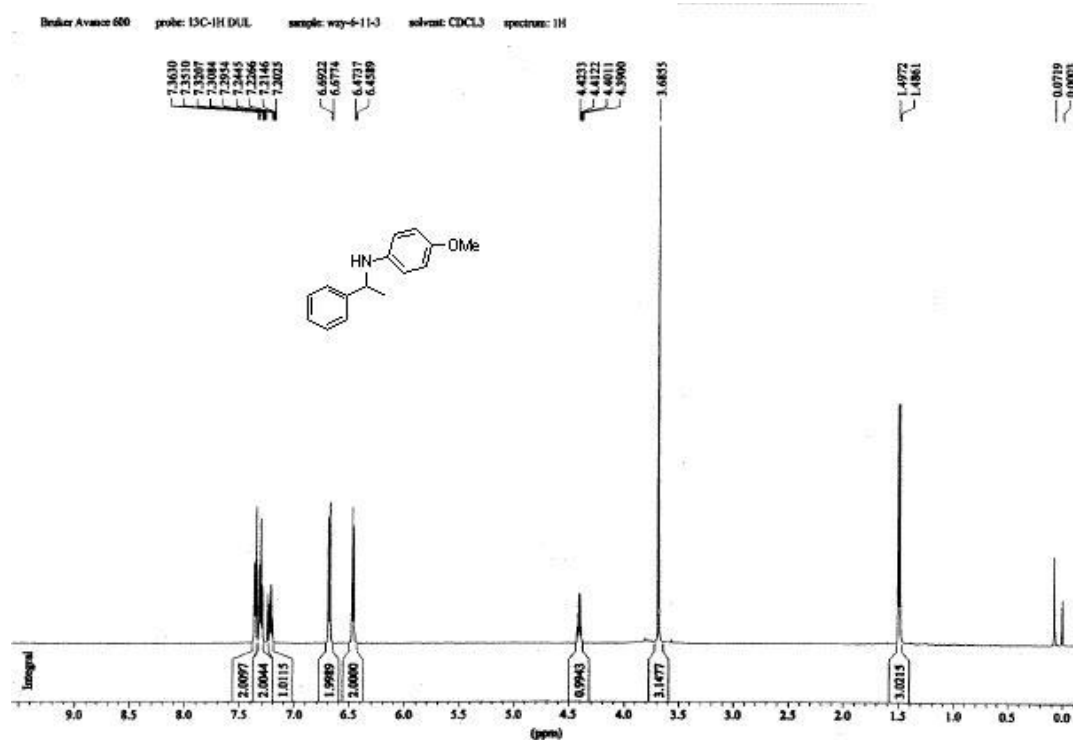

### The NMR spectra of **2r**

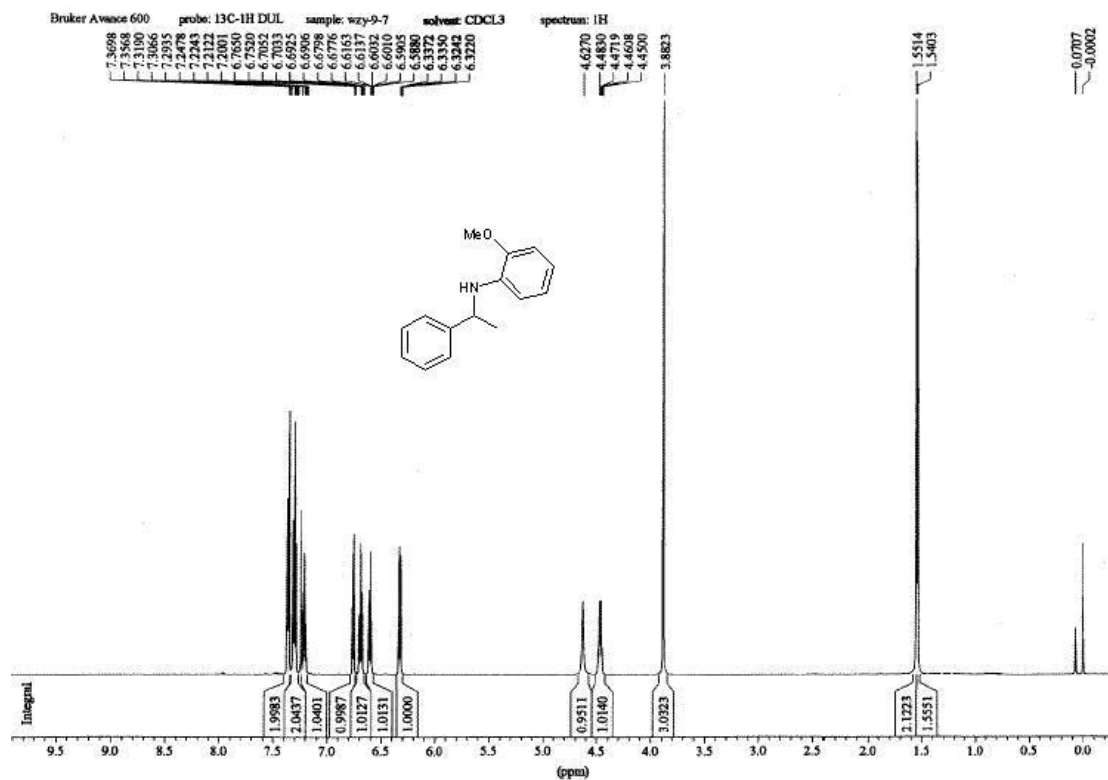

# The NMR spectra of **2s**

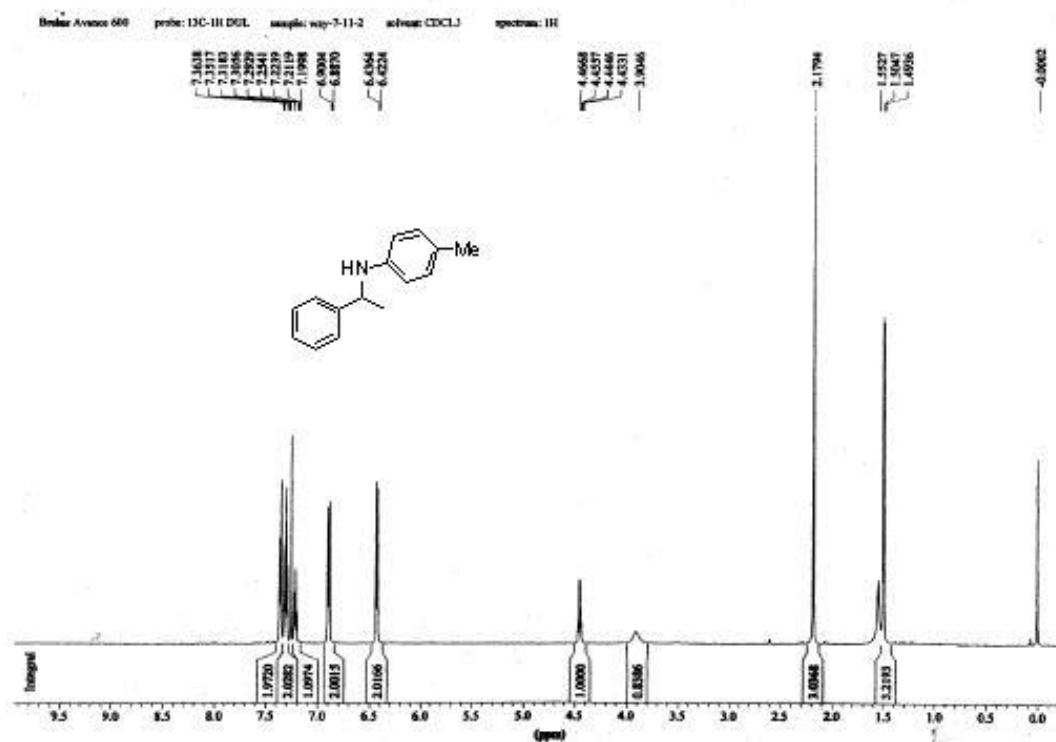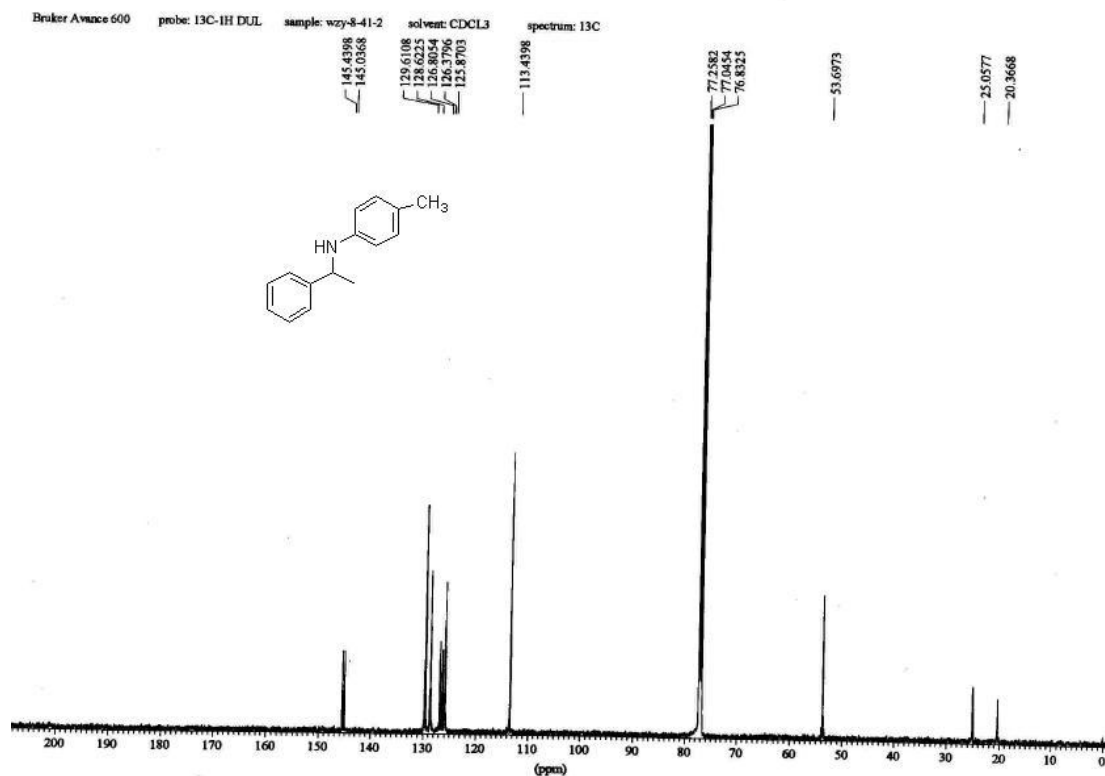

The NMR spectra of **2t**

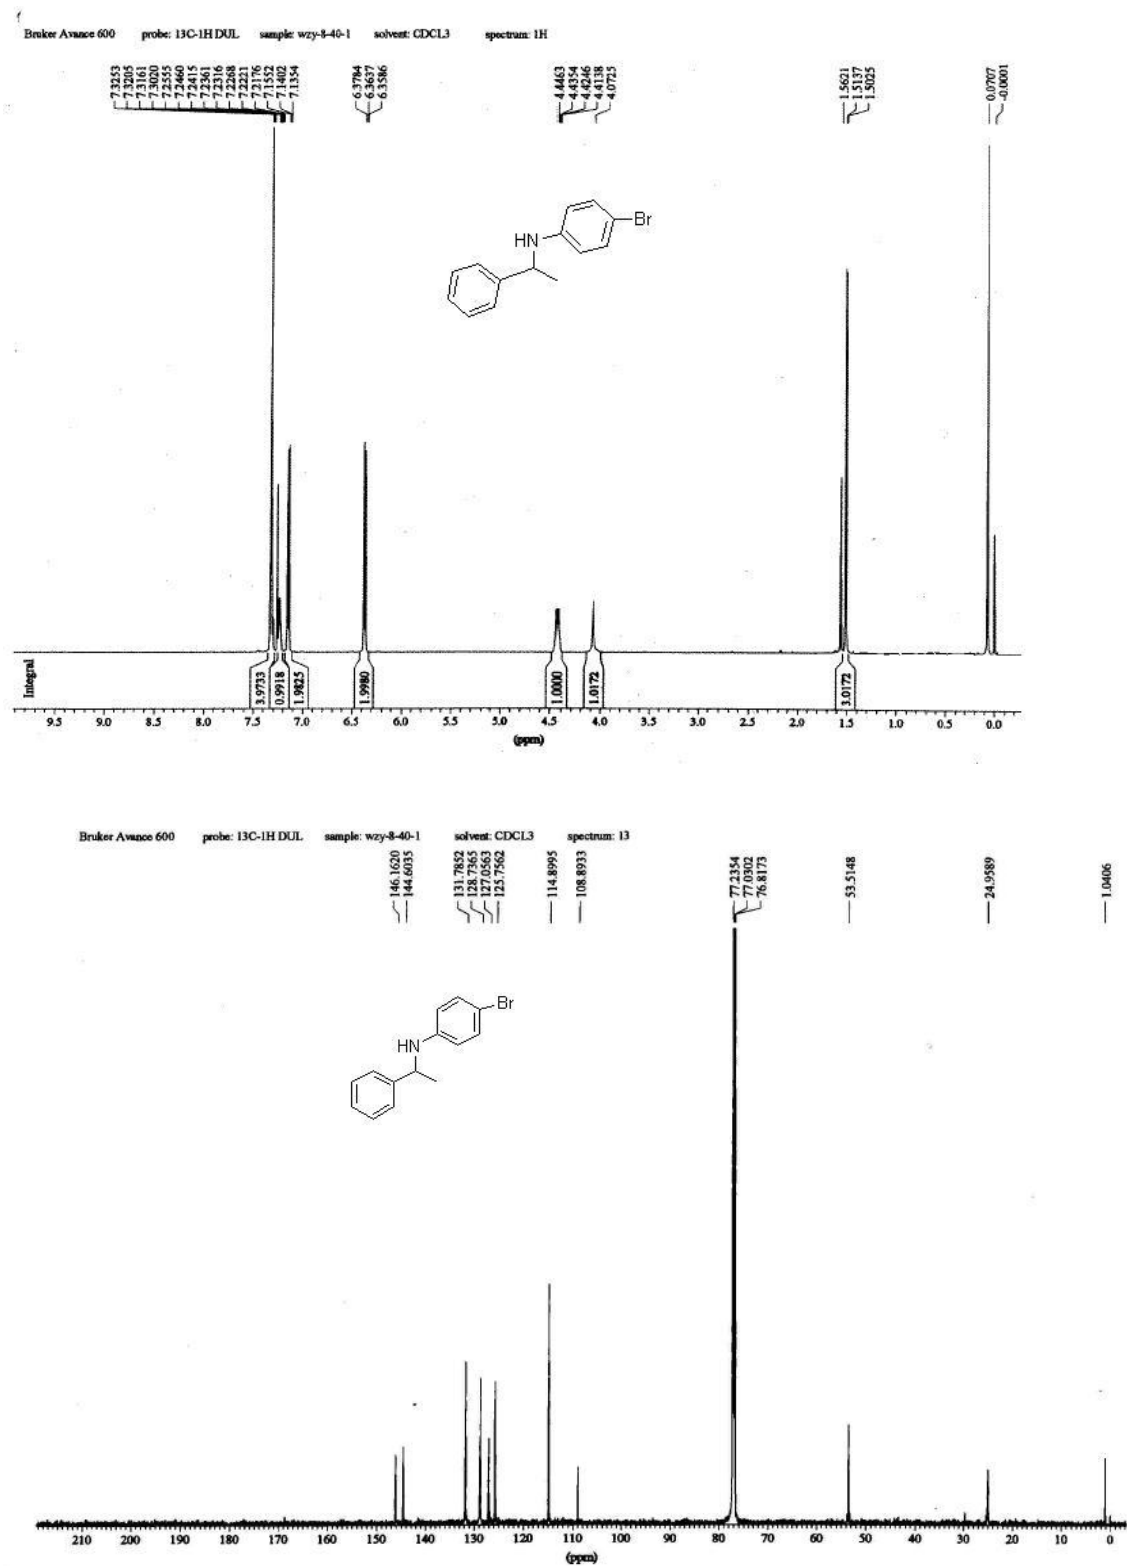

# The NMR spectra of **2u**

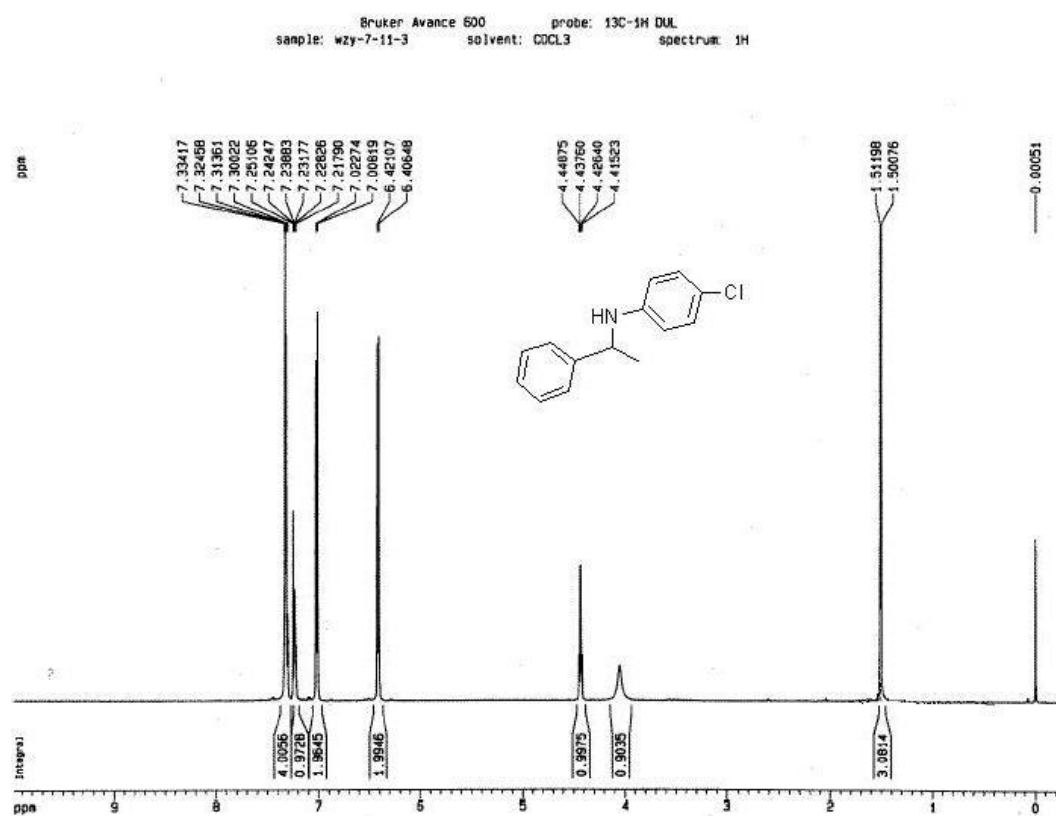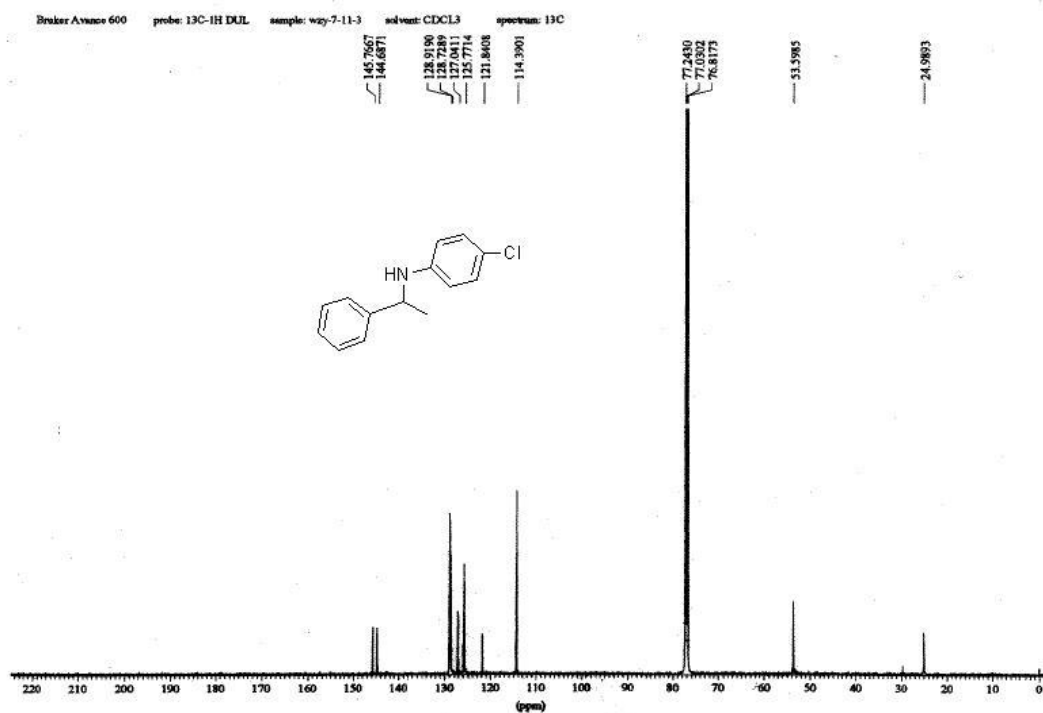

The NMR spectra of **2v**

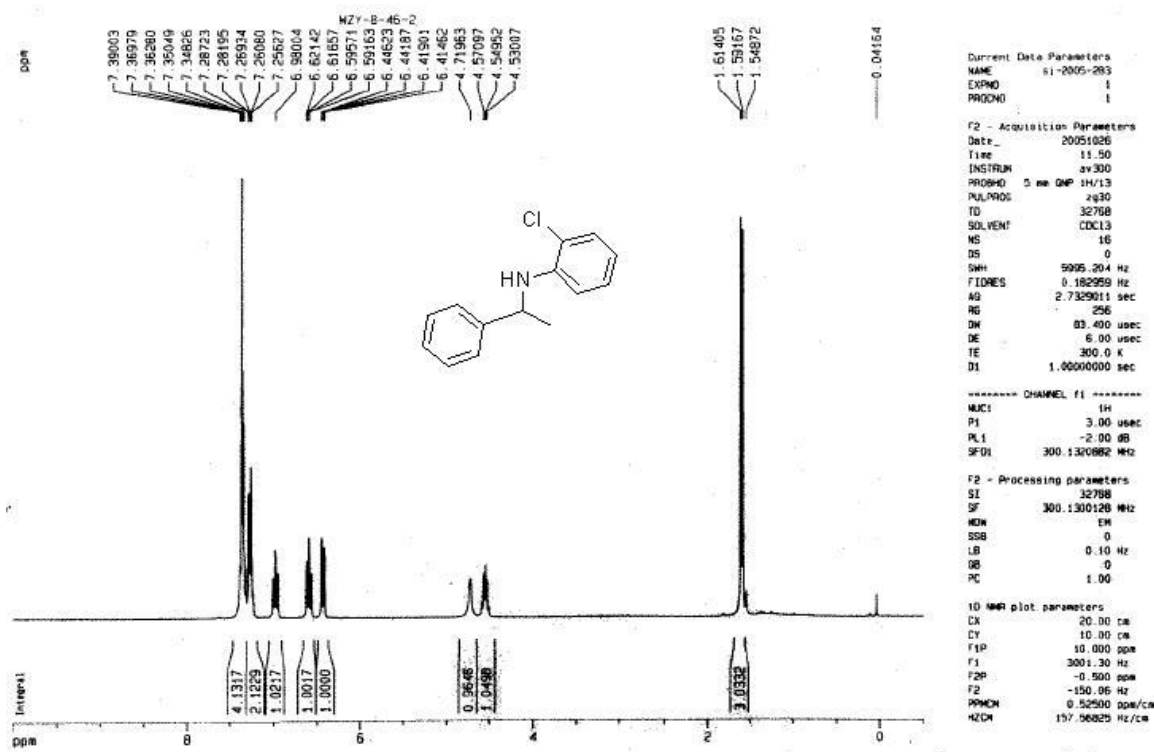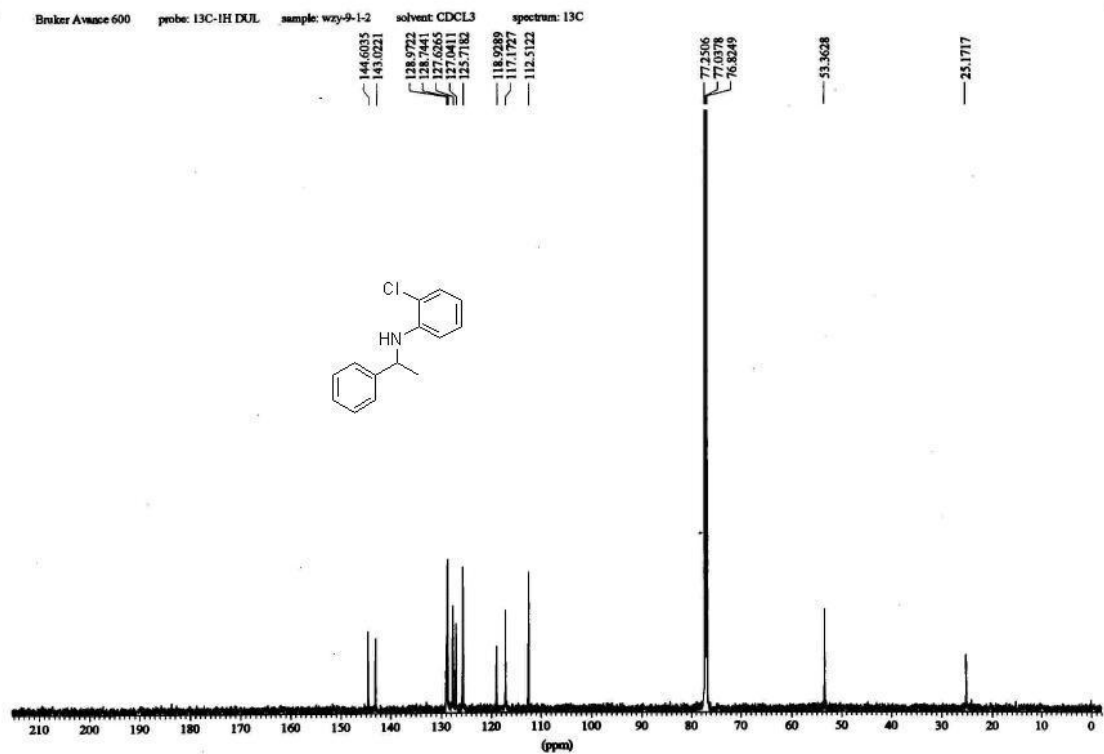

# The NMR spectra of **2z**

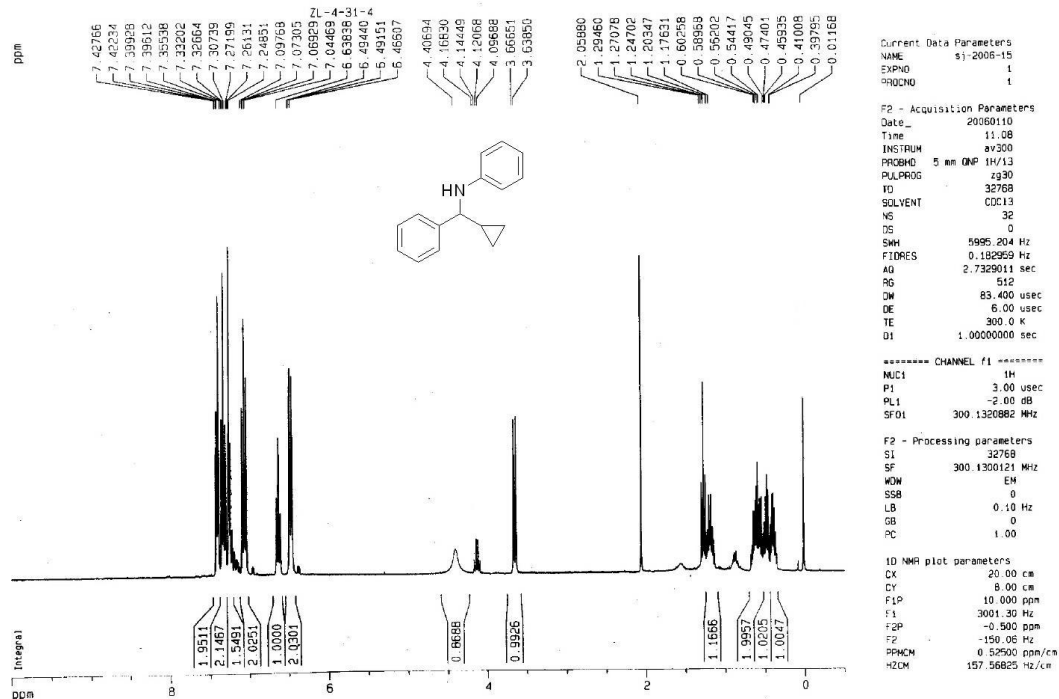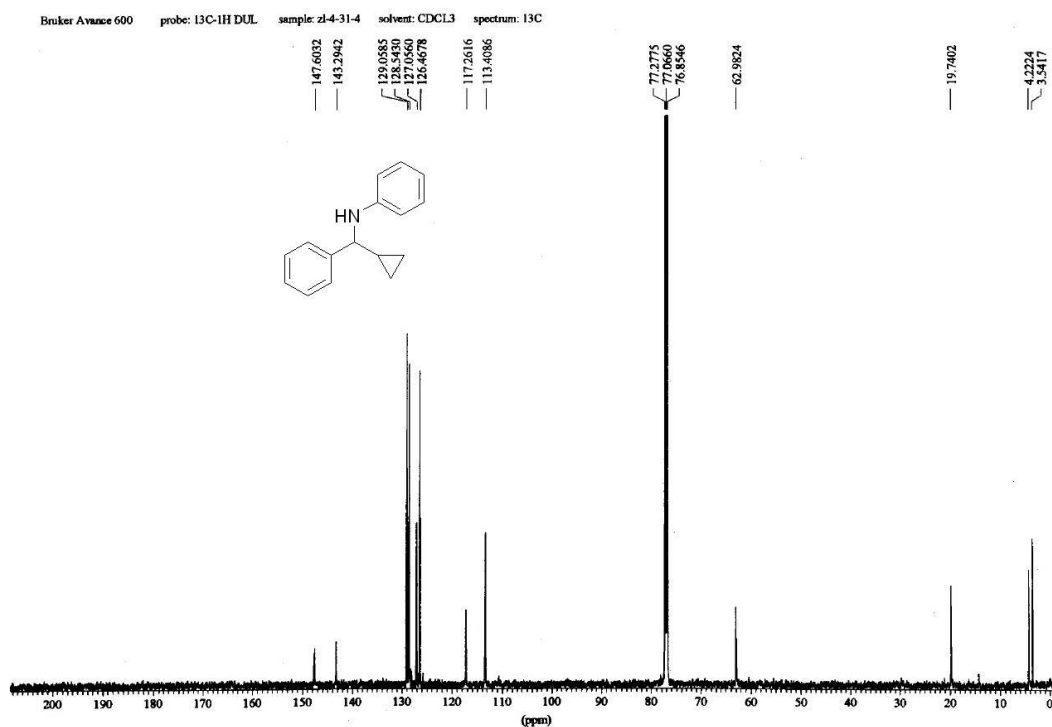



The HPLC spectra of 2a

Page 1 of 1

Software Version : 6.2.1.0.104:0104  
Sample Name : wzy5-13-2  
Instrument Name : HPLC  
Rack/Vial : 0/0  
Sample Amount : 1.000000  
Cycle : 1  
Date : 2005-11-2 13:56:20  
Data Acquisition Time : 2005-5-18 9:57:42  
Channel : A  
Operator : manager  
Dilution Factor : 1.000000

Result File : D:\LC\wzy\Ph-CH(NH-Ph)-CH3\050518-5-13-2.rst  
Sequence File : C:\PenExe\TcWS\Ver6.2.1\Examples\050518-5-13-1-20050518-095515.seq

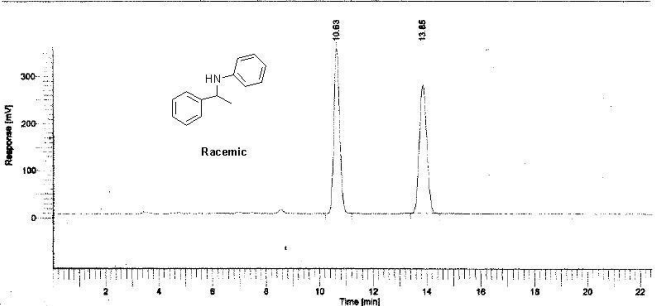

DEFAULT REPORT

| Peak # | Time [min] | Area [uV*sec] | Height [uV] | Area [%] |
|--------|------------|---------------|-------------|----------|
| 1      | 10.630     | 5214192.14    | 350277.69   | 50.06    |
| 2      | 13.854     | 5200859.45    | 272623.31   | 49.94    |
|        |            | 10415051.58   | 622901.00   | 100.00   |

Missing Component Report  
Component Expected Retention (Calibration File)  
PE serie200 0.001

Time [min]

Page 1 of 1

Software Version : 6.2.1.0.104:0104  
Sample Name : wzy8-30-2  
Instrument Name : HPLC  
Rack/Vial : 0/0  
Sample Amount : 1.000000  
Cycle : 1  
Date : 2005-9-27 16:46:58  
Data Acquisition Time : 2005-9-27 14:47:32  
Channel : A  
Operator : manager  
Dilution Factor : 1.000000

Result File : D:\LC\wzy\Ph-CH(NH-Ph)-CH3\050927-8-30-2.rst  
Sequence File : C:\PenExe\TcWS\Ver6.2.1\Examples\050927-8-30-2.seq

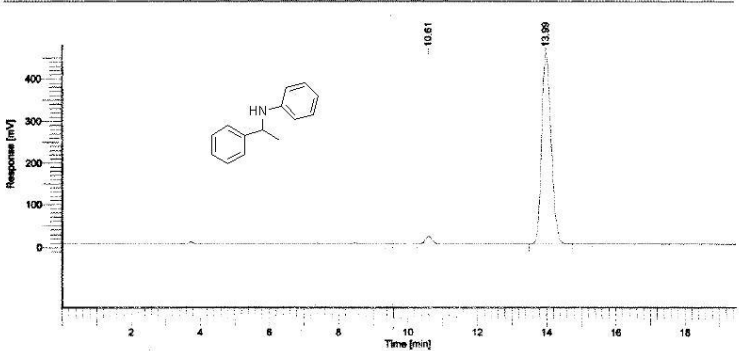

DEFAULT REPORT

| Peak # | Time [min] | Area [uV*sec] | Height [uV] | Area [%] |
|--------|------------|---------------|-------------|----------|
| 1      | 10.607     | 232594.04     | 16760.05    | 2.66     |
| 2      | 13.990     | 8497869.50    | 447349.82   | 97.34    |
|        |            | 8730463.54    | 464109.87   | 100.00   |

Missing Component Report  
Component Expected Retention (Calibration File)  
PE series200 0.001

Time [min]

The HPLC spectra of 2b

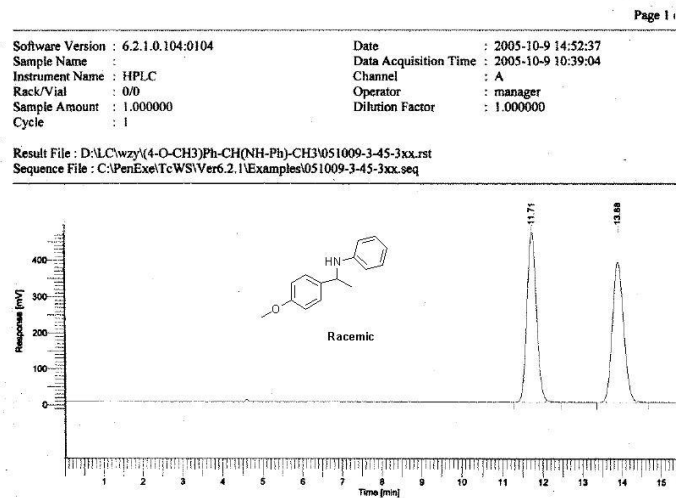

DEFAULT REPORT

| Peak # | Time [min] | Area [uV*sec] | Height [uV] | Area [%] |
|--------|------------|---------------|-------------|----------|
| 1      | 11.706     | 7756574.26    | 468946.10   | 49.91    |
| 2      | 13.880     | 7785965.39    | 386293.01   | 50.09    |
|        |            | 15542539.65   | 855239.11   | 100.00   |

Missing Component Report

| Component   | Expected Retention (Calibration File) |
|-------------|---------------------------------------|
| PE serie200 | 0.001                                 |

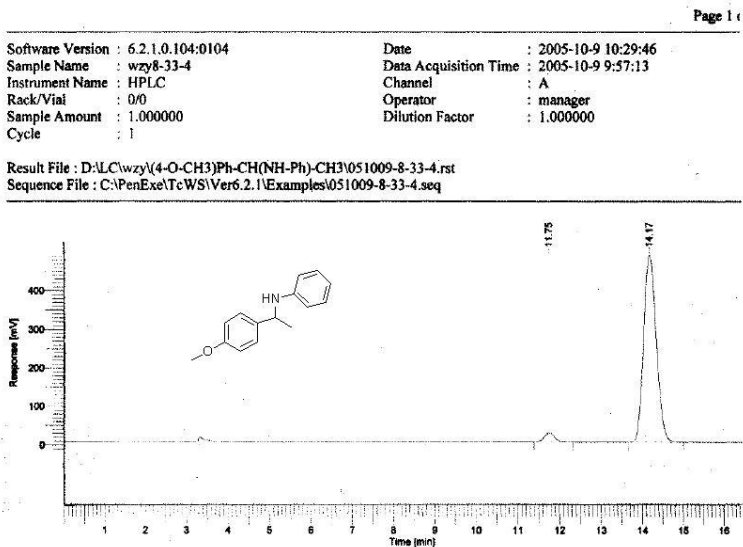

DEFAULT REPORT

| Peak # | Time [min] | Area [uV*sec] | Height [uV] | Area [%] |
|--------|------------|---------------|-------------|----------|
| 1      | 11.750     | 408683.79     | 24005.72    | 3.77     |
| 2      | 14.172     | 10418734.07   | 483893.22   | 96.23    |
|        |            | 10827417.86   | 507898.94   | 100.00   |

Missing Component Report

| Component   | Expected Retention (Calibration File) |
|-------------|---------------------------------------|
| PE serie200 | 0.001                                 |

The HPLC spectra of 2c

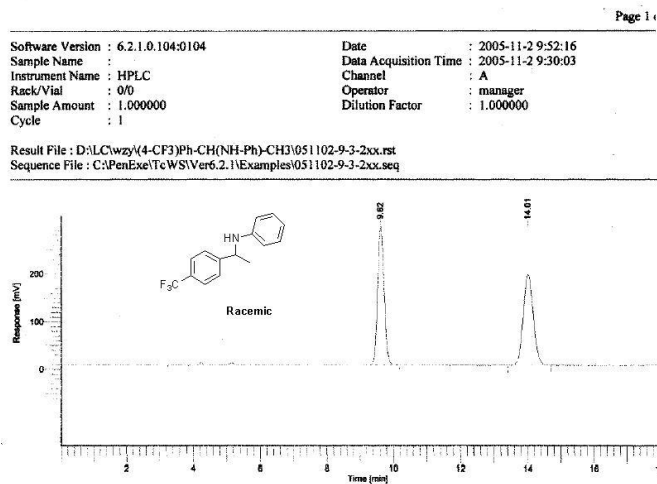

DEFAULT REPORT

| Peak # | Time [min] | Area [uV*sec] | Height [uV] | Area [%] |
|--------|------------|---------------|-------------|----------|
| 1      | 9.623      | 3932457.03    | 289134.89   | 49.77    |
| 2      | 14.010     | 3968977.67    | 190546.55   | 50.23    |
|        |            | 7901434.70    | 479681.44   | 100.00   |

Missing Component Report

| Component    | Expected Retention (Calibration File) |
|--------------|---------------------------------------|
| PE series200 | 0.001                                 |

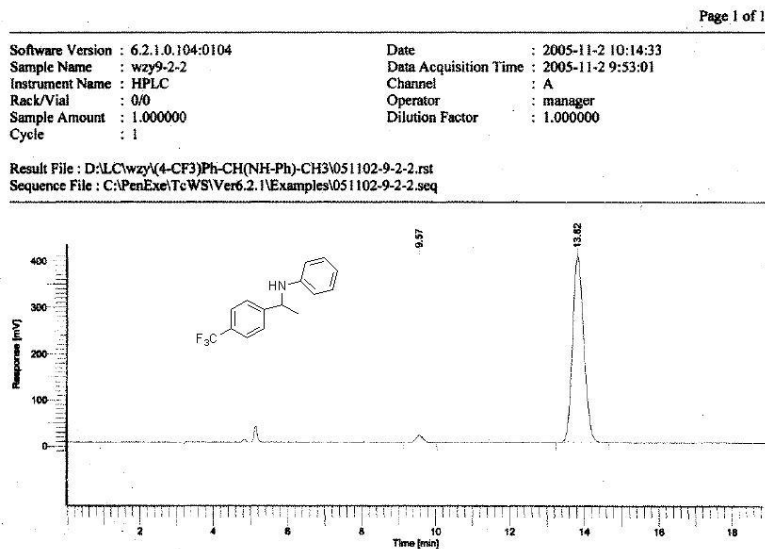

DEFAULT REPORT

| Peak # | Time [min] | Area [uV*sec] | Height [uV] | Area [%] |
|--------|------------|---------------|-------------|----------|
| 1      | 9.566      | 195153.35     | 14758.24    | 2.26     |
| 2      | 13.821     | 8457103.52    | 402504.16   | 97.74    |
|        |            | 8652256.87    | 417262.40   | 100.00   |

Missing Component Report

| Component    | Expected Retention (Calibration File) |
|--------------|---------------------------------------|
| PE series200 | 0.001                                 |

The HPLC spectra of **2d**

Page 1 of 1

Software Version : 6.2.1.0.104:0104 Date : 2005-11-2 13:18:03  
Sample Name : wzy3-45-2xx Data Acquisition Time : 2005-4-26 10:20:25  
Instrument Name : HPLC Channel : A  
Rack/Vial : 0/0 Operator : manager  
Sample Amount : 1.000000 Dilution Factor : 1.000000  
Cycle : 1

Result File : D:\LC\wzy\4-NO2-Ph-CH(NH-Ph)-CH3\050426-3-45-2xx.rst  
Sequence File : C:\PenExe\Tc\WS\Ver6.2.1\Examples\050426-3-45-2xx.seq

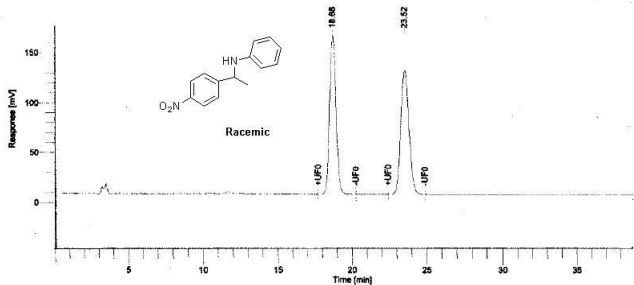

DEFAULT REPORT

| Peak # | Time [min] | Area [uV*sec] | Height [uV] | Area [%] |
|--------|------------|---------------|-------------|----------|
| 1      | 18.678     | 4769863.54    | 159430.89   | 49.99    |
| 2      | 23.517     | 4771634.53    | 124286.46   | 50.01    |
|        |            | 9541498.08    | 283717.35   | 100.00   |

Missing Component Report  
Component Expected Retention (Calibration File)  
PE serie200 0.001

Page 1 of 1

Software Version : 6.2.1.0.104:0104 Date : 2005-10-8 18:16:00  
Sample Name : wzy8-33-3 Data Acquisition Time : 2005-10-8 17:45:22  
Instrument Name : HPLC Channel : A  
Rack/Vial : 0/0 Operator : manager  
Sample Amount : 1.000000 Dilution Factor : 1.000000  
Cycle : 1

Result File : D:\LC\wzy\4-NO2-Ph-CH(NH-Ph)-CH3\051008-8-33-3.rst  
Sequence File : C:\PenExe\Tc\WS\Ver6.2.1\Examples\051008-8-33-3.seq

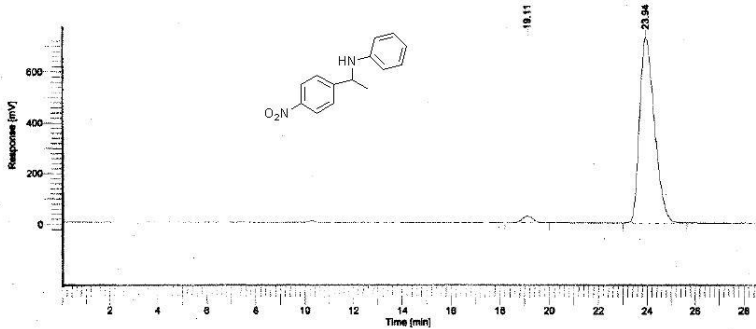

DEFAULT REPORT

| Peak # | Time [min] | Area [uV*sec] | Height [uV] | Area [%] |
|--------|------------|---------------|-------------|----------|
| 1      | 19.111     | 794060.20     | 26465.76    | 2.49     |
| 2      | 23.937     | 31069389.27   | 727734.39   | 97.51    |
|        |            | 31863449.47   | 754200.14   | 100.00   |

Missing Component Report  
Component Expected Retention (Calibration File)  
PE serie200 0.001

The HPLC spectra of 2e

Page 1 of 1

|                                     |                                            |
|-------------------------------------|--------------------------------------------|
| Software Version : 6.2.1.0.104:0104 | Date : 2005-6-16 14:31:04                  |
| Sample Name : wzy-6-2-3             | Data Acquisition Time : 2005-6-16 12:39:34 |
| Instrument Name : HPLC              | Channel : A                                |
| Rack/Vial : 0/0                     | Operator : manager                         |
| Sample Amount : 1.000000            | Dilution Factor : 1.000000                 |
| Cycle : 1                           |                                            |

Result File : D:\LC\wzy\4-Br\Ph-CH(NH-Ph)-CH3\050616.rst  
Sequence File : C:\PenExe\TcWS\Ver6.2.1\Examples\050616.seq

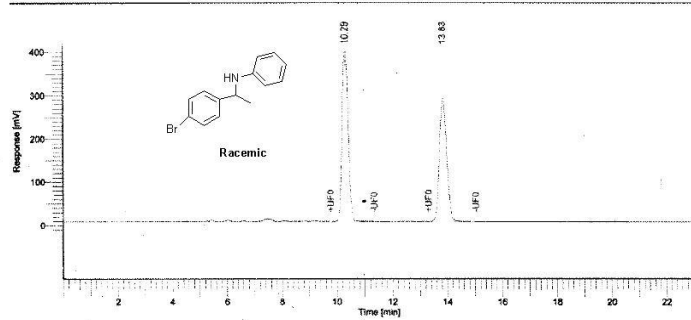

DEFAULT REPORT

| Peak # | Time [min] | Area [uV*sec] | Height [uV] | Area [%] |
|--------|------------|---------------|-------------|----------|
| 1      | 10.290     | 5237467.04    | 391211.67   | 49.80    |
| 2      | 13.833     | 5278505.35    | 284364.33   | 50.20    |
|        |            | 10515972.39   | 675576.00   | 100.00   |

Missing Component Report

| Component    | Expected Retention (Calibration File) |
|--------------|---------------------------------------|
| PE serise200 | 0.001                                 |

Page 1 of 1

|                                     |                                            |
|-------------------------------------|--------------------------------------------|
| Software Version : 6.2.1.0.104:0104 | Date : 2005-10-8 16:40:08                  |
| Sample Name : wzy8-33-2             | Data Acquisition Time : 2005-10-8 16:18:42 |
| Instrument Name : HPLC              | Channel : A                                |
| Rack/Vial : 0/0                     | Operator : manager                         |
| Sample Amount : 1.000000            | Dilution Factor : 1.000000                 |
| Cycle : 1                           |                                            |

Result File : D:\LC\wzy\4-Br\Ph-CH(NH-Ph)-CH3\051008-8-33-2.rst  
Sequence File : C:\PenExe\TcWS\Ver6.2.1\Examples\051008-8-33-2.seq

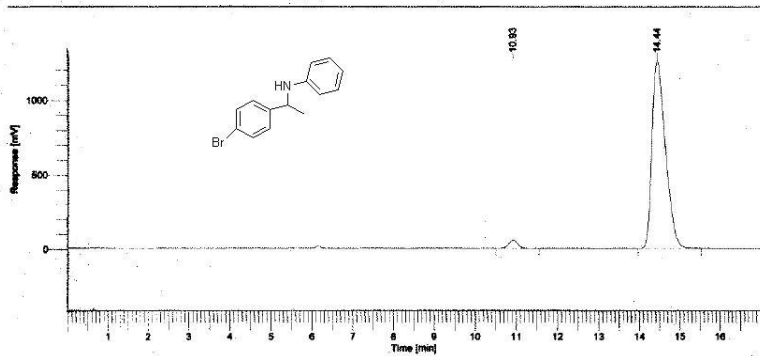

DEFAULT REPORT

| Peak # | Time [min] | Area [uV*sec] | Height [uV] | Area [%] |
|--------|------------|---------------|-------------|----------|
| 1      | 10.927     | 771188.40     | 53336.11    | 2.58     |
| 2      | 14.444     | 29073831.85   | 1.26e+06    | 97.42    |
|        |            | 29845020.26   | 1.31e+06    | 100.00   |

Missing Component Report

| Component    | Expected Retention (Calibration File) |
|--------------|---------------------------------------|
| PE serise200 | 0.001                                 |

The HPLC spectra of 2f

Page 1 of 1

Software Version : 6.2.1.0.1040104  
Sample Name : WZY-8-48  
Instrument Name : HPLC  
Rack/Vial : 0/0  
Sample Amount : 1.000000  
Cycle : 1  
Date : 2005-10-28 15:25:12  
Data Acquisition Time : 2005-10-28 14:55:40  
Channel : A  
Operator : manager  
Dilution Factor : 1.000000

Result File : D:\LC\wzy\3-Br)Ph-CH(NH-Ph)-CH3\051028-xx.rst  
Sequence File : C:\PenExe\TcWS\Ver6.2.1\Examples\051028-xx.seq

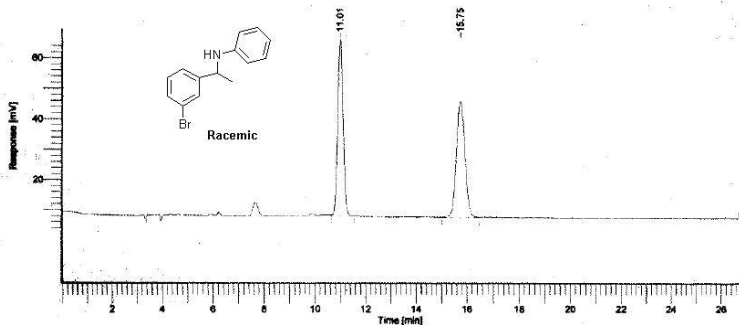

DEFAULT REPORT

| Peak #                     | Time [min] | Area [uV*sec] | Height [uV] | Area [%] |
|----------------------------|------------|---------------|-------------|----------|
| 1                          | 11.012     | 873593.42     | 57944.23    | 49.67    |
| 2                          | 15.754     | 885359.87     | 38194.30    | 50.33    |
| 1758953.29 96138.52 100.00 |            |               |             |          |

Missing Component Report  
Component Expected Retention (Calibration File)

PE series200 0.001

Time (min)

Page 1 of 1

Software Version : 6.2.1.0.1040104  
Sample Name : wzy9-1-3  
Instrument Name : HPLC  
Rack/Vial : 0/0  
Sample Amount : 1.000000  
Cycle : 1  
Date : 2005-10-28 15:52:31  
Data Acquisition Time : 2005-10-28 15:27:16  
Channel : A  
Operator : manager  
Dilution Factor : 1.000000

Result File : D:\LC\wzy\3-Br)Ph-CH(NH-Ph)-CH3\051028-9-1-3.rst  
Sequence File : C:\PenExe\TcWS\Ver6.2.1\Examples\051028-9-1-3.seq

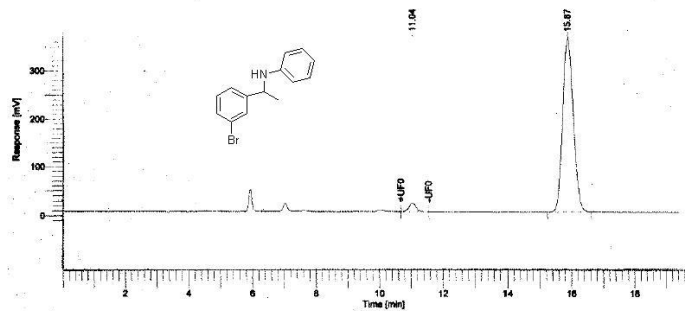

DEFAULT REPORT

| Peak #                      | Time [min] | Area [uV*sec] | Height [uV] | Area [%] |
|-----------------------------|------------|---------------|-------------|----------|
| 1                           | 11.038     | 254393.97     | 16886.63    | 2.96     |
| 2                           | 15.866     | 8338628.40    | 357634.54   | 97.04    |
| 8593022.37 374521.17 100.00 |            |               |             |          |

Missing Component Report  
Component Expected Retention (Calibration File)

PE series200 0.001

Time (min)

The HPLC spectra of 2g

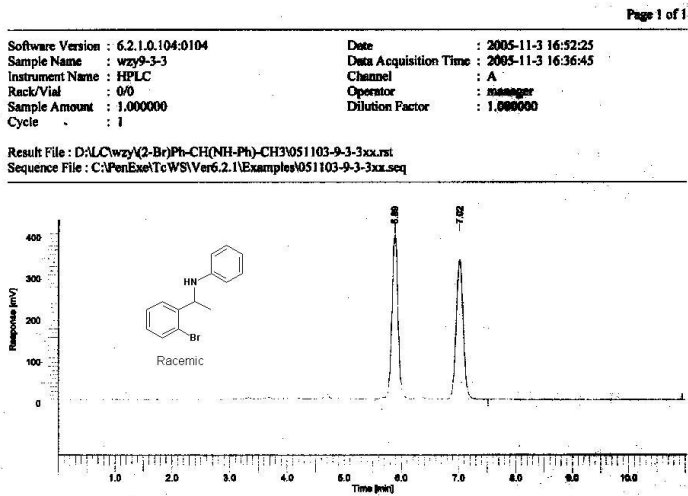

DEFAULT REPORT

| Peak # | Time [min] | Area [uV*sec] | Height [uV] | Area [%] |
|--------|------------|---------------|-------------|----------|
| 1      | 5.889      | 2957436.44    | 405404.61   | 50.36    |
| 2      | 7.021      | 2914912.29    | 335873.41   | 49.64    |
|        |            | 5872348.73    | 741278.02   | 100.00   |

Missing Component Report

| Component    | Expected Retention (Calibration File) |
|--------------|---------------------------------------|
| PE series200 | 0.001                                 |

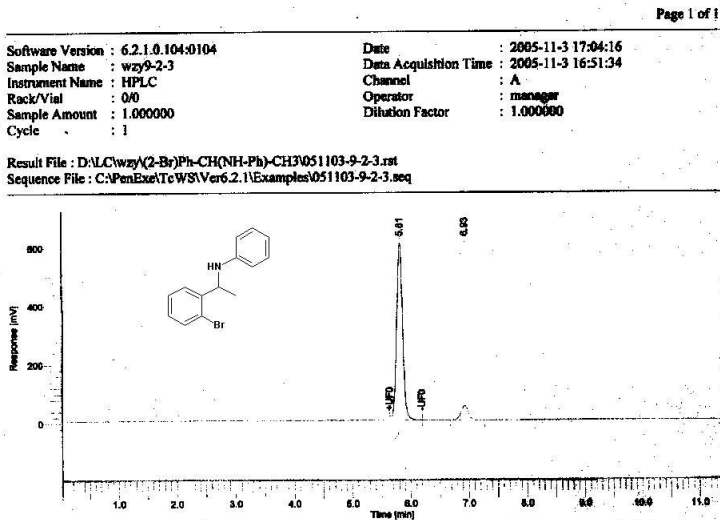

DEFAULT REPORT

| Peak # | Time [min] | Area [uV*sec] | Height [uV] | Area [%] |
|--------|------------|---------------|-------------|----------|
| 1      | 5.812      | 4302864.20    | 601472.00   | 91.28    |
| 2      | 6.925      | 411054.04     | 48356.90    | 8.72     |
|        |            | 4713918.25    | 649828.90   | 100.00   |

Missing Component Report

| Component    | Expected Retention (Calibration File) |
|--------------|---------------------------------------|
| PE series200 | 0.001                                 |

## The HPLC spectra of 2h

Page 1 of 1

Software Version : 6.2.1.0.104:0104 Date : 2005-11-9 17:08:15  
Sample Name : Data Acquisition Time : 2005-11-9 16:48:25  
Instrument Name : HPLC Channel : A  
Rack/Vial : 0/0 Operator : manager  
Sample Amount : 1.000000 Dilution Factor : 1.000000  
Cycle : 1

Result File : D:\LC\wzy\2-Cl)Ph-CH(NH-Ph)-CH3\051109-9-12-3xx-od1.rst  
Sequence File : C:\PenExe\TcWS\Ver6.2.1\Examples\051109-9-12-3xx-od1.seq

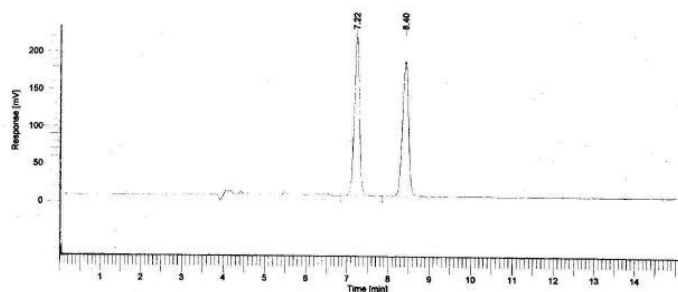

### DEFAULT REPORT

| Peak # | Time [min] | Area [uV*sec] | Height [uV] | Area [%] |
|--------|------------|---------------|-------------|----------|
| 1      | 7.218      | 1876611.71    | 212885.80   | 50.29    |
| 2      | 8.405      | 1854656.65    | 180372.83   | 49.71    |
|        |            | 3731268.36    | 393258.62   | 100.00   |

Missing Component Report

| Component    | Expected Retention (Calibration File) |
|--------------|---------------------------------------|
| PE series200 | 0.001                                 |

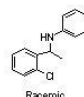

Page 1 of 1

Software Version : 6.2.1.0.104:0104 Date : 2005-11-9 17:22:52  
Sample Name : wzy9-11-3 Data Acquisition Time : 2005-11-9 17:07:35  
Instrument Name : HPLC Channel : A  
Rack/Vial : 0/0 Operator : manager  
Sample Amount : 1.000000 Dilution Factor : 1.000000  
Cycle : 1

Result File : D:\LC\wzy\2-Cl)Ph-CH(NH-Ph)-CH3\051109-9-11-3.rst  
Sequence File : C:\PenExe\TcWS\Ver6.2.1\Examples\051109-9-11-3.seq

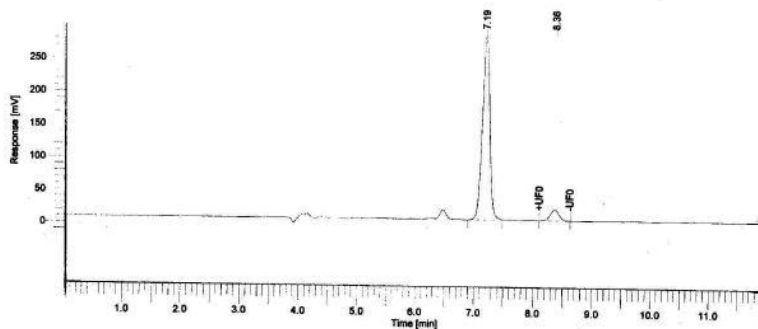

### DEFAULT REPORT

| Peak # | Time [min] | Area [uV*sec] | Height [uV] | Area [%] |
|--------|------------|---------------|-------------|----------|
| 1      | 7.186      | 2415700.80    | 277729.17   | 93.47    |
| 2      | 8.363      | 168681.76     | 16706.89    | 6.53     |
|        |            | 2584382.56    | 294436.06   | 100.00   |

Missing Component Report

| Component    | Expected Retention (Calibration File) |
|--------------|---------------------------------------|
| PE series200 | 0.001                                 |

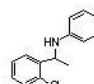

The HPLC spectra of **2i**

Page 1 c

|                  |                    |                       |                      |
|------------------|--------------------|-----------------------|----------------------|
| Software Version | : 6.2.1.0.104:0104 | Date                  | : 2005-10-9 14:49:39 |
| Sample Name      | :                  | Data Acquisition Time | : 2005-10-9 11:47:33 |
| Instrument Name  | : HPLC             | Channel               | : A                  |
| Rack/Vial        | : 0/0              | Operator              | : manager            |
| Sample Amount    | : 1.000000         | Dilution Factor       | : 1.000000           |
| Cycle            | : 1                |                       |                      |

Result File : D:\LC\wzy\NaP-CH(NH-Ph)-CH3\051009-3-45-4xx.rst  
Sequence File : C:\PenExe\Tc\WS\Ver6.2.1\Examples\051009-3-45-4xx.seq

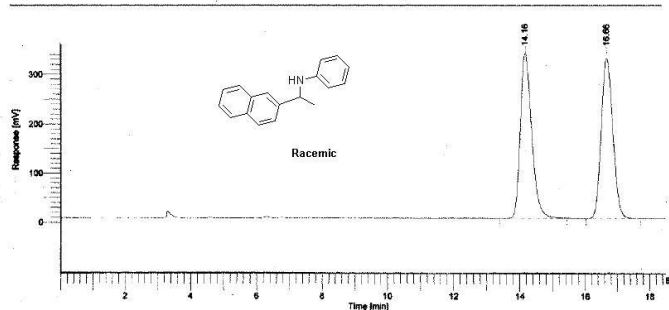

DEFAULT REPORT

| Peak # | Time [min] | Area [uV*sec] | Height [uV] | Area [%] |
|--------|------------|---------------|-------------|----------|
| 1      | 14.162     | 8026022.88    | 334356.45   | 49.64    |
| 2      | 16.659     | 8140874.05    | 323943.46   | 50.36    |
|        |            | 16166896.93   | 658299.91   | 100.00   |

Missing Component Report

| Component   | Expected Retention (Calibration File) |
|-------------|---------------------------------------|
| PE serie200 | 0.001                                 |

Page 1

|                  |                    |                       |                      |
|------------------|--------------------|-----------------------|----------------------|
| Software Version | : 6.2.1.0.104:0104 | Date                  | : 2005-10-9 11:21:51 |
| Sample Name      | : wzy8-33-5        | Data Acquisition Time | : 2005-10-9 10:58:39 |
| Instrument Name  | : HPLC             | Channel               | : A                  |
| Rack/Vial        | : 0/0              | Operator              | : manager            |
| Sample Amount    | : 1.000000         | Dilution Factor       | : 1.000000           |
| Cycle            | : 1                |                       |                      |

Result File : D:\LC\wzy\NaP-CH(NH-Ph)-CH3\051009-8-33-5.rst  
Sequence File : C:\PenExe\Tc\WS\Ver6.2.1\Examples\051009-8-33-5.seq

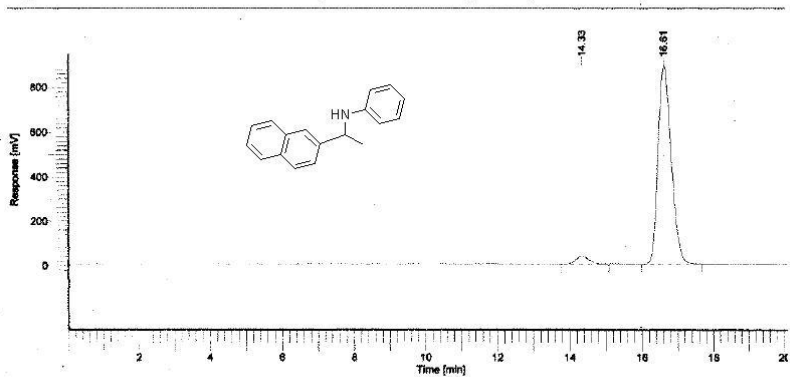

DEFAULT REPORT

| Peak # | Time [min] | Area [uV*sec] | Height [uV] | Area [%] |
|--------|------------|---------------|-------------|----------|
| 1      | 14.332     | 850043.77     | 35377.96    | 3.61     |
| 2      | 16.606     | 22690801.86   | 889845.58   | 96.39    |
|        |            | 23540845.63   | 925223.54   | 100.00   |

Missing Component Report

| Component   | Expected Retention (Calibration File) |
|-------------|---------------------------------------|
| PE serie200 | 0.001                                 |

The HPLC spectra of 2j

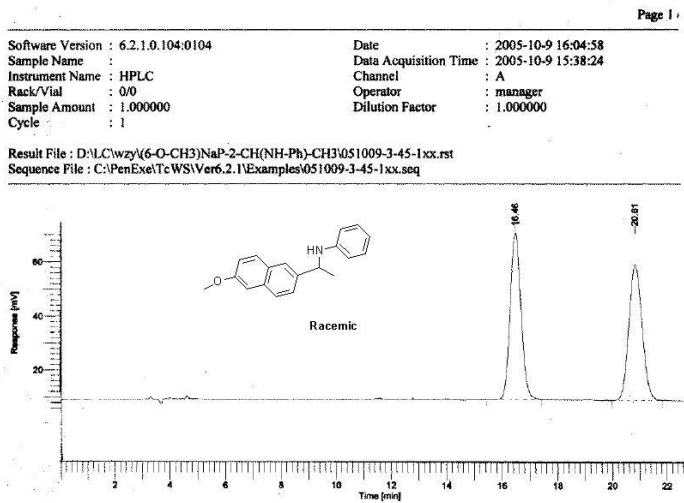

DEFAULT REPORT

| Peak # | Time [min] | Area [uV*sec] | Height [uV] | Area [%] |
|--------|------------|---------------|-------------|----------|
| 1      | 16.461     | 1659845.52    | 61167.70    | 49.57    |
| 2      | 20.811     | 1688588.54    | 49848.62    | 50.43    |
|        |            |               |             |          |
|        | 3348434.05 | 111016.32     | 100.00      |          |

Missing Component Report

| Component    | Expected Retention (Calibration File) |
|--------------|---------------------------------------|
| PE series200 | 0.001                                 |

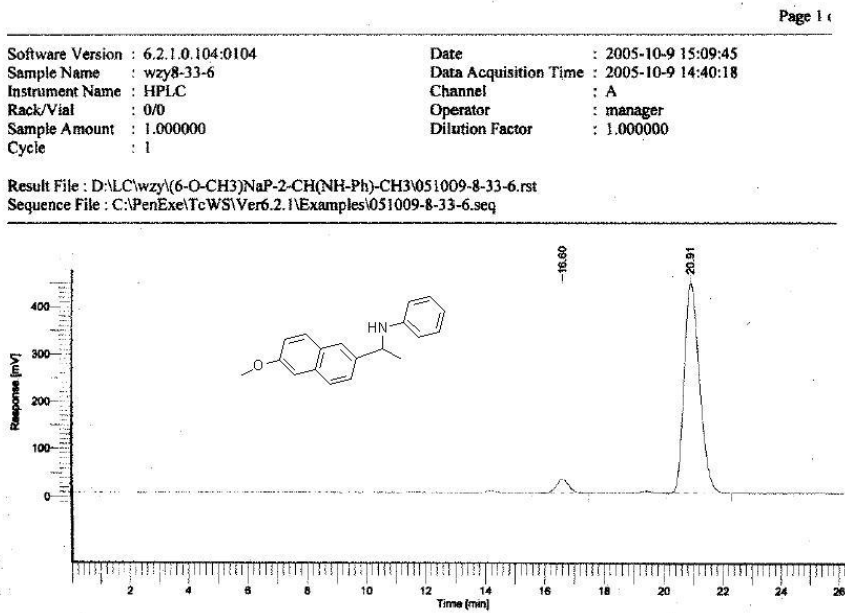

DEFAULT REPORT

| Peak # | Time [min]  | Area [uV*sec] | Height [uV] | Area [%] |
|--------|-------------|---------------|-------------|----------|
| 1      | 16.598      | 807143.68     | 28677.38    | 4.83     |
| 2      | 20.908      | 15900559.83   | 441646.12   | 95.17    |
|        |             |               |             |          |
|        | 16707703.51 | 470323.50     | 100.00      |          |

Missing Component Report

| Component    | Expected Retention (Calibration File) |
|--------------|---------------------------------------|
| PE series200 | 0.001                                 |

The HPLC spectra of 2k

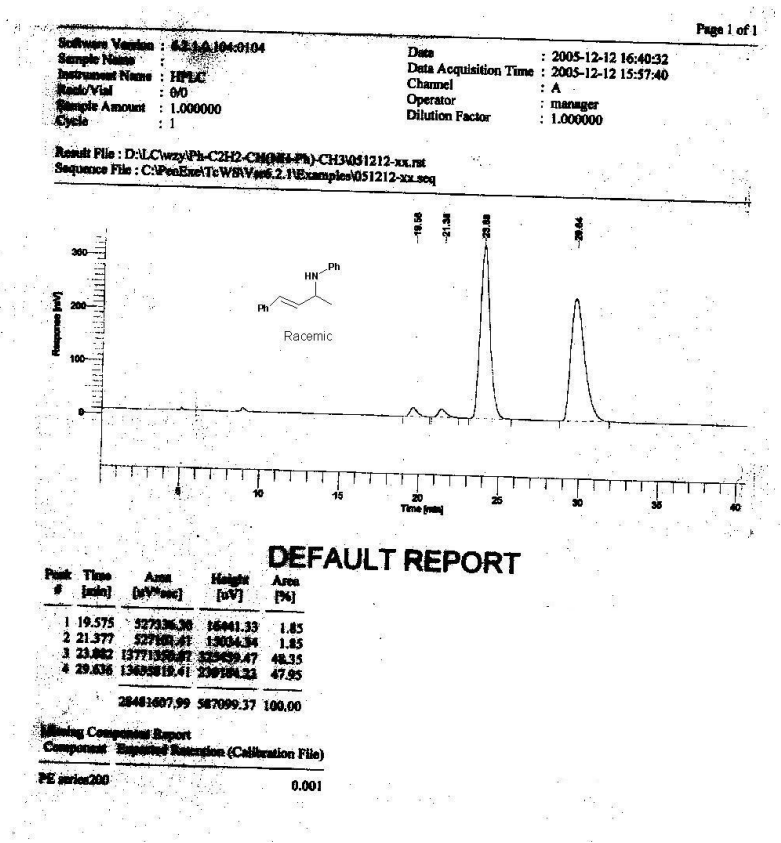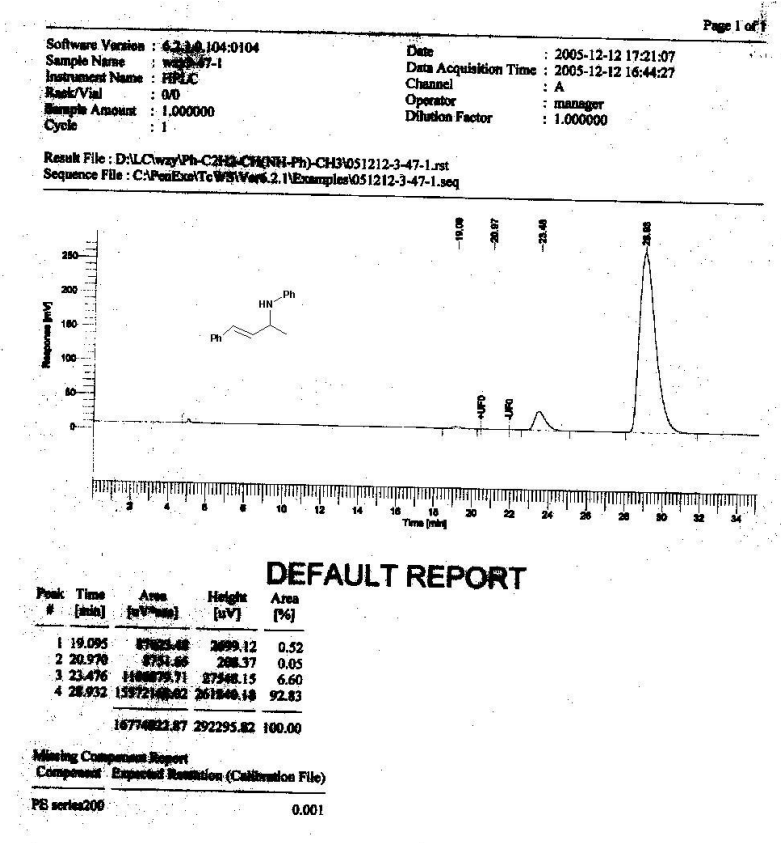

The HPLC spectra of 2l

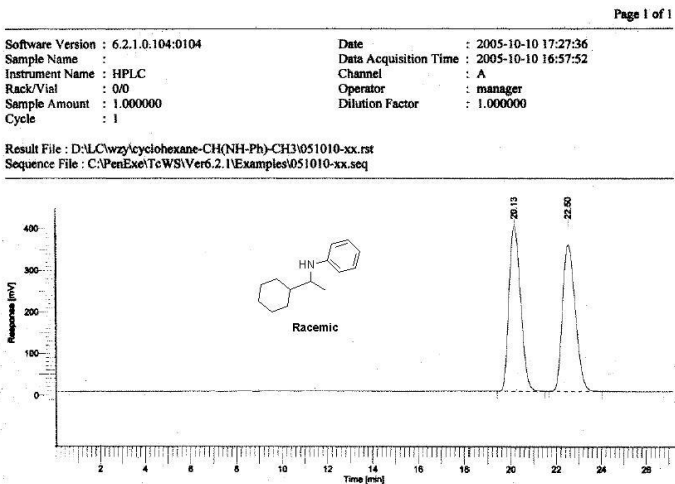

DEFAULT REPORT

| Peak # | Time [min] | Area [uV*sec] | Height [uV] | Area [%] |
|--------|------------|---------------|-------------|----------|
| 1      | 20.130     | 14001572.89   | 395806.49   | 49.99    |
| 2      | 22.504     | 14004558.03   | 352171.61   | 50.01    |
|        |            | 28006130.92   | 747978.10   | 100.00   |

Missing Component Report

| Component    | Expected Retention (Calibration File) |
|--------------|---------------------------------------|
| PE series200 | 0.001                                 |

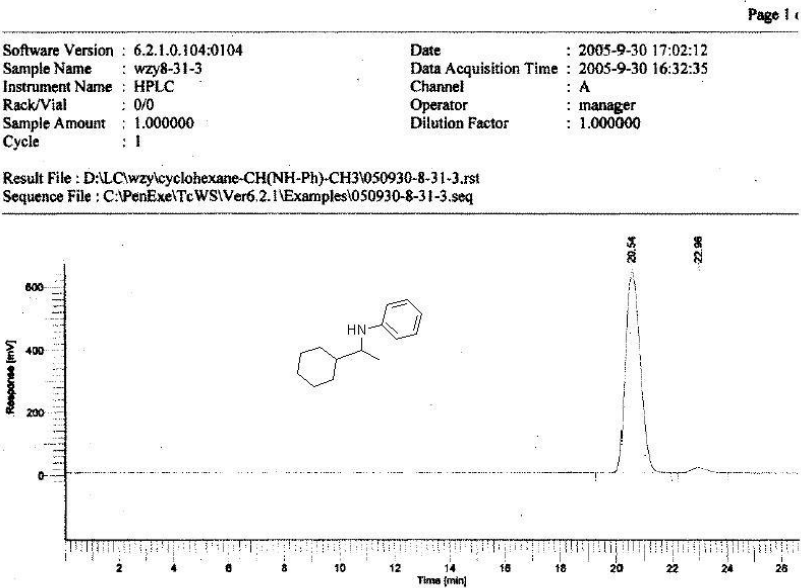

DEFAULT REPORT

| Peak # | Time [min] | Area [uV*sec] | Height [uV] | Area [%] |
|--------|------------|---------------|-------------|----------|
| 1      | 20.543     | 23137989.07   | 639204.51   | 97.32    |
| 2      | 22.959     | 636412.24     | 15824.46    | 2.68     |
|        |            | 23774401.31   | 655028.97   | 100.00   |

Missing Component Report

| Component    | Expected Retention (Calibration File) |
|--------------|---------------------------------------|
| PE series200 | 0.001                                 |

The HPLC spectra of **2m**

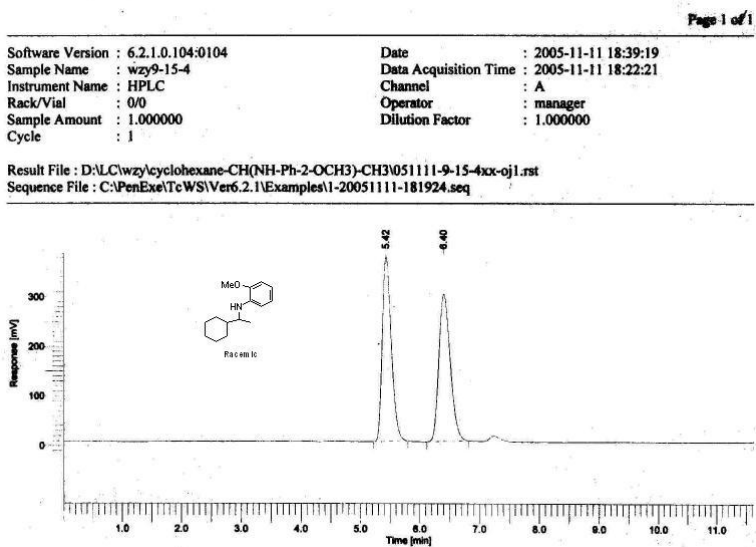

DEFAULT REPORT

| Peak # | Time [min] | Area [uV*sec] | Height [uV] | Area [%] |
|--------|------------|---------------|-------------|----------|
| 1      | 5.425      | 3937797.74    | 371833.21   | 49.94    |
| 2      | 6.398      | 3947154.07    | 296267.93   | 50.06    |
|        | 7884951.81 | 668101.15     | 100.00      |          |

Missing Component Report  
Component Expected Retention (Calibration File)  
PE series200 0.001

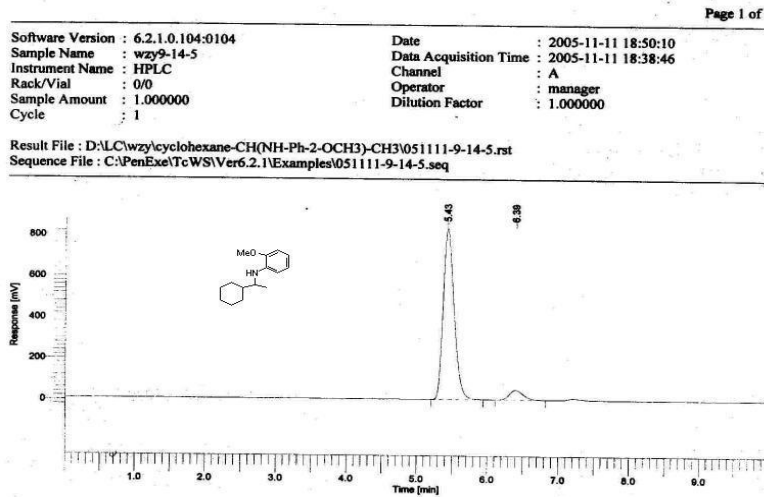

DEFAULT REPORT

| Peak # | Time [min] | Area [uV*sec] | Height [uV] | Area [%] |
|--------|------------|---------------|-------------|----------|
| 1      | 5.426      | 8907863.69    | 827812.27   | 93.34    |
| 2      | 6.395      | 635308.27     | 47330.84    | 6.66     |
|        | 9543171.96 | 875143.11     | 100.00      |          |

Missing Component Report  
Component Expected Retention (Calibration File)  
PE series200 0.001

## The HPLC spectra of 2n

Page 1 of 1

Software Version : 6.2.1.0.104:0104  
Sample Name :  
Instrument Name : HPLC  
Rack/Vial : 0/0  
Sample Amount : 1.000000  
Cycle : 1

Date : 2005-11-9 10:49:58  
Data Acquisition Time : 2005-11-9 10:37:01  
Channel : A  
Operator : manager  
Dilution Factor : 1.000000

Result File : D:\LC\wzy\cyclohexane-CH(NH-Ph-4-Br)-CH3\051109-9-12-1xx.rst  
Sequence File : C:\PenExe\Tc\WS\Ver6.2.1\Examples\051109-9-12-1xx.seq

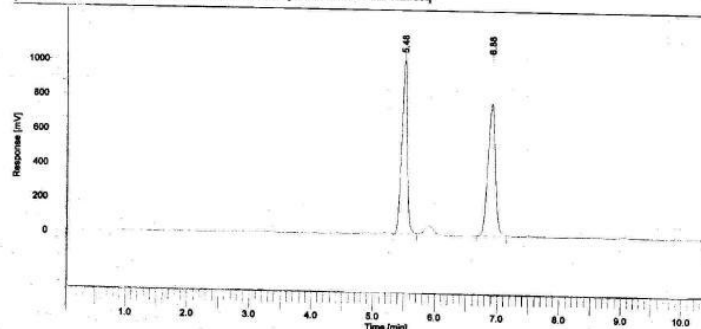

### DEFAULT REPORT

| Peak # | Time [min] | Area [uV*sec] | Height [uV] | Area [%] |
|--------|------------|---------------|-------------|----------|
| 1      | 5.476      | 6290460.23    | 1.01e+06    | 49.71    |
| 2      | 6.881      | 6363478.18    | 768532.87   | 50.29    |
|        |            | 12653938.41   | 1.78e+06    | 100.00   |

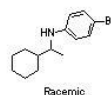

Missing Component Report

| Component    | Expected Retention (Calibration File) |
|--------------|---------------------------------------|
| PE series200 | 0.001                                 |

Page 1 of 1

Software Version : 6.2.1.0.104:0104  
Sample Name : wzy9-11-1  
Instrument Name : HPLC  
Rack/Vial : 0/0  
Sample Amount : 1.000000  
Cycle : 1

Date : 2005-11-9 11:01:54  
Data Acquisition Time : 2005-11-9 10:50:56  
Channel : A  
Operator : manager  
Dilution Factor : 1.000000

Result File : D:\LC\wzy\cyclohexane-CH(NH-Ph-4-Br)-CH3\051109-9-11-1.rst  
Sequence File : C:\PenExe\Tc\WS\Ver6.2.1\Examples\051109-9-11-1.seq

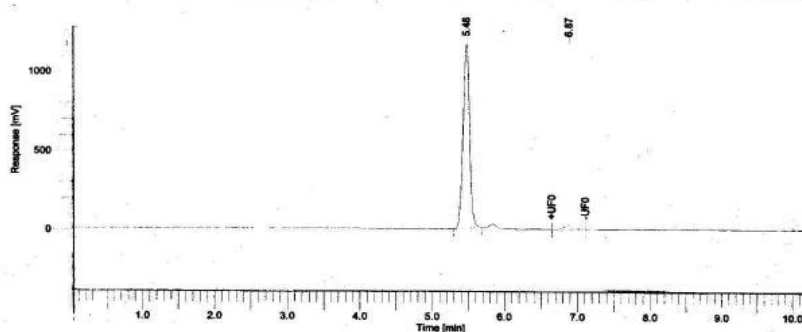

### DEFAULT REPORT

| Peak # | Time [min] | Area [uV*sec] | Height [uV] | Area [%] |
|--------|------------|---------------|-------------|----------|
| 1      | 5.459      | 7321936.68    | 1.17e+06    | 97.31    |
| 2      | 6.867      | 202476.30     | 24619.37    | 2.69     |
|        |            | 7524412.98    | 1.19e+06    | 100.00   |

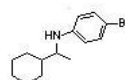

Missing Component Report

| Component    | Expected Retention (Calibration File) |
|--------------|---------------------------------------|
| PE series200 | 0.001                                 |

The HPLC spectra of 2o

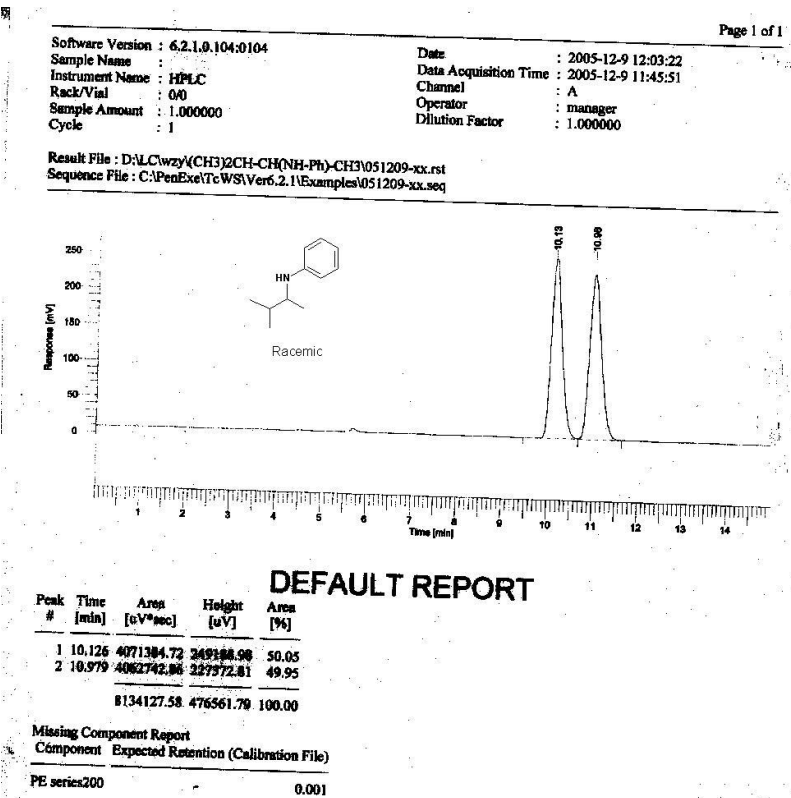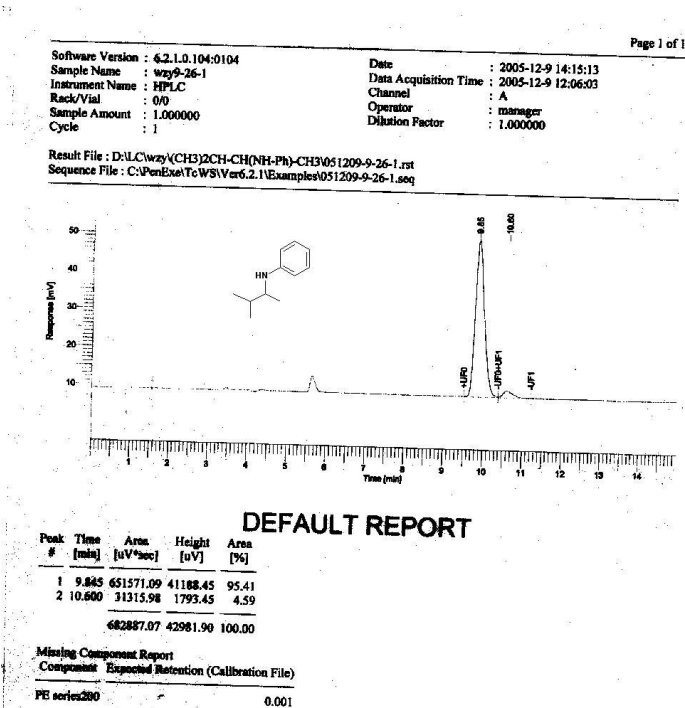

The HPLC spectra of 2p

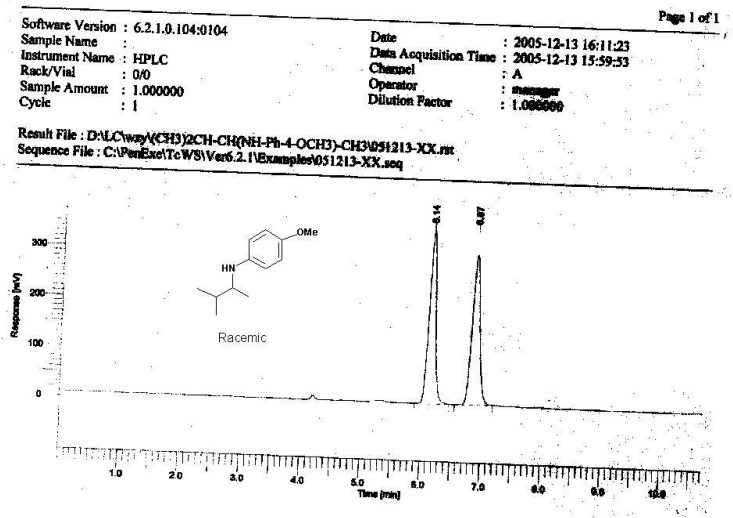

DEFAULT REPORT

| Peak #                      | Time [min] | Area [uV*sec] | Height [uV] | Area [%] |
|-----------------------------|------------|---------------|-------------|----------|
| 1                           | 6.142      | 2656384.40    | 344477.80   | 50.07    |
| 2                           | 6.870      | 2648834.80    | 297252.66   | 49.93    |
| 5305219.21 641730.46 100.00 |            |               |             |          |

Missing Component Report

| Component    | Expected Retention (Calibration File) |
|--------------|---------------------------------------|
| PE series200 | 0.001                                 |

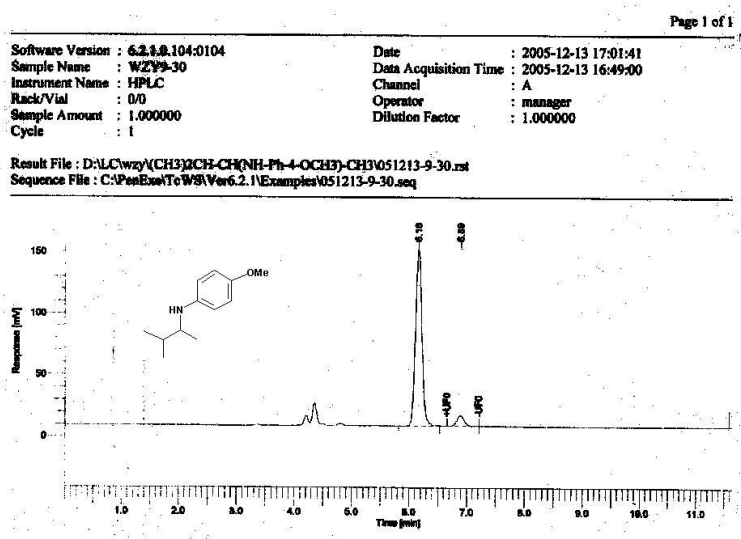

DEFAULT REPORT

| Peak #                      | Time [min] | Area [uV*sec] | Height [uV] | Area [%] |
|-----------------------------|------------|---------------|-------------|----------|
| 1                           | 6.159      | 1115931.43    | 143648.14   | 93.61    |
| 2                           | 6.892      | 76984.19      | 2569.25     | 6.39     |
| 1191115.62 152217.38 100.00 |            |               |             |          |

Missing Component Report

| Component    | Expected Retention (Calibration File) |
|--------------|---------------------------------------|
| PE series200 | 0.001                                 |

The HPLC spectra of 2q

Page 1 a

Software Version : 6.2.1.0.104:0104 Date : 2005-11-2 13:18:45  
Sample Name : HPLC Data Acquisition Time : 2005-7-4 17:10:59  
Instrument Name : HPLC Channel : A  
Rack/Vial : 0/0 Operator : manager  
Sample Amount : 1.000000 Dilution Factor : 1.000000  
Cycle : 1

Result File : D:\LC\wzy\Ph-CH(NH-Ph-4-OMe)-CH3\050704-xx.rst  
Sequence File : C:\PenExe\Tc\WS\Ver6.2.1\Examples\050704-xx-20050704-165620.seq

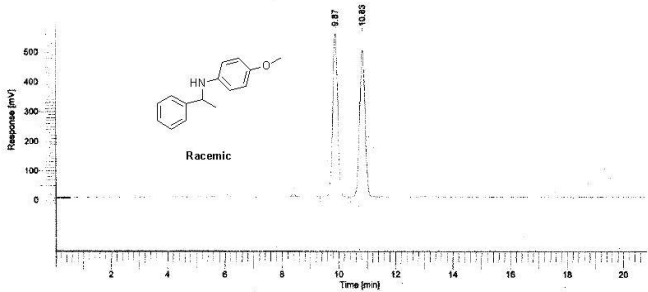

DEFAULT REPORT

| Peak #                      | Time [min] | Area [uV*sec] | Height [uV] | Area [%] |
|-----------------------------|------------|---------------|-------------|----------|
| 1                           | 9.875      | 6656863.03    | 552813.80   | 50.12    |
| 2                           | 10.831     | 6624389.39    | 496336.67   | 49.88    |
| 13281252.42 1.05e+06 100.00 |            |               |             |          |

Missing Component Report

| Component    | Expected Retention (Calibration File) |
|--------------|---------------------------------------|
| PE series200 | 0.001                                 |

Page 1 c

Software Version : 6.2.1.0.104:0104 Date : 2005-11-2 13:19:02  
Sample Name : wzy8-31-5 Data Acquisition Time : 2005-9-30 10:33:57  
Instrument Name : HPLC Channel : A  
Rack/Vial : 0/0 Operator : manager  
Sample Amount : 1.000000 Dilution Factor : 1.900000  
Cycle : 1

Result File : D:\LC\wzy\Ph-CH(NH-Ph-4-OMe)-CH3\050930-8-31-5.rst  
Sequence File : C:\PenExe\Tc\WS\Ver6.2.1\Examples\050930-8-31-5.seq

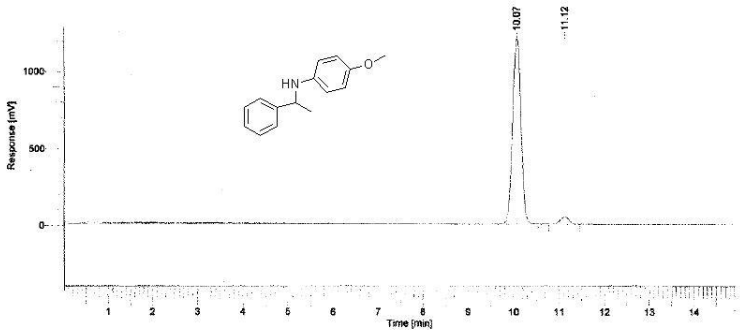

DEFAULT REPORT

| Peak #                      | Time [min] | Area [uV*sec] | Height [uV] | Area [%] |
|-----------------------------|------------|---------------|-------------|----------|
| 1                           | 10.070     | 15269280.91   | 1.20e+06    | 95.84    |
| 2                           | 11.124     | 662967.81     | 48040.22    | 4.16     |
| 15932248.72 1.25e+06 100.00 |            |               |             |          |

Missing Component Report

| Component    | Expected Retention (Calibration File) |
|--------------|---------------------------------------|
| PE series200 | 0.001                                 |

The HPLC spectra of 2r

Page 1

Software Version : 6.2.1.0.104:0104  
Sample Name : wzy9-6-1  
Instrument Name : HPLC  
Rack/Vial : 0/0  
Sample Amount : 1.000000  
Cycle : 1  
Date : 2005-11-2 13:46:25  
Data Acquisition Time : 2005-11-2 13:29:59  
Channel : A  
Operator : manager  
Dilution Factor : 1.000000

Result File : D:\LC\wzy\Ph-CH(NH-Ph-2-OMe)-CH3\051102-9-6-1xxx.rst  
Sequence File : C:\PenExe\Tc\WS\Ver6.2.1\Examples\051102-9-6-1.seq

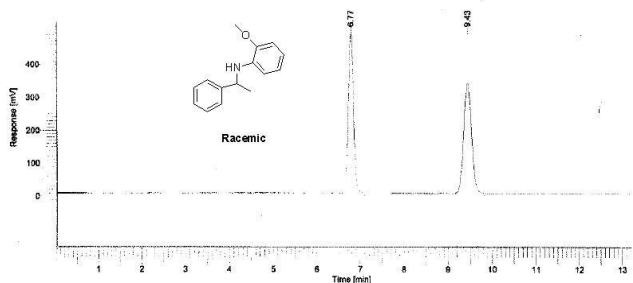

DEFAULT REPORT

| Peak #                      | Time [min] | Area [uV*sec] | Height [uV] | Area [%] |
|-----------------------------|------------|---------------|-------------|----------|
| 1                           | 6.775      | 4092085.97    | 483213.90   | 49.83    |
| 2                           | 9.432      | 4120024.68    | 334151.47   | 50.17    |
| 8212110.65 817365.37 100.00 |            |               |             |          |

Missing Component Report  
Component Expected Retention (Calibration File)  
PE series200 0.001

Page 1

Software Version : 6.2.1.0.104:0104  
Sample Name : wzy9-7-2  
Instrument Name : HPLC  
Rack/Vial : 0/0  
Sample Amount : 1.000000  
Cycle : 1  
Date : 2005-11-2 14:00:02  
Data Acquisition Time : 2005-11-2 13:47:16  
Channel : A  
Operator : manager  
Dilution Factor : 1.000000

Result File : D:\LC\wzy\Ph-CH(NH-Ph-2-OMe)-CH3\051102-9-7-2.rst  
Sequence File : C:\PenExe\Tc\WS\Ver6.2.1\Examples\051102-9-7-2.seq

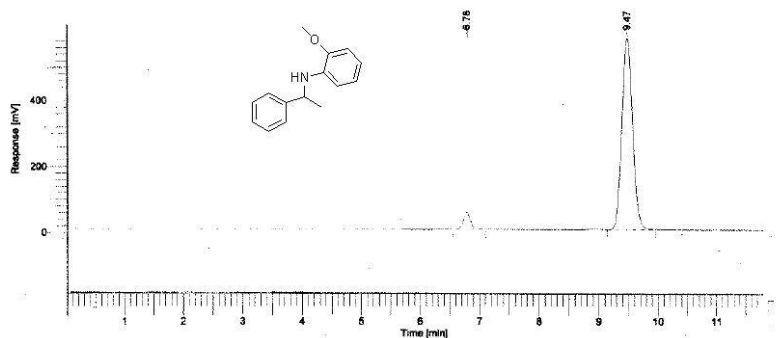

DEFAULT REPORT

| Peak #                      | Time [min] | Area [uV*sec] | Height [uV] | Area [%] |
|-----------------------------|------------|---------------|-------------|----------|
| 1                           | 6.783      | 434144.33     | 51109.89    | 5.61     |
| 2                           | 9.470      | 7302231.03    | 578586.43   | 94.39    |
| 7736375.37 629696.31 100.00 |            |               |             |          |

Missing Component Report  
Component Expected Retention (Calibration File)  
PE series200 0.001

The HPLC spectra of 2s

Page 1

Software Version : 6.2.1.0.104:0104 Date : 2005-10-12 11:32:42  
Sample Name : HPLC Data Acquisition Time : 2005-10-12 11:18:00  
Instrument Name : HPLC Channel : A  
Rack/Vial : 0/0 Operator : manager  
Sample Amount : 1.000000 Dilution Factor : 1.000000  
Cycle : 1

Result File : D:\LC\wzy\Ph-CH(NH-PH-4-CH3)-CH3\051012-7-11-2xx.rst  
Sequence File : C:\PenExe\Tc\WS\Ver6.2.1\Examples\051012-7-11-2xx.seq

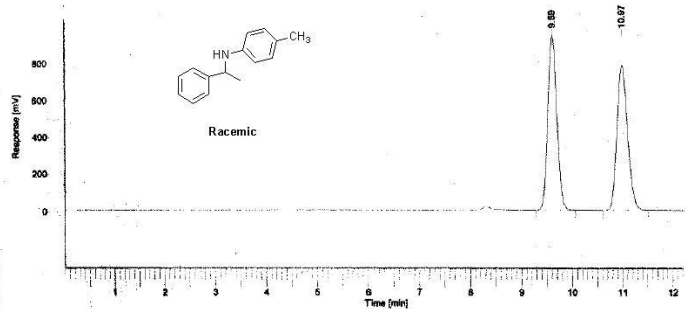

DEFAULT REPORT

| Peak # | Time [min] | Area [uV*sec] | Height [uV] | Area [%] |
|--------|------------|---------------|-------------|----------|
| 1      | 9.589      | 11588600.20   | 944838.66   | 49.98    |
| 2      | 10.971     | 11597798.71   | 785236.95   | 50.02    |
|        |            | 23186398.91   | 1.73e+06    | 100.00   |

Missing Component Report  
Component Expected Retention (Calibration File)  
PE series200 0.001

Page 1

Software Version : 6.2.1.0.104:0104 Date : 2005-10-12 11:19:45  
Sample Name : wzy8-41-2 Data Acquisition Time : 2005-10-12 10:59:59  
Instrument Name : HPLC Channel : A  
Rack/Vial : 0/0 Operator : manager  
Sample Amount : 1.000000 Dilution Factor : 1.000000  
Cycle : 1

Result File : D:\LC\wzy\Ph-CH(NH-PH-4-CH3)-CH3\051012-8-41-2.rst  
Sequence File : C:\PenExe\Tc\WS\Ver6.2.1\Examples\051012-8-41-2.seq

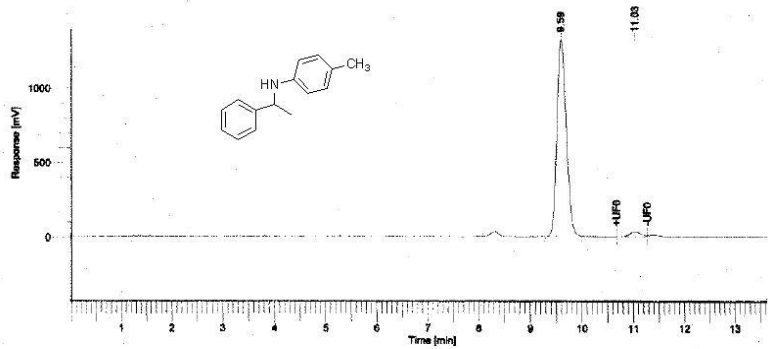

DEFAULT REPORT

| Peak # | Time [min] | Area [uV*sec] | Height [uV] | Area [%] |
|--------|------------|---------------|-------------|----------|
| 1      | 9.594      | 16374981.62   | 1.31e+06    | 97.25    |
| 2      | 11.030     | 462899.65     | 32210.94    | 2.75     |
|        |            | 16837881.27   | 1.34e+06    | 100.00   |

Missing Component Report  
Component Expected Retention (Calibration File)  
PE series200 0.001

## The HPLC spectra of 2t

e Version : 6.2.1.0.104:0104  
 Name : wzy8-40-1  
 ent Name : HPLC  
 ial : 0/0  
 Amount : 1.000000  
 : 1  
 Date : 2005-10-12 12:14:45  
 Data Acquisition Time : 2005-10-12 11:52:37  
 Channel : A  
 Operator : manager  
 Dilution Factor : 1.000000

File : D:\LC\wzy\Ph-CH(NH-Ph-4-Br)-CH3\051012-8-40-1xx.rst  
 ce File : C:\PenExe\TcWS\Ver6.2.1\Examples\051012-8-40-1xx.seq

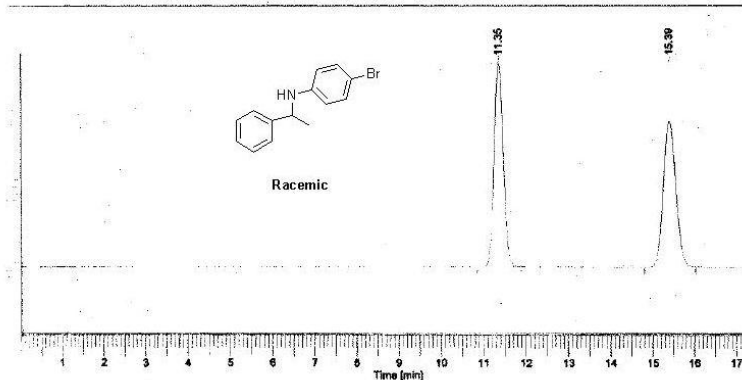

### DEFAULT REPORT

| Time [min] | Area [uV*sec] | Height [uV] | Area [%] |
|------------|---------------|-------------|----------|
| 11.351     | 8727131.38    | 583856.36   | 49.96    |
| 15.386     | 8742523.70    | 419505.75   | 50.04    |
|            | 17469655.08   | 1.00e+06    | 100.00   |

g Component Report  
 onent Expected Retention (Calibration File)

ies200 0.001

Software Version : 6.2.1.0.104:0104  
 Sample Name : wzy8-41-1  
 Instrument Name : HPLC  
 Rack/Vial : 0/0  
 Sample Amount : 1.000000  
 Cycle : 1  
 Date : 2005-11-2 15:33:57  
 Data Acquisition Time : 2005-10-12 12:17:24  
 Channel : A  
 Operator : manager  
 Dilution Factor : 1.000000

Result File : D:\LC\wzy\Ph-CH(NH-Ph-4-Br)-CH3\051012-8-41-1.rst  
 Sequence File : C:\PenExe\TcWS\Ver6.2.1\Examples\051012-8-41-1.seq

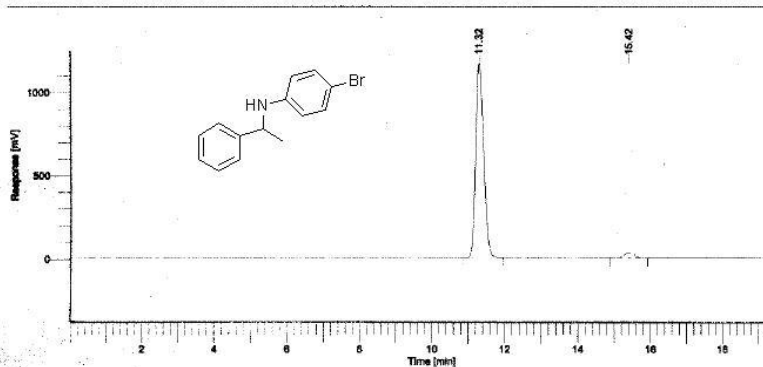

### DEFAULT REPORT

| Peak # | Time [min] | Area [uV*sec] | Height [uV] | Area [%] |
|--------|------------|---------------|-------------|----------|
| 1      | 11.320     | 17642361.23   | 1.17e+06    | 96.52    |
| 2      | 15.418     | 635583.31     | 30917.32    | 3.48     |
|        |            | 18277944.55   | 1.20e+06    | 100.00   |

Missing Component Report  
 Component Expected Retention (Calibration File)

PE series200 0.001

The HPLC spectra of 2u

Page 1

Software Version : 6.2.1.0.104:0104 Date : 2005-8-2 11:51:46  
Sample Name : wzy7-11-3 Data Acquisition Time : 2005-8-2 11:24:41  
Instrument Name : HPLC Channel : A  
Rack/Vial : 0/0 Operator : manager  
Sample Amount : 1.000000 Dilution Factor : 1.000000  
Cycle : 1

Result File : D:\LC\wzy\Ph-CH(NH-Ph-4-Cl)-CH3\050802-7-11-3xx.rst  
Sequence File : C:\PenExe\TcWS\Ver6.2.1\Examples\050802-7-11-3xx.seq

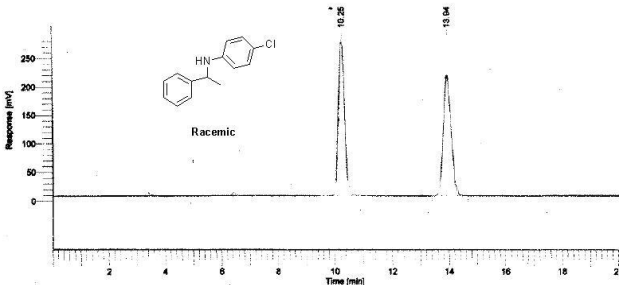

DEFAULT REPORT

| Peak # | Time [min] | Area [uV*sec] | Height [uV] | Area [%] |
|--------|------------|---------------|-------------|----------|
| 1      | 10.251     | 3982122.49    | 280660.88   | 50.03    |
| 2      | 13.938     | 3977282.34    | 206845.18   | 49.97    |
|        |            | 7959404.83    | 487506.06   | 100.00   |

Missing Component Report  
Component Expected Retention (Calibration File)  
PE series200 0.001

Page 1

Software Version : 6.2.1.0.104:0104 Date : 2005-11-2 13:17:11  
Sample Name : wzy8-31-7 Data Acquisition Time : 2005-9-29 13:39:50  
Instrument Name : HPLC Channel : A  
Rack/Vial : 0/0 Operator : manager  
Sample Amount : 1.000000 Dilution Factor : 1.000000  
Cycle : 1

Result File : D:\LC\wzy\Ph-CH(NH-Ph-4-Cl)-CH3\050929-re8-31-7.rst  
Sequence File : C:\PenExe\TcWS\Ver6.2.1\Examples\050929-re8-31-7.seq

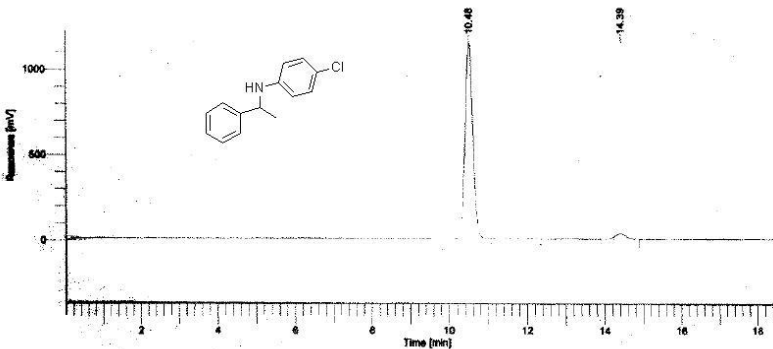

DEFAULT REPORT

| Peak # | Time [min] | Area [uV*sec] | Height [uV] | Area [%] |
|--------|------------|---------------|-------------|----------|
| 1      | 10.480     | 15675154.65   | 1.14e+06    | 96.28    |
| 2      | 14.393     | 606236.33     | 32070.30    | 3.72     |
|        |            | 16281390.97   | 1.18e+06    | 100.00   |

Missing Component Report  
Component Expected Retention (Calibration File)  
PE series200 0.001

The HPLC spectra of 2v

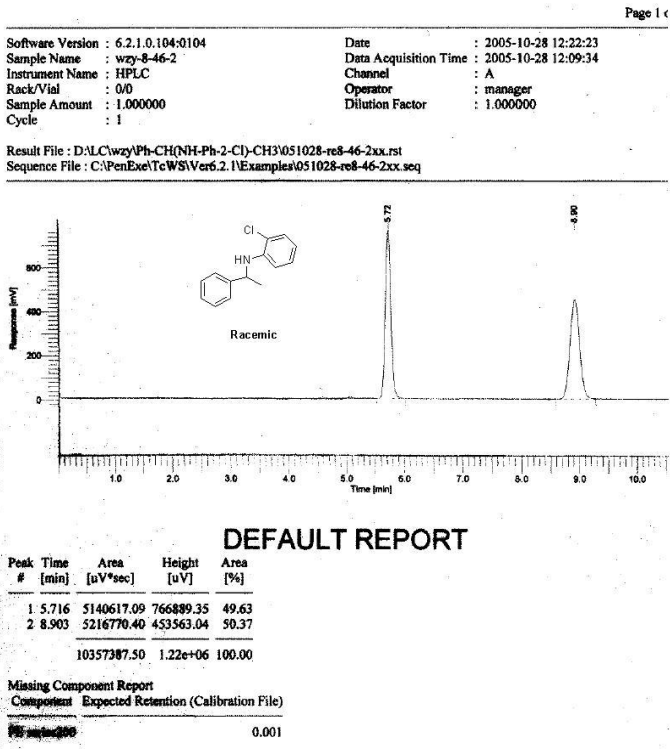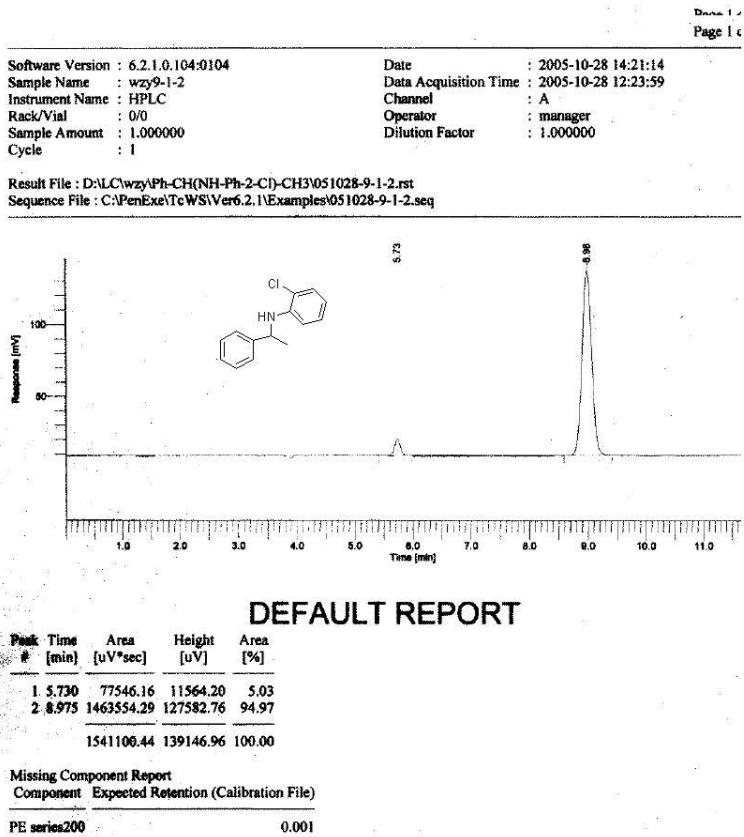

The HPLC spectra of **2w**

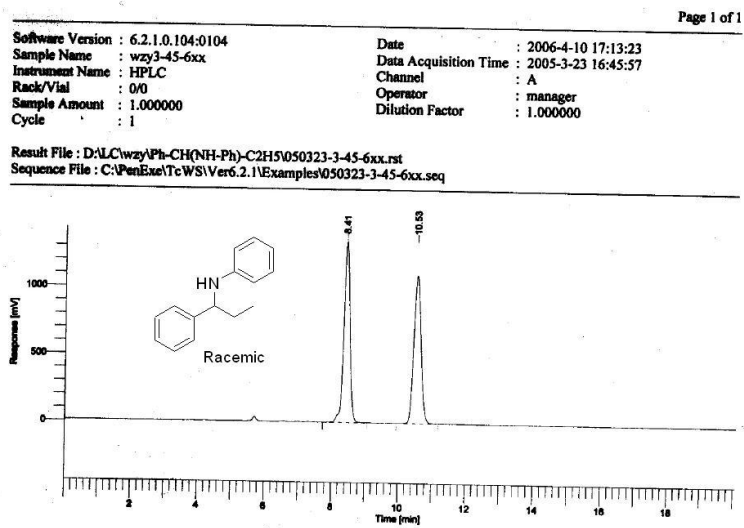

DEFAULT REPORT

| Peak # | Time [min] | Area [uV*sec] | Height [uV] | Area [%] |
|--------|------------|---------------|-------------|----------|
| 1      | 8.412      | 16817618.78   | 1.34e+06    | 50.72    |
| 2      | 10.531     | 16342099.70   | 1.09e+06    | 49.28    |
|        |            | 33159718.48   | 2.44e+06    | 100.00   |

Missing Component Report

| Component   | Expected Retention (Calibration File) |
|-------------|---------------------------------------|
| PE serie200 | 0.001                                 |

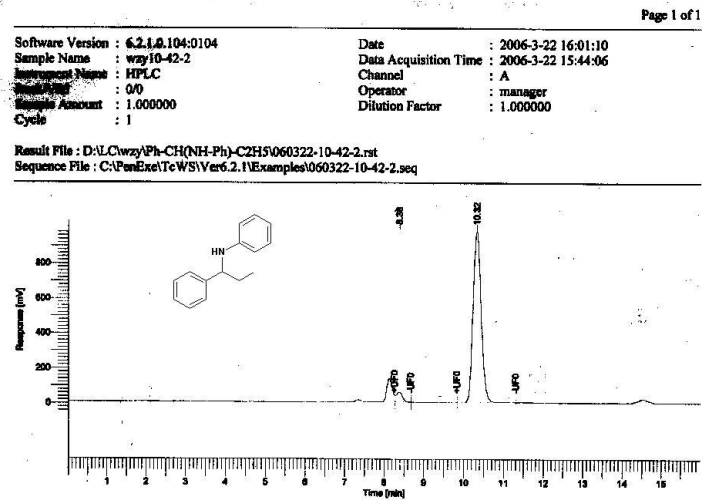

DEFAULT REPORT

| Peak # | Time [min] | Area [uV*sec] | Height [uV] | Area [%] |
|--------|------------|---------------|-------------|----------|
| 1      | 8.375      | 634209.86     | 57153.76    | 4.40     |
| 2      | 10.320     | 13783308.21   | 976139.69   | 95.60    |
|        |            | 14419659.07   | 1.03e+06    | 100.00   |

Missing Component Report

| Component   | Expected Retention (Calibration File) |
|-------------|---------------------------------------|
| PE serie200 | 0.001                                 |

Cat.

The HPLC spectra of 2x

Page 1 of 1

Software Version : 6.2.1.0.104:0104  
Sample Name : wzy7-28  
Instrument Name : HPLC  
Rack/Vial : 0/0  
Sample Amount : 1.000000  
Cycle : 1  
Date : 2005-8-18 16:24:53  
Data Acquisition Time : 2005-8-18 16:04:50  
Channel : A  
Operator : manager  
Dilution Factor : 1.000000

Result File : D:\LC\wzy\Ph-CH(NH-Ph)-C3H7\050818-7-28-xx.rst  
Sequence File : C:\PenExe\TcWS\Ver6.2.1\Examples\050818-7-28.seq

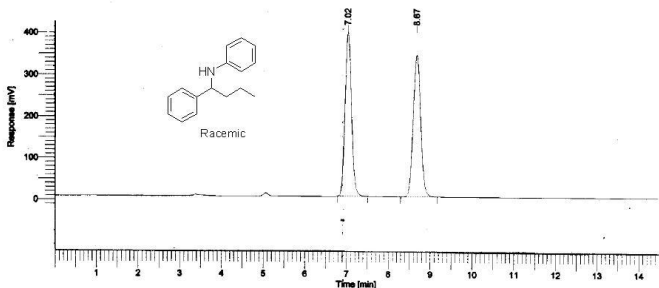

DEFAULT REPORT

| Peak # | Time [min] | Area [uV*sec] | Height [uV] | Area [%] |
|--------|------------|---------------|-------------|----------|
| 1      | 7.024      | 4203689.06    | 392839.71   | 49.83    |
| 2      | 8.669      | 4232831.80    | 340173.91   | 50.17    |
|        |            | 8436520.86    | 733013.62   | 100.00   |

Missing Component Report  
Component Expected Retention (Calibration File)  
PE series200 0.001

Page 1 of 1

Software Version : 6.2.1.0.104:0104  
Sample Name : wzy10-42-3  
Instrument Name : HPLC  
Rack/Vial : 0/0  
Sample Amount : 1.000000  
Cycle : 1  
Date : 2006-3-22 16:22:07  
Data Acquisition Time : 2006-3-22 16:03:32  
Channel : A  
Operator : manager  
Dilution Factor : 1.000000

Result File : D:\LC\wzy\Ph-CH(NH-Ph)-C3H7\060322-10-42-3.rst  
Sequence File : C:\PenExe\TcWS\Ver6.2.1\Examples\060322-10-42-3.seq

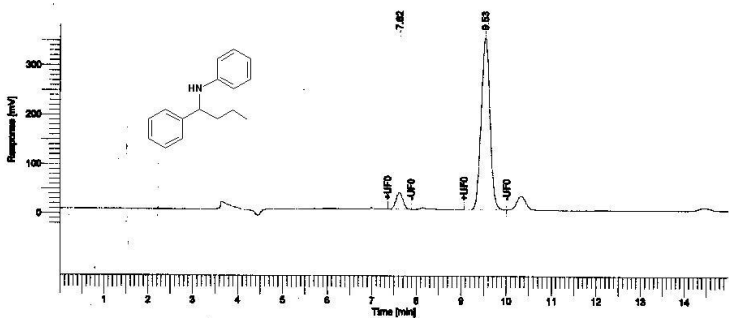

DEFAULT REPORT

| Peak # | Time [min] | Area [uV*sec] | Height [uV] | Area [%] |
|--------|------------|---------------|-------------|----------|
| 1      | 7.615      | 365305.59     | 33736.44    | 7.16     |
| 2      | 9.525      | 4736490.53    | 349341.86   | 92.84    |
|        |            | 5101796.12    | 383078.30   | 100.00   |

Missing Component Report  
Component Expected Retention (Calibration File)  
PE series200 - 0.001

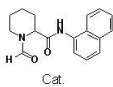

The HPLC spectra of 2y

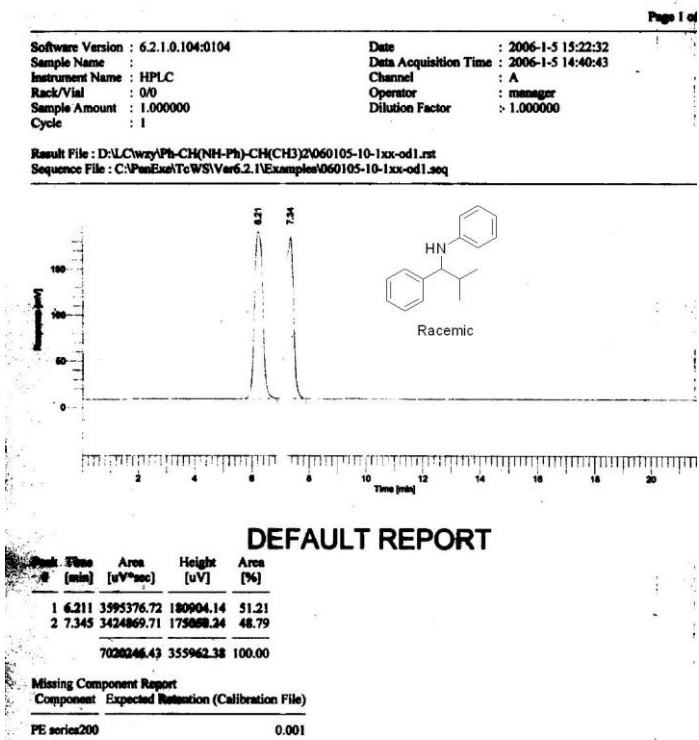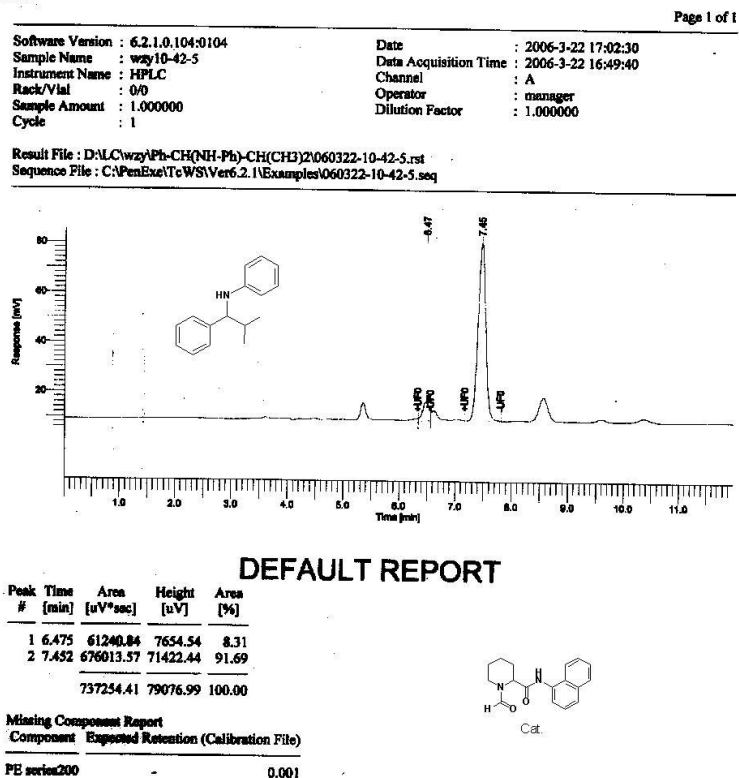

The HPLC spectra of 2z

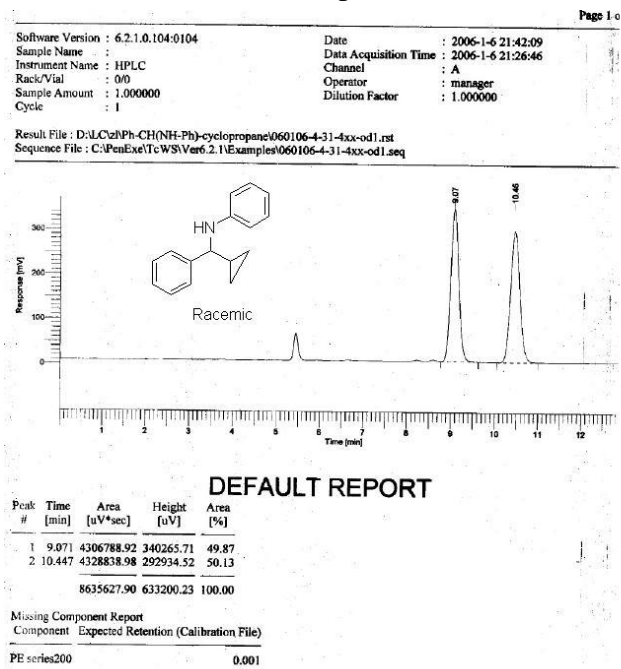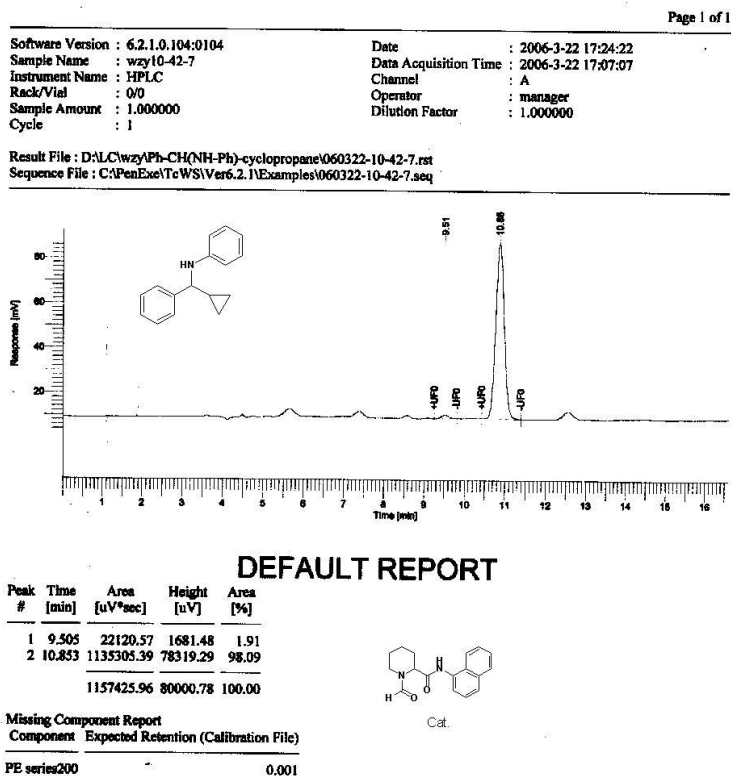

The HPLC spectra of 2 a'

Page 1 of 1

Software Version : 6.2.1.0.104.0104  
Sample Name :  
Instrument Name : HPLC  
Rack/Vial : 0/0  
Sample Amount : 1.000000  
Cycle : 1  
Date : 2006-1-6 20:58:08  
Data Acquisition Time : 2006-1-6 20:45:21  
Channel : A  
Operator : manager  
Dilution Factor : 1.000000  
Result File : D:\LC\wpc\Ph-CH(NH-Ph)-C4H9\060106-13-31xx-od1.rst  
Sequence File : C:\PenExe\TcWS\Ver6.2.1\Examples\060106-13-31xx-od1.seq

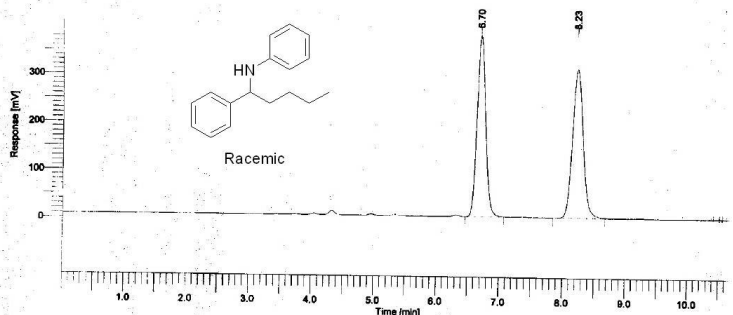

DEFAULT REPORT

| Peak # | Time [min] | Area [uV*sec] | Height [uV] | Area [%] |
|--------|------------|---------------|-------------|----------|
| 1      | 6.699      | 3572063.35    | 378090.26   | 49.66    |
| 2      | 8.226      | 3621282.74    | 310642.22   | 50.34    |
| <hr/>  |            |               |             |          |
|        | 7193346.09 | 688732.47     | 100.00      |          |

Missing Component Report  
Component Expected Retention (Calibration File)  
PE series200 0.001

Page 1 of 1

Software Version : 6.2.1.0.104.0104  
Sample Name : 060322-10-42-4  
Instrument Name : HPLC  
Rack/Vial : 0/0  
Sample Amount : 1.000000  
Cycle : 1  
Date : 2006-3-22 16:50:34  
Data Acquisition Time : 2006-3-22 16:23:01  
Channel : A  
Operator : manager  
Dilution Factor : 1.000000  
Result File : D:\LC\wzy\Ph-CH(NH-Ph)-C4H9\060322-10-42-4.rst  
Sequence File : C:\PenExe\TcWS\Ver6.2.1\Examples\060322-10-42-4.seq

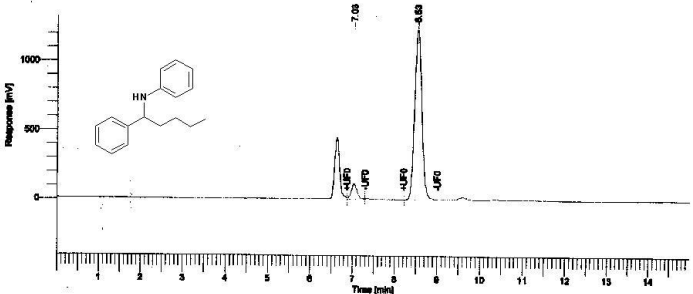

DEFAULT REPORT

| Peak # | Time [min]  | Area [uV*sec] | Height [uV] | Area [%] |
|--------|-------------|---------------|-------------|----------|
| 1      | 7.032       | 1038926.46    | 111386.97   | 6.69     |
| 2      | 8.532       | 14446769.66   | 1.23e+06    | 93.31    |
| <hr/>  |             |               |             |          |
|        | 15482696.13 | 1.35e+06      | 100.00      |          |

Missing Component Report  
Component Expected Retention (Calibration File)  
PE series200 0.001
